# Supplementary material for: Proteomic responses to gold(iii)-toxicity in the bacterium Cupriavidus metallidurans CH34
Source: Royal Society of Chemistry journal article supplement (doi:10.1039/c6mt00142d), 2016-01-01

## Supplementary Figure S1

Comparison of fragmentation patterns of significant peptide VSADVPTQSVK detected in (A) Spot 9 (see Figure 4 and Table 3) and (B) in MS after LA-ICP-MS experiment (see Table 4). The strong similarity of the two fragmentation patterns suggests that the peptide assigned to copper chaperon, heavy metal ion binding (modular protein) in Spot 9 is not a random event. Proteins were considered identified by Orbitrap MS when one peptide had a score above the MASCOT homology threshold.

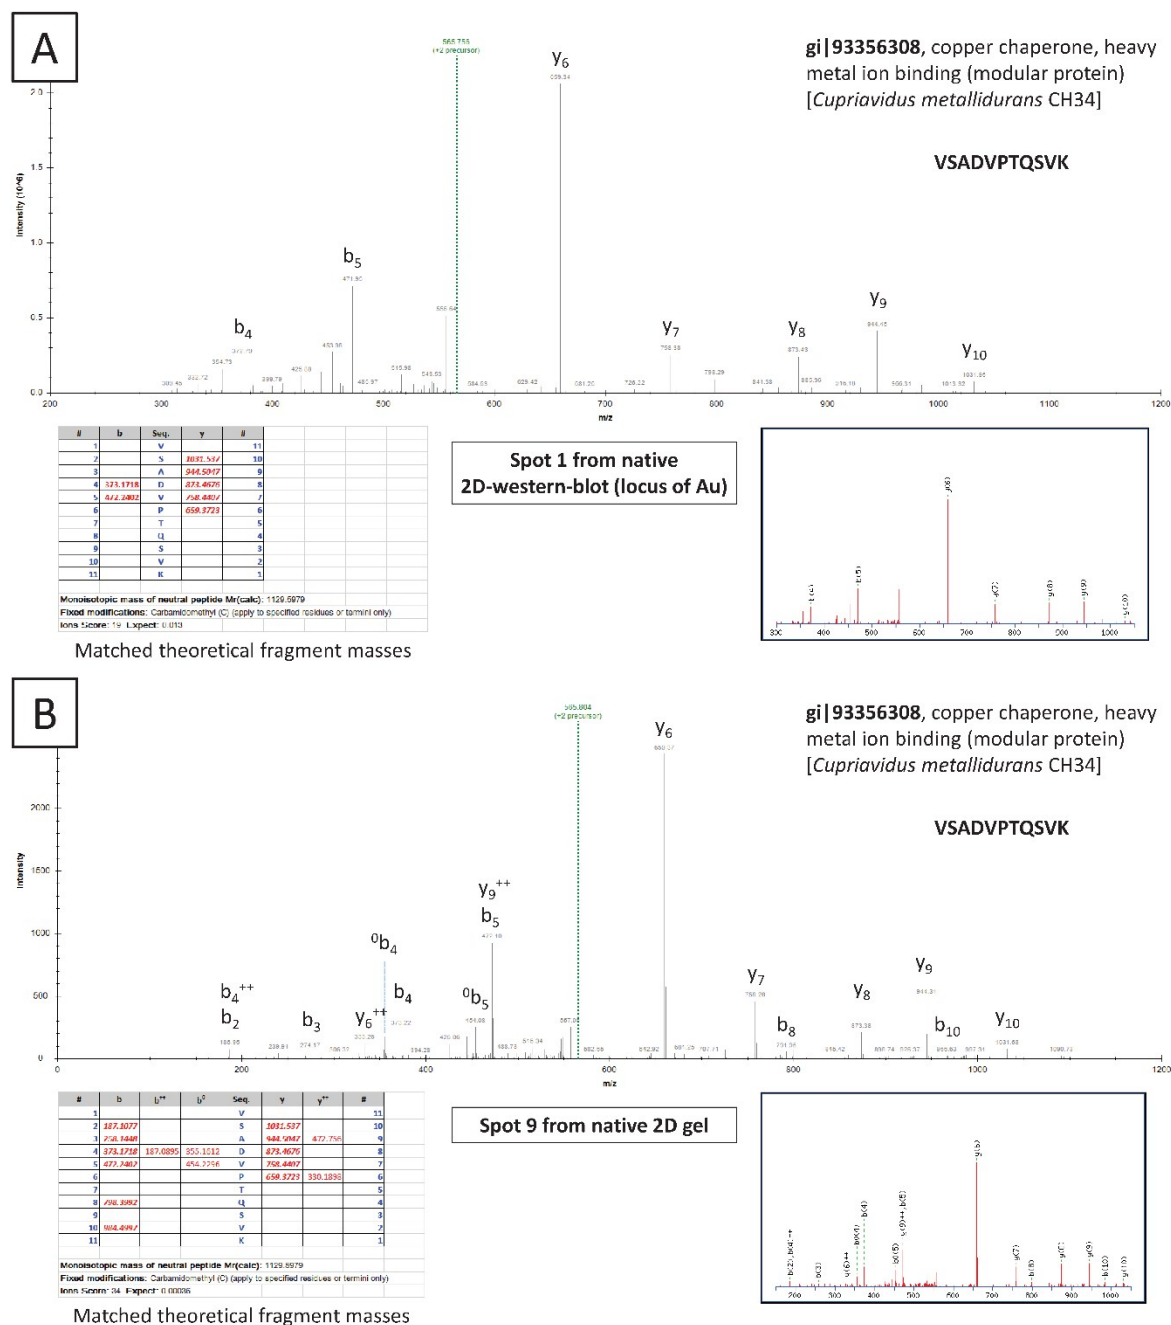

Supplement: c6mt00142d1.pdf [file c6mt00142d1.pdf]
