# Supplementary material for: Proteomic responses to gold(iii)-toxicity in the bacterium Cupriavidus metallidurans CH34
Source: Royal Society of Chemistry journal article supplement (doi:10.1039/c6mt00142d), 2016-01-01
Supplement: c6mt00142d2.pdf [file c6mt00142d2.pdf]

### Supplementary Tables (Captions)

**Table S1** Operating parameters for LA-ICP-MS

**Table S2** Differentially expressed proteins between *C. metallidurans* CH34 challenged with Au(III), Cu(II) and unamended cells. RF depicts the regulation factor in first named condition compared to the second, where positive values show up-, negative values down-regulation.

**Table S3** Identified, significant (expectation <0.05) peptides of inferred proteins (>= 2 peptides) in 2D DIGE gel.

**Table S4** Identified, significant (expectation <0.05) peptides of inferred proteins (>= 2 peptides) in gel spots corresponding to Au-upregulated loci in native 2DE WB.

**Table S5** Identified, significant (expectation <0.05) peptides of inferRed proteins (>= 2 peptides) in gel spot corresponding to Au-containing locus in native 2DE WB.
