# Supplementary material for: Proteomic responses to gold(iii)-toxicity in the bacterium Cupriavidus metallidurans CH34
Source: Royal Society of Chemistry journal article supplement (doi:10.1039/c6mt00142d), 2016-01-01
Supplement: c6mt00142d3.xlsx [file c6mt00142d3.xlsx]

## Sheet: Table S1
Agilent 7700s ICP-MS
RF power	1300W
Plasma gas	15 L min-1
Auxiliary gas	0.70 L min-1
Carrier gas	0.93 L min-1
Data acquisition mode	Peak-hopping
Integration time	0.005s
Resonetics M-50 laser ablation system
Energy level	80 mJ
Pulse rate	10 Hz
Beam diameter	300 mm
Scan speed	150 um/s

## Sheet: Table S2
Master	p-value	p-value	p-value	p-value	fold change	fold change	fold change	fold change	p-value	fold change in	p-value	fold change in	Protein identified
Number	10 Au vs Control	25 Au vs Control	10 Au vs 50 Cu	25 Au vs 50 Cu	10 Au vs Control	25 Au vs Control	10 Au vs 50 Cu	25 Au vs 50 Cu	50 Cu vs Control	50 Cu vs Control	25 Au vs 10 Au	25 Au vs 10 Au	by MS
209	3.34411e-06	2.99952e-05	2.12878e-06	9.60076e-06	5.85588	3.54497	11.4735	6.94573	0.00562506	0.510381	0.000740362	0.60537	TRUE
218	9.11977e-05	0.000143485	6.51066e-06	3.87954e-06	2.66914	2.0843	3.95402	3.08765	0.0012458	0.675045	0.0612736	0.780888	TRUE
219	8.15556e-07	3.63249e-06	9.2419e-07	2.60095e-06	2.47221	1.94852	3.76949	2.971	0.000234216	0.655846	0.00505341	0.788169	TRUE
256	0.000842775	0.00019675	0.000148112	3.13068e-05	2.03355	1.81647	3.12603	2.79234	0.00110332	0.65052	0.219299	0.893253	TRUE
259	4.27432e-06	1.64325e-05	2.30536e-08	1.63723e-07	2.38423	2.10908	3.21531	2.84424	0.00173407	0.741525	0.0177468	0.884593	TRUE
341	4.75943e-05	0.000273134	1.32886e-05	5.04545e-05	1.97795	1.72217	2.54313	2.21426	0.0239237	0.777763	0.0540454	0.870683	FALSE
375	3.49291e-05	0.000488218	5.24841e-06	0.000109432	3.86734	3.16753	4.92747	4.03583	0.0348682	0.784852	0.305334	0.819047	FALSE
535	2.54845e-06	6.32138e-06	0.000128979	0.000657543	4.53757	3.84947	2.08204	1.76632	0.000343046	2.17938	0.0428844	0.848356	FALSE
562	6.76654e-06	4.41054e-06	0.000100873	7.39137e-05	8.56897	7.61847	3.47623	3.09064	0.000656811	2.46502	0.39248	0.889077	TRUE
586	3.52564e-05	3.64582e-05	4.43685e-05	7.05389e-05	8.0414	9.67409	3.25245	3.91282	0.00424401	2.47241	0.187532	1.20304	TRUE
587	2.66386e-07	2.57658e-07	4.84063e-05	3.46974e-05	5.39073	5.88587	3.02983	3.30813	0.00335513	1.77922	0.0577305	1.09185	FALSE
589	8.8115e-05	9.23056e-05	0.000390628	0.000423622	4.45163	4.30826	2.66393	2.57813	0.0460093	1.67108	0.515865	0.967794	FALSE
593	4.1369e-06	5.41205e-06	5.78337e-07	1.68251e-06	11.1598	10.8004	4.164	4.02989	0.000688056	2.68006	0.672484	0.967793	TRUE
595	0.000724362	0.000128123	0.000265495	6.77221e-05	7.46157	7.59406	3.13499	3.19065	0.00991742	2.3801	0.830582	1.01776	FALSE
596	1.52546e-05	2.7193e-05	8.41084e-05	0.000215316	11.3305	8.96342	4.47245	3.5381	0.00949667	2.5334	0.000435091	0.791088	TRUE
597	1.09421e-08	4.43618e-08	1.35917e-05	2.32187e-05	6.63649	5.66576	7.90476	6.74853	0.324416	0.839556	0.0112832	0.853729	TRUE
600	7.59314e-07	1.0096e-06	2.04275e-07	2.02096e-07	9.8605	8.42449	3.44805	2.9459	9.00093e-05	2.85973	0.000918921	0.854367	TRUE
605	4.10818e-05	8.45288e-05	5.00529e-05	8.57015e-05	5.50488	4.40147	10.139	8.1067	0.0564375	0.542942	0.0562474	0.799558	TRUE
609	5.46158e-05	4.54809e-05	2.5323e-05	1.80973e-05	4.13862	4.27948	2.65972	2.75025	0.0179494	1.55604	0.718386	1.03403	TRUE
618	2.57363e-05	0.00016476	0.000392871	0.00062464	2.19206	2.35077	2.42053	2.59578	0.474778	0.905612	0.493117	1.0724	FALSE
619	1.39388e-05	0.000115919	6.15897e-05	0.000488769	3.13368	3.59785	4.68462	5.37851	0.0213237	0.66893	0.307538	1.14812	FALSE
632	0.000609732	0.000196977	9.0223e-05	2.66459e-05	1.45969	1.46665	1.68896	1.69701	0.0412697	0.864257	0.924273	1.00477	FALSE
657	6.68407e-06	9.20031e-05	0.000769595	0.000309218	1.85326	1.71095	2.50662	2.31414	0.0618449	0.739346	0.159065	0.923211	FALSE
695	0.000371851	0.000203689	0.000776132	0.000375748	2.06591	2.78981	1.677	2.26462	0.0291644	1.23191	0.0660771	1.3504	FALSE
696	0.000864861	0.00058854	0.000326789	0.000333068	1.6626	1.49084	2.37792	2.13226	0.0175672	0.699182	0.189875	0.89669	FALSE
697	0.000921355	4.45991e-05	0.000500647	1.48843e-05	1.54394	1.72051	1.56965	1.74916	0.674472	0.983622	0.201491	1.11436	FALSE
698	1.33356e-05	1.2162e-05	0.000125568	0.000168727	2.97109	2.66802	2.94699	2.64637	0.951018	1.00818	0.170796	0.897994	TRUE
702	1.71437e-05	1.21242e-05	8.8992e-07	3.7285e-07	1.99216	1.9307	2.46755	2.39143	0.00430827	0.807343	0.525273	0.969152	FALSE
708	0.000301797	0.000158896	1.75121e-05	1.11276e-06	2.70187	2.63015	2.81193	2.73729	0.743008	0.960858	0.75709	0.973456	FALSE
715	2.91869e-05	0.000606455	3.09579e-05	0.000977118	3.07358	2.2282	2.747	1.99145	0.328905	1.11888	0.0260556	0.724953	FALSE
734	0.000210262	0.000955204	2.60337e-05	9.51747e-05	2.4989	1.99978	3.80649	3.0462	0.00896645	0.656485	0.00914949	0.800264	TRUE
748	3.7801e-05	5.58248e-05	2.65918e-05	4.07582e-05	2.33064	1.82839	2.74991	2.15731	0.08893	0.847535	0.0124431	0.784501	FALSE
778	7.96148e-06	7.07337e-05	4.24823e-07	4.75606e-06	2.55842	2.22397	3.58221	3.11393	0.00275797	0.714201	0.0984331	0.869277	TRUE
812	0.000107049	0.00013093	7.59111e-07	2.71339e-06	2.37282	2.3901	2.2636	2.28009	0.654646	1.04825	0.86241	1.00728	FALSE
863	2.7291e-09	1.41182e-09	5.81027e-07	2.17847e-07	2.95575	3.58111	2.71372	3.28786	0.0984628	1.08919	0.000231238	1.21157	TRUE
874	3.42978e-05	4.66777e-05	2.04868e-07	6.81419e-07	4.30732	4.10707	3.19918	3.05044	0.073577	1.34638	0.279475	0.953509	TRUE
879	0.000956662	0.000474198	0.000257306	0.000352886	1.85931	1.75766	1.50525	1.42295	0.00936988	1.23522	0.426139	0.945326	FALSE
928	9.0107e-06	2.85867e-05	2.9207e-06	6.64801e-06	2.28004	1.94692	3.08928	2.63794	0.0100214	0.738049	0.00467686	0.8539	TRUE
977	1.82942e-05	8.61387e-08	3.73925e-05	3.41639e-06	2.12386	2.56008	2.57442	3.10318	0.0259714	0.824987	0.0299163	1.20539	TRUE
1060	1.06977e-06	3.77598e-06	3.047e-07	8.39471e-07	3.01682	2.61053	4.25889	3.68533	0.00366517	0.708358	0.00956945	0.865325	TRUE
1074	0.000629897	0.000551987	0.000358177	0.000120687	1.83175	1.54275	1.80705	1.52194	0.807066	1.01367	0.10535	0.842224	FALSE
1124	0.000409784	0.000858313	6.56916e-06	2.73356e-06	1.58424	1.41512	1.98191	1.77035	0.0103193	0.799346	0.0340878	0.89325	FALSE
1221	3.24029e-06	4.86049e-06	1.16714e-05	1.98821e-05	2.68217	2.30855	3.47114	2.98761	0.0372998	0.772707	0.0239877	0.860701	TRUE
1237	9.51008e-05	0.000138511	6.58001e-05	9.95441e-05	2.99619	2.8705	2.91501	2.79272	0.830989	1.02785	0.708259	0.958048	TRUE
1264	0.000319906	0.000152186	4.20681e-05	1.73736e-05	2.00071	1.86322	2.78496	2.59358	0.0137513	0.718399	0.378329	0.93128	FALSE
1304	1.14485e-05	2.00367e-05	8.88867e-05	0.000145984	1.94965	1.82985	2.09689	1.96803	0.437715	0.929784	0.120058	0.938549	FALSE
1308	3.04237e-06	0.00012939	1.2779e-06	4.69514e-05	2.52693	2.32128	2.32586	2.13657	0.248444	1.08645	0.0440328	0.918616	FALSE
1417	1.9906e-06	6.10014e-06	2.51797e-07	9.50386e-07	2.76446	2.48197	3.07818	2.76364	0.105583	0.898082	0.0783647	0.897815	TRUE
1429	8.3863e-06	3.23159e-05	6.91054e-06	2.17181e-05	3.13231	2.98682	3.69871	3.52691	0.14357	0.846867	0.618382	0.953552	TRUE
1487	1.57183e-07	3.40611e-05	0.000126728	0.000996155	3.56251	2.74042	3.40695	2.62075	0.771429	1.04566	0.0183696	0.769237	FALSE
1493	1.95364e-05	0.000201263	5.22655e-06	4.5597e-05	2.41427	2.19091	3.09752	2.81095	0.0269296	0.779419	0.314398	0.907485	FALSE
1651	8.62057e-05	1.05615e-05	0.000132538	1.4781e-05	2.44322	2.89501	2.27042	2.69025	0.477775	1.07611	0.0689274	1.18491	FALSE
1653	2.97733e-05	8.60184e-05	9.89672e-05	0.000351632	3.53328	2.78209	2.94942	2.32236	0.202079	1.19796	0.0562766	0.787397	FALSE
1672	1.85241e-07	1.79337e-06	1.23008e-07	1.05012e-06	2.94341	2.22582	3.16949	2.39678	0.146333	0.92867	0.000434331	0.756203	TRUE
1681	2.4087e-05	1.41016e-06	0.00016791	1.90204e-05	3.99916	4.1255	3.17501	3.27531	0.0999542	1.25957	0.593486	1.03159	TRUE
1760	0.00018068	3.6442e-05	0.000289332	3.05132e-05	2.25749	2.22483	1.94747	1.91929	0.120734	1.15919	0.863975	0.985532	FALSE
1902	0.000165522	0.000469496	2.08432e-05	0.000147642	3.60561	3.16128	2.91024	2.55161	0.247404	1.23894	0.194656	0.876769	FALSE
1933	9.24921e-06	4.50676e-05	3.85932e-06	1.94902e-05	2.86109	2.49286	3.13969	2.7356	0.374958	0.911264	0.0556708	0.871297	TRUE
1956	0.000231334	0.000171368	0.000236171	0.000144318	2.48076	2.03446	2.48441	2.03745	0.990196	0.998531	0.00198782	0.820093	TRUE
2087	0.127604	0.125765	0.000124129	2.57968e-05	2.10356	1.91316	0.0524991	0.0477471	5.4381e-05	40.0686	0.78781	0.909484	TRUE

## Sheet: TableS3
Spot	NCBI Accession Number Version	Locus	Taxonomy	Protein Description	Mr	pI	# Unique Peptides	Coverage [%]	Heuristic	Peptide Sequence	Expectation	mr_calc	mr_exp	ppm	z	# Missed Cleavages	Modified Peptide Sequence
(A)
209	ABF09369.1	Rmet_2492	Cupriavidus metallidurans CH34	aconitate hydratase 1	97943.8	6.58351	38	62.2642	2366.04	YIAEGTPTVVFGGEEYGTGSSR	1.21e-09	2276.06	2276.07	4.70155	2	0
										VVLQDFTGVPLLADLAAMR	1.13e-08	2044.1	2044.11	4.75368	2	0	VVLQDFTGVPLLADLAAM[147]R
										YIAEGTPTVVFGGEEYGTGSSR	2.21e-08	2276.06	2276.07	4.59434	2	0
										ATIGNMAPEYGATMGFFPVDEK	2.4e-08	2377.06	2377.07	2.8855	3	0	ATIGNM[147]APEYGATM[147]GFFPVDEK
										ATIGNMAPEYGATMGFFPVDEK	1.4e-07	2345.07	2345.08	3.78624	2	0
										ATIGNMAPEYGATMGFFPVDEK	1.4e-07	2377.06	2377.07	3.5018	3	0	ATIGNM[147]APEYGATM[147]GFFPVDEK
										FVEFFGEGTASLTTPDR	2.32e-07	1872.89	1872.9	5.27047	2	0
										FVEFFGEGTASLTTPDR	2.61e-07	1872.89	1872.9	6.05268	2	0
										YIAEGTPTVVFGGEEYGTGSSR	3.21e-07	2276.06	2276.07	3.84348	2	0
										FVEFFGEGTASLTTPDR	4.88e-07	1872.89	1872.9	4.29283	2	0
										VHNGDVLIAAITSCTNTSNPSVLLAAGLLAK	6.38e-07	3120.67	3120.68	2.17261	3	0	VHNGDVLIAAITSC[160]TNTSNPSVLLAAGLLAK
										ATIGNMAPEYGATMGFFPVDEK	6.6e-07	2377.06	2377.07	4.88839	3	0	ATIGNM[147]APEYGATM[147]GFFPVDEK
										TDEEIAAFEGYFR	6.72e-07	1546.69	1546.7	2.33789	2	0
										VEGGITLHQPTGEELSIYDAAMK	7.31e-07	2474.2	2474.21	3.80729	3	0	VEGGITLHQPTGEELSIYDAAM[147]K
										TDEEIAAFEGYFR	8.51e-07	1546.69	1546.7	4.0745	2	0
										EGVTATDLVLTITEMLR	1.05e-06	1876.98	1876.99	7.07572	2	0	EGVTATDLVLTITEM[147]LR
										FVEFFGEGTASLTTPDR	1.26e-06	1872.89	1872.89	1.09937	2	0
										VEGGITLHQPTGEELSIYDAAMK	1.88e-06	2474.2	2474.21	4.62129	3	0	VEGGITLHQPTGEELSIYDAAM[147]K
										ALGVFGDSVTTDHISPAGSIK	1.91e-06	2072.07	2072.07	0.409736	2	0
										VVLQDFTGVPLLADLAAMR	1.95e-06	2045.11	2045.1	-4.9122	2	0	VVLQDFTGVPLLADLAAM[147]R
										ATIGNMAPEYGATMGFFPVDEK	2.09e-06	2377.06	2377.07	4.73989	2	0	ATIGNM[147]APEYGATM[147]GFFPVDEK
										TDEEIAAFEGYFR	2.41e-06	1546.69	1546.7	2.02238	2	0
										EGVTATDLVLTITEMLR	2.51e-06	1876.98	1876.99	4.01922	2	0	EGVTATDLVLTITEM[147]LR
										GQYYSLPQLGK	2.65e-06	1252.65	1252.65	4.71642	2	0
										ATIGNMAPEYGATMGFFPVDEK	2.87e-06	2379.08	2379.09	5.36217	2	0	ATIGNM[147]APEYGATM[147]GFFPVDEK
										EGVTATDLVLTITEMLR	3.03e-06	1860.99	1860.99	2.42828	2	0
										ANFLASPPLVVAYAIAGNVTR	4.63e-06	2143.18	2143.19	6.98402	2	0
										ATIGNMAPEYGATMGFFPVDEK	5.46e-06	2377.06	2377.07	4.84254	2	0	ATIGNM[147]APEYGATM[147]GFFPVDEK
										ALGVFGDSVTTDHISPAGSIKDTSPAGK	5.71e-06	2727.37	2727.38	3.26835	3	1
										ATIGNMAPEYGATMGFFPVDEK	5.85e-06	2361.07	2361.08	7.57539	2	0	ATIGNMAPEYGATM[147]GFFPVDEK
										FVEFFGEGTASLTTPDR	6.18e-06	1872.89	1872.9	4.48879	2	0
										ANFLASPPLVVAYAIAGNVTR	6.51e-06	2143.18	2143.19	5.63929	3	0
										SNLVGMGVLPLQFK	8.08e-06	1501.83	1501.84	3.94518	2	0
										FVEFFGEGTASLTTPDR	1.09e-05	1872.89	1872.89	2.46784	2	0
										GQYYSLPQLGK	1.09e-05	1252.65	1252.65	4.42424	2	0
										EGVTATDLVLTITEMLR	1.42e-05	1876.98	1876.99	2.8093	3	0	EGVTATDLVLTITEM[147]LR
										YIAEGTPTVVFGGEEYGTGSSR	1.45e-05	2276.06	2276.07	3.41423	2	0
										TDEEIAAFEGYFR	1.6e-05	1546.69	1546.7	3.12732	2	0
										VVLQDFTGVPLLADLAAMR	1.81e-05	2044.1	2044.11	4.35888	3	0	VVLQDFTGVPLLADLAAM[147]R
										VEGGITLHQPTGEELSIYDAAMK	2.08e-05	2458.2	2458.22	4.53827	3	0
										SNLVGMGVLPLQFK	2.24e-05	1517.83	1517.83	4.28837	2	0	SNLVGM[147]GVLPLQFK
										FVEFFGEGTASLTTPDR	2.35e-05	1872.89	1872.9	6.83489	2	0
										VHNGDVLIAAITSCTNTSNPSVLLAAGLLAK	2.49e-05	3120.67	3120.62	-16.8384	3	0	VHNGDVLIAAITSC[160]TNTSNPSVLLAAGLLAK
										VVLQDFTGVPLLADLAAMR	2.75e-05	2044.1	2044.11	3.28408	3	0	VVLQDFTGVPLLADLAAM[147]R
										TDEEIAAFEGYFR	2.82e-05	1546.69	1546.71	7.46819	2	0
										ANFLASPPLVVAYAIAGNVTR	3.04e-05	2143.18	2143.19	5.61689	2	0
										EGVTATDLVLTITEMLR	3.22e-05	1876.98	1876.99	4.9553	3	0	EGVTATDLVLTITEM[147]LR
										VEGGITLHQPTGEELSIYDAAMK	3.34e-05	2458.2	2458.21	3.34634	3	0
										TDEEIAAFEGYFR	3.63e-05	1546.69	1546.7	4.42104	3	0
										VVLQDFTGVPLLADLAAMR	4.05e-05	2028.11	2028.12	3.78136	2	0
										DVADLDREYTNADGVK	4.13e-05	1779.83	1779.83	4.15714	3	1
										SNLVGMGVLPLQFK	4.22e-05	1501.83	1501.84	2.80724	2	0
										ANFLASPPLVVAYAIAGNVTR	5.41e-05	2143.18	2143.19	5.63929	3	0
										TLTLDLGTVAPSLAGPK	5.72e-05	1652.93	1652.94	4.73945	2	0
										NALDLNMQLEFK	6.29e-05	1450.71	1450.72	5.73511	2	0	NALDLNM[147]QLEFK
										VVLQDFTGVPLLADLAAMR	6.9e-05	2044.1	2044.12	7.08281	2	0	VVLQDFTGVPLLADLAAM[147]R
										WGMQAFDTFGVVQPGFGIVHQVNLEYLAR	7.04e-05	3295.64	3295.66	7.49021	3	0	WGM[147]QAFDTFGVVQPGFGIVHQVNLEYLAR
										VDEIPFVVAR	7.47e-05	1143.63	1143.63	3.69088	2	0
										YIAEGTPTVVFGGEEYGTGSSR	7.64e-05	2276.06	2276.08	7.38337	2	0
										SNLVGMGVLPLQFK	8.13e-05	1517.83	1517.83	4.20799	2	0	SNLVGM[147]GVLPLQFK
										YIAEGTPTVVFGGEEYGTGSSR	8.54e-05	2276.06	2276.07	4.42739	3	0
										SNLVGMGVLPLQFK	0.00011	1517.83	1517.83	4.77063	2	0	SNLVGM[147]GVLPLQFK
										VDEIPFVVAR	0.000112	1143.63	1143.63	3.69088	2	0
										STYIAEPPFFQDFALEPSGEAVTVR	0.000166	2770.35	2770.36	3.26313	3	0
										TDEEIAAFEGYFR	0.000169	1547.7	1547.7	-1.91445	2	0
										ATIGNMAPEYGATMGFFPVDEK	0.000193	2361.07	2361.07	0.150356	3	0	ATIGNMAPEYGATM[147]GFFPVDEK
										DVADLDREYTNADGVK	0.000207	1779.83	1779.83	3.23121	3	1
										ALGVFGDSVTTDHISPAGSIK	0.000217	2070.05	2070.04	-5.26316	2	0
										FVEFFGEGTASLTTPDR	0.000224	1872.89	1872.89	2.33756	2	0
										TLTLDLGTVAPSLAGPK	0.000224	1652.93	1652.94	5.77337	2	0
										GQYYSLPQLGK	0.000224	1252.65	1252.66	9.29713	2	0
										NALDLNMQLEFK	0.000262	1450.71	1450.72	3.88361	2	0	NALDLNM[147]QLEFK
										EGVTATDLVLTITEMLR	0.000293	1877.99	1878	4.47873	2	0	EGVTATDLVLTITEM[147]LR
										ATIGNMAPEYGATMGFFPVDEK	0.000317	2378.07	2378.08	4.81441	3	0	ATIGNM[147]APEYGATM[147]GFFPVDEK
										LGFGVTAYGCTTCIGNAGDLTQALNDTIVQNDIVAAAVLSGNR	0.000318	4411.17	4411.18	3.98647	4	0	LGFGVTAYGC[160]TTC[160]IGNAGDLTQALNDTIVQNDIVAAAVLSGNR
										STYIAEPPFFQDFALEPSGEAVTVR	0.000332	2770.35	2770.37	8.09284	2	0
										VEGGITLHQPTGEELSIYDAAMK	0.000371	2474.2	2474.21	4.32503	3	0	VEGGITLHQPTGEELSIYDAAM[147]K
										SLFAKPVAENGFNK	0.000383	1520.8	1520.8	3.41991	2	0
										VVLQDFTGVPLLADLAAMR	0.000393	2045.11	2045.12	3.14604	2	0	VVLQDFTGVPLLADLAAM[147]R
										NALDLNMQLEFK	0.000429	1450.71	1450.71	0.854752	2	0	NALDLNM[147]QLEFK
										EKNALDLNMQLEFK	0.000461	1707.85	1707.85	2.76547	3	1	EKNALDLNM[147]QLEFK
										ADFNSYGSR	0.000466	1015.44	1015.44	4.17161	2	0
										YIAEGTPTVVFGGEEYGTGSSR	0.000469	2276.06	2276.06	1.6924	3	0
										YIAEGTPTVVFGGEEYGTGSSR	0.000512	2276.06	2276.06	-1.73414	2	0
										NALDLNMQLEFKR	0.000519	1606.81	1606.82	4.47096	2	1	NALDLNM[147]QLEFKR
										DVADLDREYTNADGVK	0.000545	1779.83	1779.84	4.50774	2	1
										VDEIPFVVAR	0.000545	1143.63	1143.63	3.15749	2	0
										GQVYDWPK	0.000548	991.476	991.48	3.7772	2	0
										VDEIPFVVAR	0.00056	1143.63	1143.63	2.51655	2	0
										YIAEGTPTVVFGGEEYGTGSSR	0.000603	2277.07	2277.06	-1.94241	2	0
										TLTLDLGTVAPSLAGPK	0.000709	1652.93	1652.95	6.21682	2	0
										FVEFFGEGTASLTTPDR	0.000794	1872.89	1872.9	7.94281	2	0
										FVEFFGEGTASLTTPDR	0.000797	1872.89	1872.89	-0.634848	3	0
										VDEIPFVVAR	0.000893	1143.63	1143.63	3.15749	2	0
										ALGVFGDSVTTDHISPAGSIK	0.000921	2071.06	2071.07	4.02258	3	0
										ATIGNMAPEYGATMGFFPVDEK	0.000957	2361.07	2361.08	4.26629	2	0	ATIGNM[147]APEYGATMGFFPVDEK
										GQVYDWPK	0.001	991.476	991.479	3.0389	2	0
										FVEFFGEGTASLTTPDR	0.00103	1872.89	1872.88	-3.85394	2	0
										FVEFFGEGTASLTTPDR	0.00112	1873.9	1873.9	1.75677	2	0
										ATIGNMAPEYGATMGFFPVDEK	0.00116	2377.06	2377.07	3.40463	2	0	ATIGNM[147]APEYGATM[147]GFFPVDEK
										STYIAEPPFFQDFALEPSGEAVTVR	0.00117	2770.35	2770.37	8.68302	3	0
										KIEPLVPVDLVVDHSVQIDHFR	0.00122	2554.39	2554.41	6.23515	4	1
										TLTLDLGTVAPSLAGPK	0.00144	1652.93	1652.94	3.03339	3	0
										GQYYSLPQLGK	0.00156	1252.65	1252.65	6.37371	2	0
										VDEIPFVVAR	0.00165	1143.63	1143.63	3.05082	2	0
										YLLSHGVLK	0.00171	1028.6	1028.61	3.12074	2	0
										AQGMFGVPR	0.00194	961.48	961.484	4.26426	2	0
										YIAEGTPTVVFGGEEYGTGSSR	0.00198	2277.07	2277.08	6.84916	2	0
										TLTLDLGTVAPSLAGPK	0.00223	1653.94	1653.95	5.187	2	0
										SNLVGMGVLPLQFK	0.00228	1518.84	1518.84	2.84692	2	0	SNLVGM[147]GVLPLQFK
										ANFLASPPLVVAYAIAGNVTR	0.0023	2143.18	2143.19	4.78495	3	0
										AQGMFGVPR	0.0024	977.475	977.479	3.7914	2	0	AQGM[147]FGVPR
										GNDSVQSLGIVGNETFDVEGIEGDLKPQQDVTLVIHR	0.00258	3979	3979.01	0.852977	4	0
										GQYYSLPQLGK	0.00277	1252.65	1252.66	11.1484	2	0
										ALGVFGDSVTTDHISPAGSIK	0.00283	2072.07	2072.07	2.88408	2	0
										ANFLASPPLVVAYAIAGNVTR	0.00288	2144.19	2144.19	2.90973	3	0
										NALDLNMQLEFK	0.00293	1434.72	1434.72	3.35048	2	0
										TLTLDLGTVAPSLAGPK	0.00312	1652.93	1652.94	4.80539	3	0
										VVLESVLR	0.00316	913.56	913.563	3.94063	2	0
										TDEEIAAFEGYFR	0.00328	1546.69	1546.7	4.65768	3	0
										VVLESVLR	0.00338	913.56	913.563	4.0074	2	0
										AQGMFGVPR	0.0034	977.475	977.479	3.60418	2	0	AQGM[147]FGVPR
										AAGLLPYLDK	0.00456	1059.6	1059.6	4.68763	2	0
										VHNGDVLIAAITSCTNTSNPSVLLAAGLLAK	0.00466	3120.67	3120.68	3.32204	4	0	VHNGDVLIAAITSC[160]TNTSNPSVLLAAGLLAK
										AQGMFGVPR	0.00468	977.475	977.479	3.60418	2	0	AQGM[147]FGVPR
										DLMTEPVGK	0.00488	1004.48	1004.49	4.37836	2	0	DLM[147]TEPVGK
										YIAEGTPTVVFGGEEYGTGSSR	0.00557	2278.08	2278.06	-6.43745	2	0
										STYIAEPPFFQDFALEPSGEAVTVR	0.00603	2771.36	2771.38	8.27068	2	0
										FVEFFGEGTASLTTPDR	0.00609	1872.89	1872.9	3.27569	3	0
										ATIGNMAPEYGATMGFFPVDEK	0.00626	2361.07	2361.08	4.26079	3	0	ATIGNMAPEYGATM[147]GFFPVDEK
										TLTLDLGTVAPSLAGPK	0.00675	1652.93	1652.94	2.81983	2	0
										VHNGDVLIAAITSCTNTSNPSVLLAAGLLAK	0.00743	3119.66	3119.64	-7.33925	3	0	VHNGDVLIAAITSC[160]TNTSNPSVLLAAGLLAK
										SNLVGMGVLPLQFK	0.00879	1517.83	1517.82	-7.61483	2	0	SNLVGM[147]GVLPLQFK
										NALDLNMQLEFK	0.00909	1450.71	1450.72	2.95786	2	0	NALDLNM[147]QLEFK
										VDEIPFVVAR	0.00987	1144.64	1144.64	3.48495	2	0
										AAGLLPYLDK	0.0101	1059.6	1059.6	3.42017	2	0
										TLTLDLGTVAPSLAGPK	0.0108	1653.94	1653.95	4.67066	2	0
										AGEIDYSK	0.0112	881.413	881.418	5.46622	2	0
										EKNALDLNMQLEFK	0.0119	1707.85	1707.86	5.02445	2	1	EKNALDLNM[147]QLEFK
										GQYYSLPQLGK	0.0143	1252.65	1252.65	7.15286	2	0
										ATIGNMAPEYGATMGFFPVDEK	0.0156	2377.06	2377.05	-4.12442	3	0	ATIGNM[147]APEYGATM[147]GFFPVDEK
										DLMTEPVGK	0.0156	1004.48	1004.49	4.92591	2	0	DLM[147]TEPVGK
										VEGGITLHQPTGEELSIYDAAMK	0.0165	2474.2	2474.21	2.62307	3	0	VEGGITLHQPTGEELSIYDAAM[147]K
										TLTLDLGTVAPSLAGPK	0.0166	1652.93	1652.95	6.21682	2	0
										AAGLLPYLDK	0.0211	1059.6	1059.6	4.5725	2	0
										IERLPVSIR	0.0217	1081.66	1081.67	4.60773	3	1
										TIDYFR	0.023	813.402	813.407	6.49003	2	0
										FVEFFGEGTASLTTPDR	0.0252	1872.89	1872.88	-4.89725	2	0
										GQVYDWPK	0.0259	991.476	991.482	5.99308	2	0
										ALGVFGDSVTTDHISPAGSIK	0.0269	2071.06	2071.07	3.58029	3	0
										NALDLNMQLEFK	0.0273	1451.72	1451.7	-11.6662	2	0	NALDLNM[147]QLEFK
										DLMTEPVGK	0.0282	1004.48	1004.49	5.04736	2	0	DLM[147]TEPVGK
										ATIGNMAPEYGATMGFFPVDEK	0.0284	2377.06	2377.03	-12.2067	2	0	ATIGNM[147]APEYGATM[147]GFFPVDEK
										ANFLASPPLVVAYAIAGNVTR	0.0302	2143.18	2143.19	3.75984	3	0
										VHNGDVLIAAITSCTNTSNPSVLLAAGLLAK	0.0313	3120.67	3120.68	1.0533	4	0	VHNGDVLIAAITSC[160]TNTSNPSVLLAAGLLAK
										VHNGDVLIAAITSCTNTSNPSVLLAAGLLAK	0.0324	3119.66	3119.66	-2.7067	4	0	VHNGDVLIAAITSC[160]TNTSNPSVLLAAGLLAK
										GTQLLGVK	0.033	814.491	814.495	4.48746	2	0
										EGVTATDLVLTITEMLR	0.0385	1860.99	1860.99	2.38852	3	0
										TLTLDLGTVAPSLAGPK	0.039	1652.93	1652.93	-1.46346	2	0
										LREGVTATDLVLTITEMLR	0.0391	2147.17	2147.18	0.417293	3	1	LREGVTATDLVLTITEM[147]LR
										EGVTATDLVLTITEMLR	0.041	1875.97	1875.96	-4.89986	2	0	EGVTATDLVLTITEM[147]LR
										ANFLASPPLVVAYAIAGNVTR	0.0433	2143.18	2143.19	2.8831	2	0
										SLFAKPVAENGFNKDVADLDR	0.0463	2305.17	2305.18	5.65511	4	1
	ABF08326.1	Rmet_1443	Cupriavidus metallidurans CH34	outer membrane protein assembly factor,outer membrane protein, surface antigen OMA87	88359.8	8.75031	14	26.9279	376.991	FQFQIGTAF	8.23e-06	1058.53	1058.53	-1.13459	2	0
										ASLQQQYFYPLSK	4.36e-05	1571.8	1571.81	6.31697	2	0
										TIALTQYDPYFTVDGISR	6.69e-05	2060.03	2060.05	7.23386	2	0
										QDNVFGSGTSLGLDVNTAK	0.000118	1921.94	1921.95	3.59377	2	0
										AITDLLGTYGYAFTTINPQPQVDK	0.000119	2626.34	2626.36	6.15114	3	0
										GPYTQANLEVGVPGGDTQYYR	0.000207	2284.08	2284.08	3.3125	2	0
										VGETFTDDKGADAIR	0.000255	1593.76	1593.77	4.16436	3	1
										GYYAAEVQTTVTPVDR	0.00412	1768.86	1768.88	7.49577	2	0
										LTADLEALR	0.00751	1000.56	1000.56	4.71938	2	0
										ALYNTGFFK	0.00806	1059.54	1059.54	4.47648	2	0
										YFYAGGIGSVR	0.00981	1188.59	1188.6	6.46058	2	0
										MIGNVEFVFPLPGSGVDR	0.0122	1949.98	1949.99	4.56825	2	0	M[147]IGNVEFVFPLPGSGVDR
										EVALTLMVDPGR	0.018	1315.68	1315.69	8.86385	2	0	EVALTLM[147]VDPGR
										TQVYTSPNTPNQYTAWLQK	0.0371	2240.1	2240.09	-3.3869	2	0
	ABF10106.1	Rmet_3234	Cupriavidus metallidurans CH34	outer membrane protein (porin)	41949.2	8.9723	9	35.6608	320.948	DGSTLGTSSASPGSLGGSGFGTTLGSYNQFGAMVGLR	2.43e-07	3511.65	3511.68	7.40705	3	0	DGSTLGTSSASPGSLGGSGFGTTLGSYNQFGAM[147]VGLR
										TSIAGTYAFGPAK	4.13e-07	1282.66	1282.66	4.65051	2	0
										TDAYFNVAYTK	2.78e-06	1291.61	1291.61	3.61178	2	0
										NTGADPWSFVVSTDYAFSK	9.93e-06	2090.96	2090.97	5.7476	2	0
										NKDGSTLGTSSASPGSLGGSGFGTTLGSYNQFGAMVGLR	1.11e-05	3754.8	3754.8	-0.663684	3	1	NKDGSTLGTSSASPGSLGGSGFGTTLGSYNQFGAM[147]VGLR
										QAFVGMQSQFGTLTLGR	2.59e-05	1855.93	1855.93	3.07502	2	0	QAFVGM[147]QSQFGTLTLGR
										RTDAYFNVAYTK	0.000109	1448.72	1448.72	-0.673009	2	1
										RTDAYFNVAYTK	0.0016	1447.71	1447.71	2.49152	3	1
										QAFVGMQSQFGTLTLGR	0.00173	1839.93	1839.94	5.83609	2	0
										GVFVLESGFNVDTGTSGQNNR	0.00254	2197.04	2197.05	6.76228	3	0
										QAFVGMQSQFGTLTLGR	0.00311	1839.93	1839.9	-14.0011	2	0
										YAHAQGGAVLPGGVNTVDGAAK	0.0155	2053.05	2053.05	1.34434	2	0
										DGSTLGTSSASPGSLGGSGFGTTLGSYNQFGAMVGLR	0.0367	3495.66	3495.66	0.0803854	3	0
	P13645.6		Homo sapiens	Keratin, type I cytoskeletal 10	58826.4	5.13429	9	23.2877	209.589	GSLGGGFSSGGFSGGSFSR	4.08e-07	1706.76	1706.77	3.50663	2	0
										ELTTEIDNNIEQISSYK	5.87e-07	1996.97	1996.98	2.47024	2	0
										NVSTGDVNVEMNAAPGVDLTQLLNNMR	1.24e-06	2873.4	2873.38	-9.07287	3	0
										ALEESNYELEGK	6.72e-06	1380.64	1380.65	3.32527	2	0
										NVSTGDVNVEMNAAPGVDLTQLLNNMR	1.1e-05	2887.38	2887.4	6.21532	3	0	NVSTGDVNVEMNAAPGVDLTQLLNNM[147]R
										QSLEASLAETEGR	0.000163	1389.67	1389.68	4.28302	2	0
										SKELTTEIDNNIEQISSYK	0.000701	2211.09	2211.1	6.01106	3	1
										LENEIQTYR	0.000776	1164.58	1164.58	-0.955711	2	0
										NVQALEIELQSQLALK	0.00105	1797.01	1797.02	4.90036	2	0
										NVQALEIELQSQLALK	0.00147	1796	1796.01	2.67928	3	0
										NQILNLTTDNANILLQIDNAR	0.0025	2367.26	2367.27	1.34839	3	0
										ALEESNYELEGK	0.00273	1380.64	1380.65	3.76782	2	0
										NVSTGDVNVEMNAAPGVDLTQLLNNMR	0.0167	2889.4	2889.39	-1.25839	3	0	NVSTGDVNVEM[147]NAAPGVDLTQLLNNMR
	ABF07253.1	Rmet_0367	Cupriavidus metallidurans CH34	Putative Fe-S oxidoreductase FAD/FMN-containing dehydrogenase oxidoreductase protein	147684	8.31502	12	12.5378	150.453	TVCLEFFGQPR	6.18e-05	1353.66	1353.67	4.64665	2	0	TVC[160]LEFFGQPR
										MVLIGDIVGDDEDAVAR	6.74e-05	1802.87	1802.87	-1.27075	2	0	M[147]VLIGDIVGDDEDAVAR
										LTDELEAFFAR	7.36e-05	1310.65	1310.66	3.58753	2	0
										VEYPFVVLTPDTEEEIAGLVK	0.000205	2347.22	2347.24	7.68569	3	0
										INEDVVIPLPR	0.000206	1263.72	1263.73	5.63179	2	0
										KVATIFSGAGVVTR	0.000477	1404.81	1404.81	3.4688	3	1
										LEFLTEDEISEFR	0.0034	1626.78	1626.78	1.32962	2	0
										SDDANEIPSAELLEDR	0.00396	1772.81	1772.81	4.77379	2	0
										YLQDHLDTPLAAAR	0.00972	1582.81	1582.82	4.95385	3	0
										NPYLQDDLLENPK	0.0166	1557.77	1557.77	3.88055	2	0
										SGEGFIAVSPEAR	0.0281	1318.65	1318.67	13.6829	2	0
										EIPYNYTSFSDR	0.0374	1490.67	1490.67	0.68627	2	0
	ABF11414.1	Rmet_4549	Cupriavidus metallidurans CH34	Excinuclease ABC, A subunit (UvrA family protein) (plasmid)	212899	6.32653	13	10.4135	135.375	GYTAGTFSFNSGDGR	1.41e-06	1535.66	1535.67	4.57848	2	0
										YADPQPALFSFNSAYGACDACR	9.03e-06	2481.06	2481.06	1.11001	2	0	YADPQPALFSFNSAYGAC[160]DAC[160]R
										DAGNTLVVVEHDPSVMLAADR	5.69e-05	2224.08	2224.09	4.27413	3	0	DAGNTLVVVEHDPSVM[147]LAADR
										LAGFLAEAAQAQPVK	9.55e-05	1512.83	1512.85	12.6835	2	0
										VIGVDLGLVIPDVR	0.000273	1463.87	1463.87	-0.400308	2	0
										LGQPVPTLSGGEAQR	0.000274	1508.79	1508.8	4.49432	2	0
										DVTVEIPLNR	0.000342	1154.63	1154.62	-5.43378	2	0
										YVETFSAYAR	0.00144	1205.57	1205.57	1.67224	2	0
										ELVGADQVDDVVFVDQSPIGK	0.0065	2229.12	2229.12	1.11479	3	0
										VSVHVVTDEGEGPVWK	0.00811	1736.87	1736.88	3.73833	3	0
										ELVGADQVDDVVFVDQSPIGK	0.00826	2229.12	2229.12	-0.303259	2	0
										VTDTSDWQLRPIDAATPR	0.0115	2041.02	2041.04	8.21402	3	0
										ALEAIEASLK	0.017	1043.59	1043.59	-0.349755	2	0
										FFDDLTLPSALLDDALK	0.0224	1892.98	1892.98	0.645016	2	0
	P35908.2		Homo sapiens	Keratin, type II cytoskeletal 2 epidermal	65432.1	8.07353	7	16.7449	117.214	NVQDAIADAEQR	3.09e-05	1328.63	1328.64	4.95848	2	0
										VLYDAEISQIHQSVTDTNVILSMDNSR	4.77e-05	3064.49	3064.5	4.01176	3	0	VLYDAEISQIHQSVTDTNVILSM[147]DNSR
										DVDNAYMIK	6.15e-05	1083.49	1083.49	3.20077	2	0	DVDNAYM[147]IK
										NLDLDSIIAEVK	7.49e-05	1328.72	1328.73	5.40295	2	0
										YEELQVTVGR	0.000316	1192.61	1192.61	2.91462	2	0
										VDLLNQEIEFLK	0.000328	1459.79	1459.8	5.91249	2	0
										DVDNAYMIK	0.000416	1067.5	1067.5	4.5321	2	0
										MSGDLSSNVTVSVTSSTISSNVASK	0.00114	2473.19	2473.2	4.4566	2	0	M[147]SGDLSSNVTVSVTSSTISSNVASK
										VLYDAEISQIHQSVTDTNVILSMDNSR	0.0262	3048.49	3048.49	-0.202723	3	0
	YP_145585.1	-	Cupriavidus metallidurans CH34	putative cytochrome C (plasmid)	78242	8.93029	7	15.9341	111.538	TPFGTLYSTNITPDAATGIGR	3.83e-08	2152.08	2152.09	4.59602	2	0
										YFLAGETVEGWR	4.89e-07	1426.69	1426.7	5.45389	2	0
										GVAPVQLANKPLGMSFPFNQR	8.74e-05	2286.19	2286.21	4.86048	3	0	GVAPVQLANKPLGM[147]SFPFNQR
										LDDGEIADIVNFTR	0.000104	1576.77	1576.78	6.03004	2	0
										YTFEQFDR	0.000827	1104.49	1104.49	3.11276	2	0
										GVAADGHNLYPAMPYPSYAK	0.0117	2136.99	2137	4.19655	3	0	GVAADGHNLYPAM[147]PYPSYAK
										HGIVSGNMVDVVQHSTQYMR	0.0351	2289.06	2289.08	6.04833	4	0	HGIVSGNM[147]VDVVQHSTQYM[147]R
	P00761.1	-	Sus Scrofa	Trypsin	24409.2	6.99753	4	25.1082	100.433	LGEHNIDVLEGNEQFINAAK	1.36e-07	2210.1	2210.11	3.76228	2	0
										LGEHNIDVLEGNEQFINAAK	7.16e-06	2210.1	2210.11	4.0324	3	0
										LGEHNIDVLEGNEQFINAAK	8.94e-05	2210.1	2210.11	4.61247	3	0
										LGEHNIDVLEGNEQFINAAK	0.000105	2210.1	2210.11	4.28081	3	0
										LGEHNIDVLEGNEQFINAAK	0.000435	2210.1	2210.08	-6.29022	2	0
										LGEHNIDVLEGNEQFINAAK	0.00108	2210.1	2210.12	9.16928	3	0
										IITHPNFNGNTLDNDIMLIK	0.00267	2298.17	2298.18	4.25078	3	0	IITHPNFNGNTLDNDIM[147]LIK
										LGEHNIDVLEGNEQFINAAK	0.00283	2210.1	2210.11	5.60654	3	0
										IITHPNFNGNTLDNDIMLIK	0.00995	2282.17	2282.18	4.80069	3	0
										LGEHNIDVLEGNEQFINAAK	0.0111	2211.1	2211.11	1.63448	3	0
										VATVSLPR	0.0139	841.502	841.507	5.1717	2	0
										LSSPATLNSR	0.0143	1044.56	1044.56	3.15253	2	0
										LGEHNIDVLEGNEQFINAAK	0.0155	2211.1	2211.11	2.95961	3	0
										VATVSLPR	0.0332	841.502	841.506	4.5193	2	0
	ABF08762.1	Rmet_1883	Cupriavidus metallidurans CH34	DNA-binding ATP-dependent protease La	89103.2	6.30208	8	11.9552	95.6413	APILCLVGPPGVGK	2.76e-06	1376.78	1376.79	2.93655	2	0	APILC[160]LVGPPGVGK
										IPPEILTSLSGIDEAGR	0.00445	1768.96	1768.94	-8.91599	2	0
										ILEYLAVQQR	0.00882	1231.69	1231.7	2.28466	2	0
										DLADIPDNVK	0.00983	1098.56	1098.56	5.16223	2	0
										ADVAMTGEITLR	0.0138	1291.64	1291.65	4.02588	2	0	ADVAM[147]TGEITLR
										LSGYTEDEKVNIATR	0.0393	1694.85	1694.85	4.26528	3	1
										VLELALER	0.0435	941.555	941.559	4.88129	2	0
										GEVLPIGGLK	0.0469	982.594	982.592	-2.19419	2	0
	ABF09317.1	Rmet_2440	Cupriavidus metallidurans CH34	fused ribonucleaseE: endoribonuclease; RNA-binding protein; RNA degradosome binding protein	112881	5.50259	8	9.9325	79.46	DTESSALQVLR	2.74e-05	1217.63	1217.63	5.64459	2	0
										LIDIDIETAGR	5.69e-05	1214.65	1214.66	3.56975	2	0
										GAALTTFISLAGR	0.000112	1276.71	1276.72	2.02865	2	0
										IEPSLEACFVNYGEER	0.000154	1911.87	1911.88	6.38695	2	0	IEPSLEAC[160]FVNYGEER
										MLFNATQQEELR	0.000348	1494.71	1494.71	-1.51467	2	0	M[147]LFNATQQEELR
										AFMSVVMPDNMSR	0.000565	1531.65	1531.65	3.71104	2	0	AFM[147]SVVM[147]PDNM[147]SR
										IEPSLEACFVNYGEER	0.00304	1912.88	1912.89	6.9257	3	0	IEPSLEAC[160]FVNYGEER
										ETMAQLQVPEGMSIIAR	0.00504	1888.94	1888.95	7.96955	2	0	ETM[147]AQLQVPEGMSIIAR
										YLVLMPNNPR	0.00515	1231.64	1231.65	6.41422	2	0	YLVLM[147]PNNPR
										ETMAQLQVPEGMSIIAR	0.0274	1905.94	1905.94	-1.75556	3	0	ETM[147]AQLQVPEGM[147]SIIAR
	ABF08863.1	Rmet_1984	Cupriavidus metallidurans CH34	L-Aspartate decarboxylase	60464.7	6.62803	5	15.6134	78.0669	SNLFDEQLANLPK	1.1e-05	1487.76	1487.77	4.70976	2	0
										GMGVAPEAVDENVVDYYTLLDVEQMSR	0.000144	3033.39	3033.39	-2.44314	3	0	GM[147]GVAPEAVDENVVDYYTLLDVEQM[147]SR
										LAEEAGVVLLPGGGFGTR	0.000433	1741.94	1741.94	3.83596	2	0
										FLTGAVSYVR	0.00479	1111.6	1111.6	-1.17218	2	0
										YSSITTEPEKLPFIDR	0.0138	1895.98	1895.98	4.43202	3	1
	ABF08004.1	Rmet_1118	Cupriavidus metallidurans CH34	ferric alcaligin E	91156	8.87611	6	10.7271	64.3623	GGNVDQAMQDSEVFGSR	2e-06	1811.77	1811.78	3.6169	2	0	GGNVDQAM[147]QDSEVFGSR
										IYGVEASADYLSTDER	4e-05	1787.82	1787.83	5.8781	2	0
										NLANIDPALVER	0.000332	1323.71	1323.72	3.34362	2	0
										ALDGLQLADQNQIR	0.00364	1553.82	1553.82	5.00638	2	0
										DVSSYTTLDLISSYQVTK	0.00503	2020.01	2020	-4.08413	2	0
										ASFSDFVPLSQSR	0.0473	1440.71	1440.7	-5.45078	2	0
	P01834.1		Homo sapiens	Ig kappa chain C region	11608.7	5.58418	2	32.0755	64.1509	VDNALQSGNSQESVTEQDSK	4.24e-05	2134.96	2134.97	4.03614	2	0
										VDNALQSGNSQESVTEQDSK	0.000169	2134.96	2134.97	3.14385	3	0
										VDNALQSGNSQESVTEQDSKDSTYSLSSTLTLSK	0.00192	3619.71	3619.73	5.19517	3	1
	ABF10135.1	Rmet_3263	Cupriavidus metallidurans CH34	glutamate synthase, large subunit	178072	6.35675	8	6.74433	53.9546	ALLADWTTAR	7.29e-05	1116.59	1116.59	0.0994096	2	0
										NSGATAVVEGTGDHGCEYMTGGTVVVLGGTGR	0.00135	3126.43	3126.41	-7.99473	3	0	NSGATAVVEGTGDHGC[160]EYM[147]TGGTVVVLGGTGR
										VSFIQPVK	0.00176	916.538	916.543	5.56987	2	0
										NVNPVSDISVK	0.00301	1170.62	1170.63	4.82478	2	0
										EYANIINDQSR	0.00512	1322.63	1322.63	-1.96577	2	0
										TSAGLVVETGSAR	0.00601	1246.65	1246.66	3.70272	2	0
										TFDELIGR	0.00756	949.487	949.492	5.22387	2	0
										FGVTAEYLASADQIQIK	0.0357	1852.96	1852.98	11.0931	2	0
	P04264.6	-	Homo sapiens	Keratin, type II cytoskeletal 1	66037.9	8.15059	5	9.93789	49.6894	QISNLQQSISDAEQR	8.69e-06	1715.84	1715.86	9.32253	2	0
										SLDLDSIIAEVK	0.00013	1301.71	1301.71	4.13457	2	0
										YEELQITAGR	0.000141	1178.59	1178.6	5.14597	2	0
										NMQDMVEDYR	0.000279	1315.52	1315.52	0.0266055	2	0	NMQDM[147]VEDYR
										SGGGFSSGSAGIINYQR	0.000514	1656.79	1656.78	-3.81944	2	0
										QISNLQQSISDAEQR	0.0175	1715.84	1715.85	6.46912	3	0
	ABF10441.1	Rmet_3569	Cupriavidus metallidurans CH34	DNA topoisomerase III	98617.4	8.73432	5	7.63187	38.1594	NTLGLAQALYEK	0.000222	1319.71	1319.72	5.97708	2	0
										YNEATLLSAMEGAGK	0.000445	1569.73	1569.73	-0.381593	2	0	YNEATLLSAM[147]EGAGK
										DVTALINACDAGR	0.00105	1374.66	1374.66	5.19475	2	0	DVTALINAC[160]DAGR
										LWLQSMTPQAIR	0.0193	1458.77	1458.77	3.71547	2	0	LWLQSM[147]TPQAIR
										ALIIAEKPSVAADIAR	0.0314	1636.95	1636.95	1.74471	3	0
	ABF07723.1	Rmet_0837	Cupriavidus metallidurans CH34	hydroxamate-type ferrisiderophore receptor	81740.7	7.14609	4	8.3004	33.2016	ANLNTSTSIDQGVGSASTYR	0.000152	2041.98	2042	9.95946	2	0
										LNYQSSFNVAR	0.000935	1297.64	1297.65	8.14863	2	0
										GPSGETFGVGNIGGLINQSTK	0.00584	2034.04	2034.04	2.84459	2	0
										LGVTGAIFQTK	0.0243	1133.64	1133.65	6.71639	2	0
	ABF10060.1	Rmet_3188	Cupriavidus metallidurans CH34	unassigned peptidase, M61 subfamily (glycyl aminopeptidase)	66523.9	7.19105	3	7.28477	21.8543	ALTEGTGEIGLVPLFR	0.00127	1671.92	1671.92	0.923489	2	0
										TGLVTDQQYVEMLGK	0.00209	1697.84	1697.84	1.39059	2	0	TGLVTDQQYVEM[147]LGK
										QSVADSSFDAWTK	0.0073	1440.65	1440.65	1.06618	2	0
	P02788.6	-	Homo sapiens	Lactotransferrin	78181.1	8.50357	3	6.90141	20.7042	DVTVLQNTDGNNNEAWAK	2.01e-06	1987.92	1987.93	5.16267	2	0
										ADAVTLDGGFIYEAGLAPYK	0.000174	2071.04	2071.04	2.30802	2	0
										SDTSLTWNSVK	0.00384	1236.6	1236.6	1.75643	2	0
	P02768.2	-	Homo sapiens	Serum albumin	69366	5.91699	3	6.89655	20.6897	VPQVSTPTLVEVSR	0.0016	1510.84	1510.85	8.34638	2	0
										LVAASQAALGL	0.00197	1012.59	1012.6	5.92045	2	0
										VFDEFKPLVEEPQNLIK	0.00286	2045.1	2045.1	1.11095	3	0
	ABF07599.1	Rmet_0713	Cupriavidus metallidurans CH34	DNA gyrase (type II topoisomerase), subunit A	99074.3	5.18982	3	6.57748	19.7324	TVLTDFSNPR	0.00114	1148.58	1148.59	5.97519	2	0
										LSDGQAQEILQMR	0.00197	1503.74	1503.74	3.46005	2	0	LSDGQAQEILQM[147]R
										IVESDADNGSGAEEGEAADDAAGATDAGATDAGANS	0.00554	3251.31	3251.34	10.8329	3	0
	ABF09623.1	Rmet_2750	Cupriavidus metallidurans CH34	phosphoenolpyruvate carboxylase	111758	8.62081	4	4.75719	19.0287	EQEGDAAFDLVETIR	0.000353	1691.8	1691.8	1.52796	2	0
										GAAPTAAATTIPAR	0.00138	1267.69	1267.7	5.58497	2	0
										DLVYETPGFK	0.0157	1167.58	1167.58	2.36986	2	0
										LADNPLLAR	0.0228	981.561	981.562	1.21643	2	0
	ABF08240.1	Rmet_1357	Cupriavidus metallidurans CH34	Acetyl-CoA acetyltransferase (Acetoacetyl-CoA thiolase)	40725.6	7.65334	2	8.39695	16.7939	AYANAGVDPAVMGMGPVPASK	0.000197	2033.96	2033.98	10.8193	2	0	AYANAGVDPAVM[147]GM[147]GPVPASK
										IPAPELGAIVIK	0.00358	1219.75	1219.76	1.89464	2	0
	ABF08971.1	Rmet_2092	Cupriavidus metallidurans CH34	exoribonuclease R, RNase R	98176.9	9.07839	3	5.47945	16.4384	TSGSPLSAGDIAK	0.00239	1203.62	1203.63	5.34304	2	0
										DFDDAVYCEQVK	0.0155	1487.62	1487.62	0.502143	2	0	DFDDAVYC[160]EQVK
										TAGLSLGGGDKPQASDYAEVMDK	0.0406	2326.09	2326.07	-6.2977	3	0	TAGLSLGGGDKPQASDYAEVM[147]DK
	Q1LI21.1	Rmet_3333	Cupriavidus metallidurans CH34	DNA-directed RNA polymerase subunit beta'	155725	6.60865	4	4.10474	16.419	LGIQAFEPVLIEGK	0.00448	1512.86	1512.86	0.979605	2	0
										ITEYEVVNKDADGDAR	0.00463	1793.84	1793.85	2.988	3	1
										YNNVVDIWGAAGDQVGK	0.0101	1805.88	1805.87	-4.27935	2	0
										FATSDLNDLYR	0.0116	1313.63	1313.63	6.71881	2	0
	P01876.2	-	Homo sapiens	Ig alpha-1 chain C region	37654.2	6.07905	2	6.79887	13.5977	DASGVTFTWTPSSGK	2.05e-05	1539.72	1539.73	5.87769	2	0
										TPLTATLSK	0.0291	930.539	930.541	2.89832	2	0
	Q8TDL5.1	-	Homo sapiens	BPI fold-containing family B member 1	52440.9	6.72123	2	5.78512	11.5702	ALGFEAAESSLTK	0.000158	1322.67	1322.67	2.16153	2	0
										IPLDMVAGFNTPLVK	0.00261	1629.88	1629.89	5.45316	2	0	IPLDM[147]VAGFNTPLVK
	P13647.3	-	Homo sapiens	Keratin, type II cytoskeletal 5	62377.6	7.58353	2	4.23729	8.47458	ISISTSGGSFR	0.000949	1110.57	1110.57	5.1037	2	0
										SFSTASAITPSVSR	0.00867	1409.72	1409.72	1.47477	2	0
	ABF09815.1	Rmet_2942	Cupriavidus metallidurans CH34	ATP-dependent DNA helicase	80550.9	7.36887	2	3.79919	7.59837	LLHNPPQQESEAALADR	0.000515	1887.94	1887.96	6.68134	3	0
										AVTPGEPLPDR	0.0204	1150.6	1150.6	5.83696	2	0
	ABF10403.1	Rmet_3531	Cupriavidus metallidurans CH34	large extracellular alpha-helicalprotein	214738	8.61589	3	2.10738	6.32213	SCDGELLGEGATDATGVVR	9.22e-05	1905.87	1905.88	5.85663	2	0	SC[160]DGELLGEGATDATGVVR
										SVSLLEGVSGAK	0.00671	1146.64	1146.63	-1.76167	2	0
										LTTAALPPLAK	0.0349	1094.67	1094.68	7.20217	2	0
	ABF08298.1	Rmet_1415	Cupriavidus metallidurans CH34	Aldehyde oxidase	102714	6.76145	2	2.23167	4.46334	FTDLPVTAEK	0.00352	1119.58	1119.58	3.12528	2	0
										NDLATVAIASR	0.00367	1129.61	1129.62	5.59043	2	0
218	ABF08082.1	Rmet_1196	Cupriavidus metallidurans CH34	pyruvate decarboxylase, E1 component of the pyruvate dehydrogenase complex	100668	5.82076	33	43.7989	1445.36	MMECVDGEYQTFK	2.25e-09	1668.65	1668.66	5.84965	2	0	M[147]M[147]EC[160]VDGEYQTFK
										MMECVDGEYQTFK	8.99e-08	1652.65	1652.67	8.729	2	0	M[147]MEC[160]VDGEYQTFK
										VWAFLGDGETDEPESLGAIGMAGR	1.03e-07	2493.15	2493.17	7.23182	3	0	VWAFLGDGETDEPESLGAIGM[147]AGR
										MMECVDGEYQTFK	1.24e-07	1652.65	1652.66	4.81469	2	0	M[147]MEC[160]VDGEYQTFK
										MMECVDGEYQTFK	1.39e-07	1668.65	1668.65	4.09374	2	0	M[147]M[147]EC[160]VDGEYQTFK
										IGDLCWAAADMR	3.03e-07	1393.61	1393.62	4.86864	2	0	IGDLC[160]WAAADM[147]R
										MMECVDGEYQTFK	4.92e-07	1652.65	1652.66	5.77496	2	0	M[147]MEC[160]VDGEYQTFK
										MMECVDGEYQTFK	7.44e-07	1668.65	1668.65	4.23996	2	0	M[147]M[147]EC[160]VDGEYQTFK
										IGDLCWAAADMR	1.05e-06	1393.61	1393.62	3.9925	2	0	IGDLC[160]WAAADM[147]R
										GPVIASTDYIR	1.17e-06	1190.63	1190.63	3.75348	2	0
										HVVPIVPDESR	1.9e-06	1246.67	1246.67	2.92139	2	0
										DWGVESDLWSCPSFTELAR	3.81e-06	2255.01	2255.01	0.552105	2	0	DWGVESDLWSC[160]PSFTELAR
										YVVLGTDGFGR	4.04e-06	1182.6	1182.61	4.16623	2	0
										APSEQSGGDLVFVQGHSAPGVYSR	4.52e-06	2444.17	2444.18	3.93221	3	0
										APSEQSGGDLVFVQGHSAPGVYSR	8.24e-06	2444.17	2444.19	6.25447	3	0
										IGDLCWAAADMR	8.39e-06	1393.61	1393.62	3.72988	2	0	IGDLC[160]WAAADM[147]R
										MMECVDGEYQTFK	1.38e-05	1636.66	1636.67	6.59332	2	0	MMEC[160]VDGEYQTFK
										HVVPIVPDESR	1.48e-05	1246.67	1246.67	3.9	2	0
										IGDLCWAAADMR	1.51e-05	1377.62	1377.63	6.0082	2	0	IGDLC[160]WAAADMR
										AMVADWSDDDIWR	1.55e-05	1594.67	1594.68	5.06562	2	0	AM[147]VADWSDDDIWR
										APSEQSGGDLVFVQGHSAPGVYSR	2.63e-05	2444.17	2444.18	1.60995	3	0
										DIVQGMYQFR	4.26e-05	1271.6	1271.6	3.88252	2	0	DIVQGM[147]YQFR
										VPELSAFEALIK	5.78e-05	1315.74	1315.74	4.2592	2	0
										GQPTLILAK	6.6e-05	939.575	939.58	4.71383	2	0
										APSEQSGGDLVFVQGHSAPGVYSR	6.92e-05	2446.19	2446.19	2.17318	2	0
										DIVQGMYQFR	0.000104	1255.6	1255.61	4.05065	2	0
										VWAFLGDGETDEPESLGAIGMAGR	0.000126	2479.17	2479.17	-0.234756	2	0
										DIVQGMYQFR	0.000138	1271.6	1271.6	3.01825	2	0	DIVQGM[147]YQFR
										VWAFLGDGETDEPESLGAIGMAGR	0.000139	2495.16	2495.17	2.20226	2	0	VWAFLGDGETDEPESLGAIGM[147]AGR
										DIVQGMYQFR	0.000149	1271.6	1271.6	4.74679	2	0	DIVQGM[147]YQFR
										DQFNIPVADDKLEEVPYLTFPEGSK	0.00019	2851.4	2851.42	6.05	3	1
										IGDLCWAAADMR	0.000192	1393.61	1393.62	4.08005	2	0	IGDLC[160]WAAADM[147]R
										YNLDPNKPNPMSV	0.000348	1503.7	1503.71	3.55057	2	0	YNLDPNKPNPM[147]SV
										YNLDPNKPNPMSV	0.000451	1503.7	1503.71	3.79463	2	0	YNLDPNKPNPM[147]SV
										MDLGGYLPAR	0.000509	1091.54	1091.55	3.19089	2	0
										MDLGGYLPAR	0.000558	1107.54	1107.54	3.67211	2	0	M[147]DLGGYLPAR
										EHFFNTPELK	0.000622	1260.61	1260.62	5.0174	2	0
										EHFFNTPELK	0.000883	1260.61	1260.62	7.24409	2	0
										ALADEGAIGR	0.00104	971.504	971.509	5.7447	2	0
										YWVTVAALK	0.00131	1049.59	1049.6	4.37027	2	0
										LDNLVFVINCNLQR	0.00132	1717.91	1717.91	2.02107	2	0	LDNLVFVINC[160]NLQR
										QVGIWNQEGQK	0.00146	1285.64	1285.65	3.95211	2	0
										DIVQGMYQFR	0.00151	1271.6	1271.6	4.26629	2	0	DIVQGM[147]YQFR
										YNLDPNKPNPMSV	0.00175	1488.72	1488.71	-3.43853	2	0
										HVVPIVPDESR	0.00187	1246.67	1246.67	3.70428	2	0
										AMVADWSDDDIWR	0.00207	1579.69	1579.68	-1.50663	2	0
										MDLGGYLPAR	0.00231	1107.54	1107.54	5.43548	2	0	M[147]DLGGYLPAR
										VNGVTQPFHAETPYINTIPVEQQAR	0.00242	2809.43	2809.42	-1.70319	3	0
										LTPEQLDSFR	0.00267	1204.61	1204.61	3.69664	2	0
										DIVQGMYQFR	0.00274	1271.6	1271.6	1.96289	2	0	DIVQGM[147]YQFR
										DQFNIPVADDK	0.00329	1260.6	1260.61	5.69253	2	0
										AMVADWSDDDIWR	0.00396	1594.67	1594.67	0.24331	2	0	AM[147]VADWSDDDIWR
										YNLDPNKPNPMSV	0.00413	1503.7	1503.71	5.25569	2	0	YNLDPNKPNPM[147]SV
										VQLLGSGTIFR	0.00481	1189.68	1189.69	4.78111	2	0
										LDNLVFVINCNLQR	0.00549	1717.91	1717.91	0.521565	3	0	LDNLVFVINC[160]NLQR
										EVIAAADLLK	0.00576	1041.61	1041.61	4.00151	2	0
										EVSTTMAFVR	0.00608	1155.56	1155.57	4.98806	2	0	EVSTTM[147]AFVR
										YVPEDHDQLMFYK	0.00701	1699.76	1699.76	3.8229	2	0	YVPEDHDQLM[147]FYK
										EVSTTMAFVR	0.00976	1155.56	1155.57	5.83354	2	0	EVSTTM[147]AFVR
										EHFFNTPELK	0.0102	1259.61	1259.59	-15.2437	2	0
										EVIAAADLLKK	0.0115	1169.7	1169.71	4.8226	2	1
										RMMECVDGEYQTFK	0.0118	1825.76	1825.76	3.2529	3	1	RM[147]M[147]EC[160]VDGEYQTFK
										QVGIWNQEGQK	0.014	1285.64	1285.65	6.42092	2	0
										AFAEQIRPFVPR	0.0184	1429.78	1429.79	4.69022	3	0
										WNAMAMVLR	0.021	1122.53	1122.54	3.43955	2	0	WNAM[147]AM[147]VLR
										GYGMGDAGQAMNVAHQQK	0.0213	1893.81	1893.82	4.58916	3	0	GYGM[147]GDAGQAM[147]NVAHQQK
										VWAFLGDGETDEPESLGAIGMAGR	0.0248	2478.16	2478.19	12.5621	3	0
										WNAMAMVLR	0.0298	1106.54	1106.54	4.50595	2	0	WNAM[147]AMVLR
										KYNLDPNKPNPMSV	0.0473	1631.8	1631.8	3.642	3	1	KYNLDPNKPNPM[147]SV
										AMVADWSDDDIWR	0.0474	1594.67	1594.68	7.97468	2	0	AM[147]VADWSDDDIWR
										EVSTTMAFVR	0.0475	1139.56	1139.57	7.22381	2	0
	ABF09960.1	Rmet_3088	Cupriavidus metallidurans CH34	Ribonucleoside-diphosphate reductase alpha subunit	108462	5.7525	21	34.6272	727.171	MQTAQNEQQTTGVTGVAGAAAGIAQQSPVAAGVTYQDYK	1.24e-08	3925.88	3925.89	3.52762	3	0	M[147]QTAQNEQQTTGVTGVAGAAAGIAQQSPVAAGVTYQDYK
										WIDQAQSLNIYMAGASGK	5.09e-07	1967.94	1967.96	9.88241	2	0	WIDQAQSLNIYM[147]AGASGK
										AFEQAYLGYEAK	1.47e-05	1388.66	1388.66	1.75565	2	0
										EILGAEVTQTEMATK	5.93e-05	1635.8	1635.81	5.02872	2	0	EILGAEVTQTEM[147]ATK
										AFLAVNGGQGAGSAR	9.55e-05	1374.7	1374.7	-0.0872917	2	0
										VVNDTAVAVNQGGK	0.000112	1370.72	1370.72	1.80636	2	0
										NGAVVSFEPNK	0.000203	1160.58	1160.59	3.17858	2	0
										AFEQAYLGYEAK	0.000296	1388.66	1388.67	6.59052	2	0
										EILGAEVTQTEMATK	0.000301	1619.81	1619.81	2.53302	2	0
										NSNCIAIAPTATISNIIGVSACIEPTFQNLYVK	0.000483	3581.83	3581.83	-1.35015	3	0	NSNC[160]IAIAPTATISNIIGVSAC[160]IEPTFQNLYVK
										MQTAQNEQQTTGVTGVAGAAAGIAQQSPVAAGVTYQDYK	0.000485	3926.88	3926.89	2.04997	4	0	M[147]QTAQNEQQTTGVTGVAGAAAGIAQQSPVAAGVTYQDYK
										DIYATAFEVEPTWLVEAASR	0.000534	2267.11	2267.12	1.90374	2	0
										FADTSMEAVCYYAYQASTELAEER	0.000539	2821.2	2821.21	5.65505	3	0	FADTSM[147]EAVC[160]YYAYQASTELAEER
										TLIEKDPAYSQVTAR	0.000799	1690.89	1690.9	4.04166	3	1
										WIDQAQSLNIYMAGASGK	0.0011	1968.95	1968.96	4.04886	3	0	WIDQAQSLNIYM[147]AGASGK
										WIDQAQSLNIYMAGASGK	0.00154	1952.95	1952.94	-5.83577	2	0
										EIVEQLTQNVVR	0.00318	1426.78	1426.78	0.467487	2	0
										NLYDGVPMTQVYDSAILAAR	0.00726	2213.09	2213.09	1.41386	2	0	NLYDGVPM[147]TQVYDSAILAAR
										MLDNVIDINYYAVEK	0.00726	1814.88	1814.89	5.19815	2	0	M[147]LDNVIDINYYAVEK
										GIEAELLDEK	0.00863	1115.57	1115.57	0.65527	2	0
										TLIEKDPAYSQVTAR	0.0101	1690.89	1690.9	3.60875	3	1
										YAEYFPK	0.0101	916.433	916.436	3.207	2	0
										FAGGLGNDWTNVR	0.0144	1405.67	1405.68	3.86505	2	0
										SNLSGEFTVVNDYLVR	0.0175	1812.91	1812.91	-0.402115	2	0
										IEMPQAFFMR	0.0195	1300.59	1300.6	5.40445	2	0	IEM[147]PQAFFM[147]R
										YSTYEGSLWDR	0.0203	1375.6	1375.61	5.07341	2	0
										SQGVVPFLK	0.0433	973.56	973.561	1.81704	2	0
	P35527.3	-	Homo sapiens	Keratin, type I cytoskeletal 9	62063.6	5.13619	14	36.2761	507.865	GGSGGSHGGGSGFGGESGGSYGGGEEASGSGGGYGGGSGK	2.3e-07	3222.27	3222.29	5.15723	3	0
										GGGGSFGYSYGGGSGGGFSASSLGGGFGGGSR	1.38e-06	2704.15	2704.17	5.53297	2	0
										EIETYHNLLEGGQEDFESSGAGK	4.69e-05	2509.12	2509.15	8.35989	3	0
										QGVDADINGLR	0.000369	1156.58	1156.59	3.32704	2	0
										TLLDIDNTR	0.000384	1059.56	1059.56	4.46036	2	0
										EIETYHNLLEGGQEDFESSGAGK	0.000424	2510.13	2510.13	0.556146	3	0
										DQIVDLTVGNNK	0.000578	1314.68	1314.68	3.25479	2	0
										FSSSSGYGGGSSR	0.000778	1234.52	1234.53	6.43812	2	0
										VQALEEANNDLENK	0.000967	1585.76	1585.76	0.395394	2	0
										GGSGGSHGGGSGFGGESGGSYGGGEEASGSGGGYGGGSGK	0.00112	3223.28	3223.29	1.06941	3	0
										VQALEEANNDLENK	0.00133	1585.76	1585.77	5.39048	3	0
										IKFEMEQNLR	0.00202	1322.67	1322.67	5.45792	3	1	IKFEM[147]EQNLR
										EIETYHNLLEGGQEDFESSGAGK	0.00331	2509.12	2509.13	3.10547	3	0
										MTLDDFR	0.00423	896.406	896.41	4.72107	2	0
										DIENQYETQITQIEHEVSSSGQEVQSSAK	0.00547	3264.51	3264.52	1.54418	3	0
										HGVQELEIELQSQLSK	0.0118	1837.97	1837.97	1.30688	3	0
										TLLDIDNTR	0.0181	1059.56	1059.56	4.92187	2	0
										GGGGSFGYSYGGGSGGGFSASSLGGGFGGGSR	0.0201	2705.16	2705.19	10.9905	3	0
										MTLDDFR	0.0415	912.401	912.405	3.80534	2	0	M[147]TLDDFR
										FEMEQNLR	0.0444	1081.49	1081.49	6.27377	2	0	FEM[147]EQNLR
										QVLDNLTMEK	0.0464	1205.6	1205.6	3.94162	2	0	QVLDNLTM[147]EK
	P04264.6	-	Homo sapiens	Keratin, type II cytoskeletal 1	66037.9	8.15059	12	26.7081	320.497	GGGGGGYGSGGSSYGSGGGSYGSGGGGGGGR	3.34e-06	2383.95	2383.96	4.14564	2	0
										NMQDMVEDYR	5.71e-06	1315.52	1315.52	4.85208	2	0	NMQDM[147]VEDYR
										NMQDMVEDYR	4.47e-05	1299.52	1299.53	2.2085	2	0
										YEELQITAGR	8.07e-05	1178.59	1178.6	5.04245	2	0
										TNAENEFVTIK	8.72e-05	1264.63	1264.63	3.80111	2	0
										SLDLDSIIAEVK	9.69e-05	1301.71	1301.72	7.13601	2	0
										QISNLQQSISDAEQR	0.000134	1715.84	1715.86	6.69	2	0
										QISNLQQSISDAEQR	0.000153	1715.84	1715.85	4.91129	2	0
										LNDLEDALQQAK	0.000248	1356.69	1356.69	3.10536	2	0
										NMQDMVEDYR	0.000445	1315.52	1315.52	3.3675	2	0	NM[147]QDMVEDYR
										SLNNQFASFIDK	0.0011	1382.68	1382.69	3.39051	2	0
										DYQELMNTK	0.00168	1156.51	1156.51	4.66923	2	0	DYQELM[147]NTK
										GSYGSGGSSYGSGGGSYGSGGGGGGHGSYGSGSSSGGYR	0.00259	3311.3	3311.33	7.9129	3	0
										TNAENEFVTIK	0.00281	1264.63	1264.63	2.93208	2	0
										NMQDMVEDYR	0.00407	1315.52	1315.52	4.75934	2	0	NMQDM[147]VEDYR
										DYQELMNTK	0.00744	1140.51	1140.51	-5.51682	2	0
										TNAENEFVTIKK	0.015	1392.72	1392.73	4.8502	3	1
										NMQDMVEDYR	0.0193	1315.52	1315.52	3.27476	2	0	NMQDM[147]VEDYR
										AEAESLYQSKYEELQITAGR	0.0436	2286.13	2286.15	10.9067	3	1
										YEELQITAGR	0.0482	1178.59	1178.6	6.49249	2	0
	Q1LHM2.1	Rmet_3482	Cupriavidus metallidurans CH34	Glycine dehydrogenase (decarboxylating)	104818	5.90458	12	22.0739	264.887	NLFCSCVPLSEYAED	9.51e-08	1802.75	1802.76	6.62544	2	0	NLFC[160]SC[160]VPLSEYAED
										DGMSLGEFTAPLTEEAALGR	3.2e-06	2079.98	2079.99	4.62361	2	0	DGM[147]SLGEFTAPLTEEAALGR
										LVGVTIDAQGNK	1.91e-05	1213.67	1213.67	3.77863	2	0
										IGISFDETASR	0.000156	1194.59	1194.59	2.58918	2	0
										DGMSLGEFTAPLTEEAALGR	0.000175	2064.99	2065	4.79469	2	0
										VGPAADAAQAHAFGVLLQYPGVNGDVADYR	0.000604	3042.51	3042.52	3.37386	3	0
										AVPDFDTIEASVQDGFPATLAR	0.000696	2319.14	2319.14	0.435938	3	0
										LTATLAAGLK	0.000716	957.586	957.59	4.3004	2	0
										VEDGSFDREDNPLK	0.00123	1619.74	1619.74	-1.18043	2	1
										VVVVACDENGNVDLADLAK	0.00224	1999.99	2000.01	8.50555	2	0	VVVVAC[160]DENGNVDLADLAK
										SFIGQGYYNTLTPGVILR	0.00957	1998.06	1998.06	2.2637	2	0
										NIFENPAWYTAYTPYQPEISQGR	0.0108	2745.29	2745.32	7.96454	2	0
										AVPDFDTIEASVQDGFPATLAR	0.0162	2320.15	2320.14	-3.36746	2	0
										LVGVTIDAQGNK	0.0231	1213.67	1213.67	2.06894	2	0
										HASNTFYVAEDVLPQTLEVVR	0.0279	2388.22	2388.22	-1.78669	3	0
	P13645.6	-	Homo sapiens	Keratin, type I cytoskeletal 10	58826.4	5.13429	5	10.9589	54.7945	GSLGGGFSSGGFSGGSFSR	7.13e-07	1707.77	1707.78	2.72577	2	0
										QSLEASLAETEGR	1.87e-05	1389.67	1389.68	2.96544	2	0
										ALEESNYELEGK	4.37e-05	1380.64	1380.64	-1.36024	2	0
										VLDELTLTK	0.0194	1030.59	1030.6	7.23565	2	0
										QSVEADINGLR	0.0265	1200.61	1200.62	5.36477	2	0
	P35908.2	-	Homo sapiens	Keratin, type II cytoskeletal 2 epidermal	65432.1	8.07353	4	6.57277	26.2911	YEELQVTVGR	9.65e-05	1192.61	1192.61	4.34761	2	0
										VDLLNQEIEFLK	0.00458	1460.8	1460.8	1.73877	2	0
										LNDLEEALQQAK	0.00611	1371.71	1371.71	1.90565	2	0
										IEISELNR	0.0193	972.524	972.528	4.53048	2	0
	P00761.1	-	Sus Scrofa	Trypsin	24409.2	6.99753	2	12.1212	24.2424	LGEHNIDVLEGNEQFINAAK	1.69e-05	2210.1	2210.11	4.77807	3	0
										LGEHNIDVLEGNEQFINAAK	2.31e-05	2210.1	2210.11	4.52967	3	0
										LGEHNIDVLEGNEQFINAAK	4.42e-05	2210.1	2210.1	1.21533	3	0
										LGEHNIDVLEGNEQFINAAK	0.000382	2209.09	2209.09	-0.994075	2	0
										LGEHNIDVLEGNEQFINAAK	0.000434	2211.1	2211.09	-7.47454	3	0
										LGEHNIDVLEGNEQFINAAK	0.00571	2211.1	2211.12	6.85766	2	0
										VATVSLPR	0.0142	841.502	841.507	5.89779	2	0
										VATVSLPR	0.0338	841.502	841.506	4.08436	2	0
										LGEHNIDVLEGNEQFINAAK	0.0438	2212.11	2212.09	-11.1075	3	0
										VATVSLPR	0.0451	841.502	841.505	3.64824	2	0
	ABF07098.1	Rmet_0212	Cupriavidus metallidurans CH34	3-hydroxybutyryl-CoA dehydrogenase	30199	5.86501	2	11.9718	23.9437	GIATVAGSLDR	0.000782	1058.57	1058.58	4.24062	2	0
										QIDGIVGPDVIVASNTSSISITK	0.00239	2314.25	2314.26	3.49271	2	0
	P02533.4	-	Homo sapiens	Keratin, type I cytoskeletal 14	51560.9	5.08769	2	7.83898	15.678	APSTYGGGLSVSSSR	3.79e-05	1424.69	1424.7	5.63842	2	0
										LLEGEDAHLSSSQFSSGSQSSR	0.000786	2308.06	2308.07	5.19918	3	0
	ABF09369.1	Rmet_2492	Cupriavidus metallidurans CH34	aconitate hydratase 1	97943.8	6.58351	3	4.77248	14.3174	GQYYSLPQLGK	8.63e-05	1252.65	1252.65	7.15286	2	0
										YIAEGTPTVVFGGEEYGTGSSR	0.00131	2277.07	2277.08	3.63274	2	0
										AAGLLPYLDK	0.00512	1059.6	1059.6	6.8762	2	0
	ABF07971.1	Rmet_1085	Cupriavidus metallidurans CH34	cysteinyl-tRNA synthetase	54916.4	6.13886	2	6.10998	12.22	GLAYQATDGDVNYSVR	1.91e-05	1727.81	1727.82	5.38022	2	0
										SPLNYSDAHLDDAR	0.00518	1573.72	1573.71	-6.99296	3	0
	ABF11129.1	Rmet_4263	Cupriavidus metallidurans CH34	2-oxoacid dehydrogenase subunit E1 (plasmid)	99690.2	5.73196	3	3.25112	9.75336	IIQELESEFR	2.9e-05	1262.65	1262.66	10.1049	2	0
										GFLLGGTAGR	0.000965	947.519	947.519	0.0949849	2	0
										GFLLGGTAGR	0.00105	947.519	947.523	3.95982	2	0
										TFGMEGLFR	0.00351	1072.5	1072.51	4.02424	2	0	TFGM[147]EGLFR
										GFLLGGTAGR	0.00372	947.519	947.522	3.76668	2	0
										TFGMEGLFR	0.0056	1056.51	1056.51	3.30145	2	0
	ABF09853.1	Rmet_2980	Cupriavidus metallidurans CH34	transketolase 1, thiamin-binding protein	71086.5	5.80742	2	3.94537	7.89074	TADTTETAVAWAQSIR	0.00115	1719.84	1719.85	5.58888	2	0
										TADTTETAVAWAQSIR	0.00422	1719.84	1719.84	-1.69376	3	0
										ASVLPAGVPR	0.035	965.566	965.569	3.68178	2	0
	ABF10601.1	Rmet_3729	Cupriavidus metallidurans CH34	isocitrate dehydrogenase, NADP-dependent (plasmid)	82168.5	5.97151	2	2.81124	5.62249	LTQDPDTNIIK	0.0169	1256.66	1256.66	2.81381	2	0
										VPDNLAELGK	0.0338	1054.57	1054.56	-2.06815	2	0
219	ABF09369.1	Rmet_2492	Cupriavidus metallidurans CH34	aconitate hydratase 1	97943.8	6.58351	28	48.7236	1364.26	YIAEGTPTVVFGGEEYGTGSSR	2.17e-08	2276.06	2276.07	4.2723	2	0
										YIAEGTPTVVFGGEEYGTGSSR	2.43e-08	2276.06	2276.07	4.80875	2	0
										VEGGITLHQPTGEELSIYDAAMK	2.46e-08	2474.2	2474.21	4.54733	3	0	VEGGITLHQPTGEELSIYDAAM[147]K
										YIAEGTPTVVFGGEEYGTGSSR	2.76e-08	2276.06	2276.07	5.88166	2	0
										ATIGNMAPEYGATMGFFPVDEK	1.46e-07	2377.06	2377.07	4.02093	2	0	ATIGNM[147]APEYGATM[147]GFFPVDEK
										VEGGITLHQPTGEELSIYDAAMK	1.64e-07	2474.2	2474.21	2.62307	3	0	VEGGITLHQPTGEELSIYDAAM[147]K
										ATIGNMAPEYGATMGFFPVDEK	2.43e-07	2377.06	2377.07	4.73442	3	0	ATIGNM[147]APEYGATM[147]GFFPVDEK
										ALGVFGDSVTTDHISPAGSIK	8.04e-07	2071.06	2071.07	4.53005	2	0
										TDEEIAAFEGYFR	1.29e-06	1546.69	1546.7	3.91674	2	0
										ATIGNMAPEYGATMGFFPVDEK	1.45e-06	2377.06	2377.07	3.27085	3	0	ATIGNM[147]APEYGATM[147]GFFPVDEK
										TDEEIAAFEGYFR	2.24e-06	1546.69	1546.7	2.02238	2	0
										ATIGNMAPEYGATMGFFPVDEK	2.78e-06	2377.06	2377.07	4.32888	2	0	ATIGNM[147]APEYGATM[147]GFFPVDEK
										FVEFFGEGTASLTTPDR	3.23e-06	1872.89	1872.9	4.87963	2	0
										EGVTATDLVLTITEMLR	3.34e-06	1877.99	1878	5.19385	2	0	EGVTATDLVLTITEM[147]LR
										GQYYSLPQLGK	3.8e-06	1252.65	1252.65	3.64509	2	0
										DVADLDREYTNADGVK	4.21e-06	1779.83	1779.83	4.05433	3	1
										YIAEGTPTVVFGGEEYGTGSSR	5.01e-06	2276.06	2276.06	-0.340061	2	0
										ANFLASPPLVVAYAIAGNVTR	5.98e-06	2142.17	2142.17	-2.25005	2	0
										VEGGITLHQPTGEELSIYDAAMK	6.52e-06	2458.2	2458.22	4.38897	3	0
										DVADLDREYTNADGVK	7.15e-06	1779.83	1779.83	3.33403	3	1
										FVEFFGEGTASLTTPDR	7.65e-06	1872.89	1872.91	8.98558	2	0
										SNLVGMGVLPLQFK	9.92e-06	1517.83	1517.84	5.09281	2	0	SNLVGM[147]GVLPLQFK
										ATIGNMAPEYGATMGFFPVDEK	1.12e-05	2362.07	2362.07	-0.691342	2	0	ATIGNMAPEYGATM[147]GFFPVDEK
										EGVTATDLVLTITEMLR	1.17e-05	1860.99	1860.99	3.74049	2	0
										YIAEGTPTVVFGGEEYGTGSSR	1.86e-05	2276.06	2276.07	3.84348	2	0
										FVEFFGEGTASLTTPDR	2.66e-05	1872.89	1872.9	6.63947	2	0
										GQYYSLPQLGK	2.84e-05	1252.65	1252.65	4.42424	2	0
										SNLVGMGVLPLQFK	2.96e-05	1517.83	1517.83	3.96685	2	0	SNLVGM[147]GVLPLQFK
										FVEFFGEGTASLTTPDR	3.17e-05	1873.9	1873.9	3.84119	2	0
										EGVTATDLVLTITEMLR	3.21e-05	1876.98	1876.97	-7.36182	2	0	EGVTATDLVLTITEM[147]LR
										VVLQDFTGVPLLADLAAMR	4.49e-05	2029.12	2029.11	-1.68891	2	0
										VVLQDFTGVPLLADLAAMR	4.76e-05	2044.1	2044.11	4.0903	3	0	VVLQDFTGVPLLADLAAM[147]R
										ALGVFGDSVTTDHISPAGSIK	6.51e-05	2071.06	2071.08	11.4849	2	0
										NALDLNMQLEFK	6.68e-05	1450.71	1450.72	5.73511	2	0	NALDLNM[147]QLEFK
										YIAEGTPTVVFGGEEYGTGSSR	7.48e-05	2278.08	2278.07	-0.65011	2	0
										GQYYSLPQLGK	0.000104	1252.65	1252.66	8.22499	2	0
										VVLQDFTGVPLLADLAAMR	0.000108	2044.1	2044.11	4.03698	2	0	VVLQDFTGVPLLADLAAM[147]R
										FVEFFGEGTASLTTPDR	0.000119	1872.89	1872.9	5.72698	2	0
										TDEEIAAFEGYFR	0.000123	1547.7	1547.7	1.71351	2	0
										ATIGNMAPEYGATMGFFPVDEK	0.000128	2377.06	2377.08	6.28045	2	0	ATIGNM[147]APEYGATM[147]GFFPVDEK
										VDEIPFVVAR	0.00017	1143.63	1143.63	3.5842	2	0
										NALDLNMQLEFK	0.000197	1450.71	1450.72	4.47297	2	0	NALDLNM[147]QLEFK
										VEGGITLHQPTGEELSIYDAAMK	0.000222	2458.2	2458.22	4.24009	3	0
										STYIAEPPFFQDFALEPSGEAVTVR	0.000249	2770.35	2770.37	6.03931	3	0
										YIAEGTPTVVFGGEEYGTGSSR	0.000297	2276.06	2276.07	4.10578	3	0
										VVLQDFTGVPLLADLAAMR	0.000325	2044.1	2044.11	3.85793	2	0	VVLQDFTGVPLLADLAAM[147]R
										TLTLDLGTVAPSLAGPK	0.00042	1652.93	1652.94	5.62575	2	0
										YIAEGTPTVVFGGEEYGTGSSR	0.000444	2277.07	2277.06	-1.62094	2	0
										GQVYDWPK	0.000465	991.476	991.481	4.82412	2	0
										ATIGNMAPEYGATMGFFPVDEK	0.000482	2361.07	2361.08	6.64446	2	0	ATIGNM[147]APEYGATMGFFPVDEK
										VDEIPFVVAR	0.000541	1143.63	1143.63	3.26417	2	0
										TDEEIAAFEGYFR	0.000589	1547.7	1547.71	3.76429	2	0
										AQGMFGVPR	0.000762	961.48	961.484	4.07289	2	0
										GQYYSLPQLGK	0.000765	1252.65	1252.65	6.17892	2	0
										VDEIPFVVAR	0.000809	1143.63	1143.63	4.97189	2	0
										AQGMFGVPR	0.000964	961.48	961.484	3.75567	2	0
										FVEFFGEGTASLTTPDR	0.000969	1872.89	1872.9	5.91546	3	0
										ANFLASPPLVVAYAIAGNVTR	0.000983	2143.18	2143.19	5.21235	3	0
										ANFLASPPLVVAYAIAGNVTR	0.000998	2144.19	2144.19	3.2292	2	0
										ATIGNMAPEYGATMGFFPVDEK	0.00113	2345.07	2345.09	9.40824	2	0
										ATIGNMAPEYGATMGFFPVDEK	0.00117	2377.06	2377.07	4.04113	3	0	ATIGNM[147]APEYGATM[147]GFFPVDEK
										GQVYDWPK	0.00119	991.476	991.48	3.65415	2	0
										VDEIPFVVAR	0.00119	1143.63	1143.63	2.62323	2	0
										STYIAEPPFFQDFALEPSGEAVTVR	0.00137	2770.35	2770.37	7.42722	3	0
										LGFGVTAYGCTTCIGNAGDLTQALNDTIVQNDIVAAAVLSGNR	0.00166	4413.18	4413.18	-0.767247	4	0	LGFGVTAYGC[160]TTC[160]IGNAGDLTQALNDTIVQNDIVAAAVLSGNR
										AQGMFGVPR	0.00166	977.475	977.48	4.47889	2	0	AQGM[147]FGVPR
										TDEEIAAFEGYFR	0.0018	1546.69	1546.7	4.89431	3	0
										ATIGNMAPEYGATMGFFPVDEK	0.00204	2378.07	2378.07	1.27246	3	0	ATIGNM[147]APEYGATM[147]GFFPVDEK
										VVLESVLR	0.00207	913.56	913.564	4.4748	2	0
										EGVTATDLVLTITEMLR	0.00209	1876.98	1876.98	1.4177	2	0	EGVTATDLVLTITEM[147]LR
										SLFAKPVAENGFNK	0.00227	1520.8	1520.8	2.13506	2	0
										AAGLLPYLDK	0.00266	1059.6	1059.6	3.42017	2	0
										GQYYSLPQLGK	0.00275	1252.65	1252.65	0.331299	2	0
										ADFNSYGSR	0.00279	1015.44	1015.44	5.79456	2	0
										SNLVGMGVLPLQFK	0.00286	1501.83	1501.83	-0.28099	2	0
										AQGMFGVPR	0.00314	977.475	977.478	2.79291	2	0	AQGM[147]FGVPR
										AQGMFGVPR	0.00383	977.475	977.479	4.04102	2	0	AQGM[147]FGVPR
										VHNGDVLIAAITSCTNTSNPSVLLAAGLLAK	0.00387	3120.67	3120.62	-15.3127	3	0	VHNGDVLIAAITSC[160]TNTSNPSVLLAAGLLAK
										VVLESVLR	0.00388	913.56	913.564	4.4748	2	0
										VVLESVLR	0.00423	913.56	913.563	3.67354	2	0
										DLMTEPVGK	0.00428	1004.48	1004.49	4.37836	2	0	DLM[147]TEPVGK
										YIAEGTPTVVFGGEEYGTGSSR	0.00503	2276.06	2276.07	5.15145	3	0
										FVEFFGEGTASLTTPDR	0.00557	1872.89	1872.91	9.63752	2	0
										EGVTATDLVLTITEMLR	0.00612	1861.99	1861.99	-0.556393	3	0
										SNLVGMGVLPLQFK	0.00617	1517.83	1517.83	3.16241	2	0	SNLVGM[147]GVLPLQFK
										YIAEGTPTVVFGGEEYGTGSSR	0.00887	2277.07	2277.09	8.24306	2	0
										EGVTATDLVLTITEMLR	0.0103	1876.98	1876.99	3.39428	3	0	EGVTATDLVLTITEM[147]LR
										TLTLDLGTVAPSLAGPK	0.0116	1652.93	1652.94	3.36553	3	0
										YLLSHGVLK	0.0118	1028.6	1028.61	4.18918	2	0
										YLLSHGVLK	0.012	1028.6	1028.61	3.83239	2	0
										ATIGNMAPEYGATMGFFPVDEK	0.0134	2361.07	2361.08	5.57926	3	0	ATIGNM[147]APEYGATMGFFPVDEK
										VEGGITLHQPTGEELSIYDAAMK	0.0135	2474.2	2474.2	0.847143	3	0	VEGGITLHQPTGEELSIYDAAM[147]K
										EKNALDLNMQLEFK	0.0135	1707.85	1707.86	5.98179	3	1	EKNALDLNM[147]QLEFK
										DVADLDREYTNADGVK	0.0136	1779.83	1779.83	3.89026	2	1
										YLLSHGVLK	0.0149	1028.6	1028.61	4.30779	2	0
										NALDLNMQLEFK	0.0154	1434.72	1434.72	2.15931	2	0
										SLFAKPVAENGFNK	0.0166	1520.8	1520.81	4.45424	3	0
										EKNALDLNMQLEFK	0.0171	1707.85	1707.86	3.73042	3	1	EKNALDLNM[147]QLEFK
										EGVTATDLVLTITEMLR	0.0191	1876.98	1876.99	5.54081	3	0	EGVTATDLVLTITEM[147]LR
										AAGLLPYLDK	0.0195	1059.6	1059.6	4.34222	2	0
										NALDLNMQLEFK	0.0195	1452.73	1452.7	-18.7082	2	0	NALDLNM[147]QLEFK
										GQVYDWPK	0.0206	991.476	991.48	3.59262	2	0
										EKNALDLNMQLEFK	0.0235	1708.86	1708.84	-9.11486	2	1	EKNALDLNM[147]QLEFK
										ALGVFGDSVTTDHISPAGSIK	0.0236	2071.06	2071.07	4.37602	3	0
										VHNGDVLIAAITSCTNTSNPSVLLAAGLLAK	0.024	3121.68	3121.66	-8.14786	3	0	VHNGDVLIAAITSC[160]TNTSNPSVLLAAGLLAK
										YIAEGTPTVVFGGEEYGTGSSR	0.0287	2276.06	2276.07	4.59434	2	0
										VTEEHVR	0.0325	868.44	868.445	5.27267	2	0
										DLMTEPVGK	0.0325	1004.48	1004.49	5.10809	2	0	DLM[147]TEPVGK
										DLMTEPVGK	0.0351	1004.48	1004.49	4.49982	2	0	DLM[147]TEPVGK
										STYIAEPPFFQDFALEPSGEAVTVR	0.0366	2770.35	2770.37	7.74054	2	0
										YLLSHGVLK	0.0378	1028.6	1028.61	4.30779	2	0
										AQGMFGVPR	0.0434	962.488	962.493	5.35072	2	0
										NALDLNMQLEFK	0.0462	1451.72	1451.71	-5.9488	2	0	NALDLNM[147]QLEFK
										SNLVGMGVLPLQFK	0.0471	1518.84	1518.83	-0.769669	2	0	SNLVGM[147]GVLPLQFK
										ALGVFGDSVTTDHISPAGSIK	0.0483	2071.06	2071.04	-9.02678	2	0
	P13645.6	-	Homo sapiens	Keratin, type I cytoskeletal 10	58826.4	5.13429	11	27.0548	297.603	GSLGGGFSSGGFSGGSFSR	2.96e-07	1706.76	1706.77	5.58073	2	0
										SKELTTEIDNNIEQISSYK	2.38e-05	2211.09	2211.11	8.32983	3	1
										QSLEASLAETEGR	3.08e-05	1389.67	1389.68	2.35019	2	0
										ALEESNYELEGK	5.05e-05	1380.64	1380.65	3.14854	2	0
										NQILNLTTDNANILLQIDNAR	0.000384	2366.26	2366.25	-0.977916	3	0
										ELTTEIDNNIEQISSYK	0.000413	1995.96	1995.96	-1.14331	2	0
										ALEESNYELEGK	0.00112	1381.65	1381.64	-8.1533	2	0
										SQYEQLAEQNR	0.00115	1364.63	1364.64	5.90122	2	0
										NVQALEIELQSQLALK	0.00502	1797.01	1797.01	0.239286	3	0
										NVSTGDVNVEMNAAPGVDLTQLLNNMR	0.00511	2872.39	2872.43	11.9559	3	0
										LENEIQTYR	0.00808	1164.58	1164.59	7.11589	2	0
										QSVEADINGLR	0.0113	1200.61	1200.61	3.83972	2	0
										NVSTGDVNVEMNAAPGVDLTQLLNNMR	0.0121	2887.38	2887.4	7.86388	3	0	NVSTGDVNVEMNAAPGVDLTQLLNNM[147]R
										NVSTGDVNVEMNAAPGVDLTQLLNNMR	0.0176	2888.39	2888.4	4.7594	3	0	NVSTGDVNVEM[147]NAAPGVDLTQLLNNMR
										NVQALEIELQSQLALK	0.0284	1796	1796.01	1.02171	2	0
	P35908.2	-	Homo sapiens	Keratin, type II cytoskeletal 2 epidermal	65432.1	8.07353	10	27.23	272.3	SISISVAGGGGGFGAAGGFGGR	3.24e-07	1837.91	1837.92	9.01515	2	0
										NVQDAIADAEQR	1.39e-05	1328.63	1328.64	3.94842	2	0
										GGGFGGGSSFGGGSGFSGGGFGGGGFGGGR	1.74e-05	2399.02	2399.02	1.40808	2	0
										MSGDLSSNVTVSVTSSTISSNVASK	7.4e-05	2474.19	2474.23	14.5243	2	0	M[147]SGDLSSNVTVSVTSSTISSNVASK
										YEELQVTVGR	0.000131	1192.61	1192.61	3.73383	2	0
										GFSSGSAVVSGGSR	0.000196	1253.6	1253.61	6.65523	2	0
										MSGDLSSNVTVSVTSSTISSNVASK	0.000362	2458.2	2458.21	6.68457	2	0
										VDLLNQEIEFLK	0.000579	1459.79	1459.8	3.57106	2	0
										TAAENDFVTLK	0.00163	1207.61	1207.61	2.04288	2	0
										AAFGGSGGRGSSSGGGYSSGSSSYGSGGR	0.0154	2502.08	2502.06	-5.03062	3	1
										DVDNAYMIK	0.017	1083.49	1083.49	3.53856	2	0	DVDNAYM[147]IK
	P04264.6	-	Homo sapiens	Keratin, type II cytoskeletal 1	66037.9	8.15059	8	14.9068	119.255	NMQDMVEDYR	1.95e-05	1299.52	1299.53	5.77828	2	0
										QISNLQQSISDAEQR	2.83e-05	1716.85	1716.86	2.99618	2	0
										YEELQITAGR	5.5e-05	1178.59	1178.6	6.80303	2	0
										SGGGFSSGSAGIINYQR	0.000183	1656.79	1656.79	4.0645	2	0
										LNDLEDALQQAK	0.000356	1356.69	1356.7	5.80531	2	0
										YEELQITAGR	0.00072	1178.59	1178.6	2.34941	2	0
										SLDLDSIIAEVK	0.00138	1301.71	1301.71	3.19734	2	0
										DYQELMNTK	0.00159	1140.51	1140.52	3.36691	2	0
										TNAENEFVTIK	0.00215	1264.63	1264.64	4.4772	2	0
	P00761.1	-	Sus Scrofa	Trypsin	24409.2	6.99753	4	25.1082	100.433	LGEHNIDVLEGNEQFINAAK	1.21e-06	2210.1	2210.11	5.75088	2	0
										LGEHNIDVLEGNEQFINAAK	2.27e-05	2211.1	2211.09	-7.16474	2	0
										LGEHNIDVLEGNEQFINAAK	3.7e-05	2210.1	2210.11	5.19253	3	0
										LGEHNIDVLEGNEQFINAAK	6.14e-05	2210.1	2210.11	3.8668	3	0
										LGEHNIDVLEGNEQFINAAK	0.000154	2210.1	2210.11	6.18661	3	0
										LGEHNIDVLEGNEQFINAAK	0.000159	2210.1	2210.1	1.62979	3	0
										LGEHNIDVLEGNEQFINAAK	0.00033	2210.1	2210.1	2.62387	3	0
										LGEHNIDVLEGNEQFINAAK	0.000942	2210.1	2210.08	-5.40655	2	0
										VATVSLPR	0.017	841.502	841.505	3.93938	2	0
										IITHPNFNGNTLDNDIMLIK	0.0178	2299.18	2299.17	-1.32004	3	0	IITHPNFNGNTLDNDIM[147]LIK
										VATVSLPR	0.0243	841.502	841.507	6.04277	2	0
										IITHPNFNGNTLDNDIMLIK	0.0264	2283.18	2283.18	1.35557	3	0
										LSSPATLNSR	0.0366	1044.56	1044.56	4.67184	2	0
	P35527.3	-	Homo sapiens	Keratin, type I cytoskeletal 9	62063.6	5.13619	5	18.9406	94.703	EIETYHNLLEGGQEDFESSGAGK	4.03e-07	2509.12	2509.14	4.41907	3	0
										GGSGGSHGGGSGFGGESGGSYGGGEEASGSGGGYGGGSGK	3.99e-06	3222.27	3222.3	6.63444	3	0
										VQALEEANNDLENK	0.000126	1586.77	1586.77	0.556478	2	0
										TLLDIDNTR	0.000626	1059.56	1059.56	4.92187	2	0
										GGGGSFGYSYGGGSGGGFSASSLGGGFGGGSR	0.00123	2705.16	2705.16	0.701991	3	0
										GGGGSFGYSYGGGSGGGFSASSLGGGFGGGSR	0.00917	2705.16	2705.17	2.10597	2	0
	YP_145585.1	pMOL30_055	Cupriavidus metallidurans CH34	putative cytochrome C (plasmid)	78242	8.93029	4	5.63187	22.5275	LDDGEIADIVNFTR	1.03e-05	1578.79	1578.78	-6.71907	2	0
										YTFEQFDR	0.00189	1105.5	1105.5	0.912713	2	0
										TYTAAAFVK	0.0161	970.512	970.52	7.65266	2	0
										TIVPNVENGR	0.0252	1097.58	1097.58	1.72197	2	0
	P13647.3	-	Homo sapiens	Keratin, type II cytoskeletal 5	62377.6	7.58353	3	5.9322	17.7966	LAELEEALQK	0.0107	1142.62	1142.63	7.22551	2	0
										ISISTSGGSFR	0.0298	1110.57	1110.57	6.31299	2	0
										SFSTASAITPSVSR	0.0343	1409.72	1409.72	4.50517	2	0
	P02533.4	-	Homo sapiens	Keratin, type I cytoskeletal 14	51560.9	5.08769	2	7.62712	15.2542	APSTYGGGLSVSSSR	0.00449	1424.69	1424.7	4.78209	2	0
										GQVGGDVNVEMDAAPGVDLSR	0.0279	2100.97	2100.98	4.70686	2	0	GQVGGDVNVEM[147]DAAPGVDLSR
256	ABF06889.1	Rmet_0003	Cupriavidus metallidurans CH34	DNA gyrase, subunit B	93226.7	5.77592	29	48.038	1393.1	AIADGVALDLDNAAAAEASAVALK	3.4e-09	2239.17	2239.18	4.66021	2	0
										TLLGAAVNDDGTADVYAQFDEK	2.17e-07	2312.08	2312.09	5.62697	2	0
										VIETVTGPDGQPVEVSPMK	8.88e-07	1982	1982.01	4.36326	2	0
										VIETVTGPDGQPVEVSPMK	9.68e-07	1998	1998.01	3.82633	2	0	VIETVTGPDGQPVEVSPM[147]K
										TLLGAAVNDDGTADVYAQFDEK	2.1e-06	2312.08	2312.09	4.486	3	0
										LADCQEKDPAMSELFLVEGDSAGGSAK	3.9e-06	2840.28	2840.31	7.85027	3	1	LADC[160]QEKDPAM[147]SELFLVEGDSAGGSAK
										VQIEDAIAADQIFTTLMGDEVEPR	6.36e-06	2677.3	2677.31	3.51548	3	0	VQIEDAIAADQIFTTLM[147]GDEVEPR
										LADCQEKDPAMSELFLVEGDSAGGSAK	9.83e-06	2824.29	2824.32	9.2225	3	1	LADC[160]QEKDPAMSELFLVEGDSAGGSAK
										SAAEIAMTELHAGGK	9.86e-06	1484.73	1484.74	4.12129	2	0
										DGQVNLIEFAK	2.01e-05	1232.64	1232.65	5.05744	2	0
										TLLGAAVNDDGTADVYAQFDEK	2.61e-05	2314.1	2314.08	-5.6562	2	0
										VSGGLHGVGVSCVNALSK	3.42e-05	1739.9	1739.9	3.32433	2	0	VSGGLHGVGVSC[160]VNALSK
										AIADGVALDLDNAAAAEASAVALK	3.74e-05	2239.17	2239.18	5.49936	3	0
										VIETVTGPDGQPVEVSPMK	3.81e-05	1998	1998.01	6.08659	2	0	VIETVTGPDGQPVEVSPM[147]K
										AATTFQGLIPDGTK	5.43e-05	1418.74	1418.75	4.49483	2	0
										LADCQEKDPAMSELFLVEGDSAGGSAK	6.21e-05	2840.28	2840.29	3.59541	3	1	LADC[160]QEKDPAM[147]SELFLVEGDSAGGSAK
										SAAEIAMTELHAGGK	6.81e-05	1500.72	1500.73	6.33694	2	0	SAAEIAM[147]TELHAGGK
										IIIMTDADVDGSHIR	6.88e-05	1670.83	1670.84	4.4427	3	0	IIIM[147]TDADVDGSHIR
										VQIEDAIAADQIFTTLMGDEVEPR	8.34e-05	2678.31	2678.33	6.85096	2	0	VQIEDAIAADQIFTTLM[147]GDEVEPR
										VIETVTGPDGQPVEVSPMK	9.57e-05	1998	1998.01	5.53704	2	0	VIETVTGPDGQPVEVSPM[147]K
										GLGEMNPEQLFETTLDVTQR	9.91e-05	2294.1	2294.11	3.87298	2	0	GLGEM[147]NPEQLFETTLDVTQR
										MLSSQEVLTLITALGTGIGK	0.000112	2048.13	2048.13	1.392	2	0	M[147]LSSQEVLTLITALGTGIGK
										VSGGLHGVGVSCVNALSK	0.00017	1739.9	1739.9	3.49158	3	0	VSGGLHGVGVSC[160]VNALSK
										RNFIESNALVAR	0.000194	1388.75	1388.76	4.38451	3	1
										TGKEEDFAFSGGVK	0.000422	1470.7	1470.7	3.64928	2	1
										TTLHPNIFYANAEK	0.00051	1617.82	1617.82	4.5512	3	0
										GLGEMNPEQLFETTLDVTQR	0.000663	2293.09	2293.09	0.802411	3	0	GLGEM[147]NPEQLFETTLDVTQR
										QYQLAEGVIGR	0.000808	1232.65	1232.66	4.8562	2	0
										GFVEYINR	0.00133	996.503	996.507	4.37129	2	0
										AKVETSGDDMREGLACVLSVK	0.00237	2280.11	2280.12	3.34633	3	2	AKVETSGDDM[147]REGLAC[160]VLSVK
										YKGLGEMNPEQLFETTLDVTQR	0.00246	2586.26	2586.27	2.03189	3	1	YKGLGEM[147]NPEQLFETTLDVTQR
										TLLGAAVNDDGTADVYAQFDEK	0.00426	2313.09	2313.1	3.61854	3	0
										SAAEIAMTELHAGGK	0.00429	1500.72	1500.73	4.94561	3	0	SAAEIAM[147]TELHAGGK
										ASLSRPDGSEINGEALTELAR	0.00464	2185.1	2185.11	5.37139	2	0
										TTLHPNIFYANAEK	0.00738	1617.82	1617.82	3.20123	2	0
										GFVEYINR	0.00819	996.503	996.51	6.82085	2	0
										LPVEELVGK	0.00865	982.57	982.573	3.62519	2	0
										TLLLTFFYR	0.00867	1173.67	1173.67	-1.63931	2	0
										GFVEYINR	0.00876	996.503	996.507	4.4325	2	0
										YIKDDNELNAYMLK	0.01	1744.83	1744.84	5.54379	2	1	YIKDDNELNAYM[147]LK
										DGQVNLIEFAK	0.0111	1233.65	1233.63	-13.0451	2	0
										AKVETSGDDMREGLACVLSVK	0.0113	2280.11	2280.12	4.0099	4	2	AKVETSGDDM[147]REGLAC[160]VLSVK
										GYVYIAQPPLYK	0.0125	1410.75	1410.76	3.81711	3	0
										TGKEEDFAFSGGVK	0.0137	1470.7	1470.7	1.73115	3	1
										IIIMTDADVDGSHIR	0.0154	1654.83	1654.84	2.99003	3	0
										YIKDDNELNAYMLK	0.0164	1744.83	1744.84	2.9126	3	1	YIKDDNELNAYM[147]LK
										YIKDDNELNAYMLK	0.0196	1728.84	1728.85	3.41385	3	1
										YIKDDNELNAYMLK	0.0217	1744.83	1744.84	2.07298	3	1	YIKDDNELNAYM[147]LK
										NFIESNALVAR	0.0232	1232.65	1232.66	3.86565	2	0
										VETSGDDMREGLACVLSVK	0.0249	2080.98	2080.99	4.86791	3	1	VETSGDDM[147]REGLAC[160]VLSVK
										IVDVDALR	0.0265	899.508	899.511	3.97106	2	0
										GYVYIAQPPLYK	0.0294	1411.76	1411.76	-4.40372	2	0
										LSHVDADFVHGADYAALAR	0.0304	2025.98	2025.96	-7.86089	3	0
										TTLHPNIFYANAEK	0.0348	1617.82	1617.82	4.21185	3	0
										RDGQVNLIEFAK	0.0433	1389.75	1389.75	4.20436	2	1
										AIADGVALDLDNAAAAEASAVALK	0.0496	2240.18	2240.16	-9.61888	3	0
	ABF09369.1	Rmet_2492	Cupriavidus metallidurans CH34	aconitate hydratase 1	97943.8	6.58351	26	44.0622	1145.62	YIAEGTPTVVFGGEEYGTGSSR	7e-09	2276.06	2276.07	5.55961	2	0
										VEGGITLHQPTGEELSIYDAAMK	8.08e-09	2474.2	2474.21	4.17711	3	0	VEGGITLHQPTGEELSIYDAAM[147]K
										TDEEIAAFEGYFR	3.83e-07	1546.69	1546.7	4.15337	2	0
										YIAEGTPTVVFGGEEYGTGSSR	9.29e-07	2276.06	2276.07	4.37994	2	0
										FVEFFGEGTASLTTPDR	9.91e-07	1872.89	1872.9	4.74935	2	0
										ATIGNMAPEYGATMGFFPVDEK	1.66e-06	2378.07	2378.09	7.51492	2	0	ATIGNM[147]APEYGATM[147]GFFPVDEK
										SNLVGMGVLPLQFK	4.61e-06	1517.83	1517.83	4.60988	2	0	SNLVGM[147]GVLPLQFK
										FVEFFGEGTASLTTPDR	6.31e-06	1872.89	1872.9	7.61711	2	0
										VHNGDVLIAAITSCTNTSNPSVLLAAGLLAK	8.26e-06	3120.67	3120.63	-12.3791	3	0	VHNGDVLIAAITSC[160]TNTSNPSVLLAAGLLAK
										EGVTATDLVLTITEMLR	9.51e-06	1877.99	1878	5.25882	2	0	EGVTATDLVLTITEM[147]LR
										VVLQDFTGVPLLADLAAMR	1.35e-05	2044.1	2044.11	4.93273	2	0	VVLQDFTGVPLLADLAAM[147]R
										YIAEGTPTVVFGGEEYGTGSSR	1.79e-05	2276.06	2276.07	5.3452	2	0
										ATIGNMAPEYGATMGFFPVDEK	2.51e-05	2361.07	2361.07	1.26765	2	0	ATIGNMAPEYGATM[147]GFFPVDEK
										SNLVGMGVLPLQFK	2.96e-05	1517.83	1517.83	3.16241	2	0	SNLVGM[147]GVLPLQFK
										DVADLDREYTNADGVK	4.13e-05	1779.83	1779.83	3.43685	3	1
										SNLVGMGVLPLQFK	4.81e-05	1501.83	1501.84	3.29531	2	0
										ATIGNMAPEYGATMGFFPVDEK	5.6e-05	2377.06	2377.07	3.5018	3	0	ATIGNM[147]APEYGATM[147]GFFPVDEK
										ATIGNMAPEYGATMGFFPVDEK	6.35e-05	2378.07	2378.07	2.35065	3	0	ATIGNM[147]APEYGATM[147]GFFPVDEK
										ALGVFGDSVTTDHISPAGSIK	6.88e-05	2071.06	2071.07	5.11912	2	0
										NALDLNMQLEFK	9.13e-05	1450.71	1450.72	3.54722	2	0	NALDLNM[147]QLEFK
										ANFLASPPLVVAYAIAGNVTR	0.000129	2143.18	2143.18	1.28827	2	0
										ATIGNMAPEYGATMGFFPVDEK	0.000133	2377.06	2377.07	4.43152	2	0	ATIGNM[147]APEYGATM[147]GFFPVDEK
										NALDLNMQLEFKR	0.000156	1606.81	1606.82	3.78762	2	1	NALDLNM[147]QLEFKR
										GQYYSLPQLGK	0.00018	1253.65	1253.64	-11.9275	2	0
										EGVTATDLVLTITEMLR	0.000244	1877.99	1877.99	2.81418	3	0	EGVTATDLVLTITEM[147]LR
										VHNGDVLIAAITSCTNTSNPSVLLAAGLLAK	0.000246	3119.66	3119.67	1.9345	3	0	VHNGDVLIAAITSC[160]TNTSNPSVLLAAGLLAK
										FVEFFGEGTASLTTPDR	0.000267	1873.9	1873.9	-0.849033	2	0
										ALGVFGDSVTTDHISPAGSIK	0.000281	2071.06	2071.07	4.1993	3	0
										VDEIPFVVAR	0.000447	1143.63	1143.63	4.22427	2	0
										EGVTATDLVLTITEMLR	0.000463	1861.99	1862	3.87595	2	0
										VDEIPFVVAR	0.000596	1143.63	1143.63	3.26417	2	0
										VVLQDFTGVPLLADLAAMR	0.00106	2044.1	2044.09	-3.8819	3	0	VVLQDFTGVPLLADLAAM[147]R
										SNLVGMGVLPLQFK	0.00221	1517.83	1517.83	2.59911	2	0	SNLVGM[147]GVLPLQFK
										AQGMFGVPR	0.00266	961.48	961.485	4.45459	2	0
										VVLESVLR	0.00393	913.56	913.563	3.54	2	0
										TLTLDLGTVAPSLAGPK	0.00399	1652.93	1652.94	4.9161	3	0
										TDEEIAAFEGYFR	0.00406	1546.69	1546.71	7.49922	3	0
										DVADLDREYTNADGVK	0.0047	1779.83	1779.84	6.63379	2	1
										YIAEGTPTVVFGGEEYGTGSSR	0.00525	2276.06	2276.07	4.26658	3	0
										AAGLLPYLDK	0.00606	1059.6	1059.6	4.22708	2	0
										YLLSHGVLK	0.00647	1028.6	1028.61	3.95099	2	0
										TLTLDLGTVAPSLAGPK	0.00852	1652.93	1652.94	5.92159	2	0
										GQVYDWPK	0.00942	991.476	991.477	0.760482	2	0
										VDEIPFVVAR	0.0104	1143.63	1143.63	1.55645	2	0
										GNDSVQSLGIVGNETFDVEGIEGDLKPQQDVTLVIHR	0.0108	3979	3979.01	0.852977	4	0
										NALDLNMQLEFK	0.0112	1450.71	1450.72	6.66018	2	0	NALDLNM[147]QLEFK
										ALGVFGDSVTTDHISPAGSIKDTSPAGK	0.0124	2728.38	2728.4	5.75506	3	1
										GTQLLGVK	0.0153	814.491	814.495	4.41134	2	0
										FVEFFGEGTASLTTPDR	0.0175	1872.89	1872.9	4.22769	2	0
										TLTLDLGTVAPSLAGPK	0.0188	1652.93	1652.94	4.88767	2	0
										SLFAKPVAENGFNK	0.0268	1520.8	1520.81	4.45424	3	0
										AQGMFGVPR	0.0321	977.475	977.48	4.97813	2	0	AQGM[147]FGVPR
										YIAEGTPTVVFGGEEYGTGSSR	0.0344	2277.07	2277.08	7.38538	2	0
										VEGGITLHQPTGEELSIYDAAMK	0.0403	2474.2	2474.21	5.58322	3	0	VEGGITLHQPTGEELSIYDAAM[147]K
										VEGGITLHQPTGEELSIYDAAMK	0.0419	2475.21	2475.22	3.88452	3	0	VEGGITLHQPTGEELSIYDAAM[147]K
	ABF08838.1	Rmet_1959	Cupriavidus metallidurans CH34	ATP-dependent Clp protease, ATP-binding subunit ClpB (protein disaggregation chaperone)	95941.5	5.73075	16	25.406	406.497	TQVGAEEIAEVVSR	9.46e-06	1486.76	1486.77	4.8804	2	0
										NNPVLIGEPGVGK	8.42e-05	1292.71	1292.71	3.19871	2	0
										AIQQQIENPVAK	0.000144	1337.73	1337.73	3.01556	2	0
										DLNNLLNATEK	0.000329	1243.64	1243.64	3.34663	2	0
										AIDLIDEAAAR	0.000516	1156.61	1156.61	4.69389	2	0
										DVVPVDYVDGEFTFGR	0.000554	1813.85	1813.86	5.64655	2	0
										GAAQGAAALKEEIEK	0.000924	1484.78	1484.79	4.40468	2	1
										LIGAPPGYVGYDEGGYLTEAVR	0.00197	2297.15	2297.17	10.2218	3	0
										TAIVEGLAQR	0.00201	1056.59	1056.6	3.91731	2	0
										YTVDLTER	0.00295	995.492	995.497	4.19893	2	0
										SLEAAITAVR	0.00501	1029.58	1029.59	3.58009	2	0
										IVNGEVPETLK	0.00549	1197.66	1197.67	4.1723	2	0
										LIGAPPGYVGYDEGGYLTEAVR	0.00551	2297.15	2297.16	5.73756	2	0
										TQVGAEEIAEVVSR	0.00694	1486.76	1486.77	3.43431	3	0
										IDEVVVFHALDQK	0.0133	1512.81	1512.81	5.68414	2	0
										LELIEQEIIR	0.0286	1254.72	1254.72	3.40873	2	0
										VLVDEPSVEATIAILR	0.0371	1723.97	1723.98	5.8168	2	0
										NTVIVMTSNLGSHIIQSMAGEPQEAVK	0.0419	2886.43	2886.45	5.72298	3	0	NTVIVM[147]TSNLGSHIIQSM[147]AGEPQEAVK
	P35908.2	-	Homo sapiens	Keratin, type II cytoskeletal 2 epidermal	65432.1	8.07353	10	30.2034	302.034	GGGFGGGSSFGGGSGFSGGGFGGGGFGGGR	7.36e-08	2398.01	2398.02	3.43993	2	0
										SISISVAGGGGGFGAAGGFGGR	2.4e-06	1837.91	1837.92	6.29248	2	0
										NVQDAIADAEQR	7.25e-06	1328.63	1328.64	2.93761	2	0
										VLYDAEISQIHQSVTDTNVILSMDNSR	8.54e-06	3064.49	3064.51	7.77617	3	0	VLYDAEISQIHQSVTDTNVILSM[147]DNSR
										MSGDLSSNVTVSVTSSTISSNVASK	9.01e-06	2473.19	2473.2	4.25888	2	0	M[147]SGDLSSNVTVSVTSSTISSNVASK
										TSQNSELNNMQDLVEDYK	2.73e-05	2142.94	2142.95	5.49993	2	0	TSQNSELNNM[147]QDLVEDYK
										YEELQVTVGR	7.52e-05	1192.61	1192.61	3.4261	2	0
										GGGFGGGSSFGGGSGFSGGGFGGGGFGGGR	0.00446	2398.01	2398.02	3.25603	3	0
										TAAENDFVTLK	0.0158	1207.61	1207.61	5.2782	2	0
										AAFGGSGGRGSSSGGGYSSGSSSYGSGGR	0.03	2501.07	2501.06	-3.35377	3	1
										DVDNAYMIK	0.0313	1083.49	1083.49	3.98988	2	0	DVDNAYM[147]IK
	P35527.3	-	Homo sapiens	Keratin, type I cytoskeletal 9	62063.6	5.13619	9	31.4607	283.146	VQALEEANNDLENK	1.19e-06	1585.76	1585.76	4.09016	2	0
										GGGGSFGYSYGGGSGGGFSASSLGGGFGGGSR	3.96e-06	2706.17	2706.17	1.9293	2	0
										DQIVDLTVGNNK	0.000126	1314.68	1314.68	3.71954	2	0
										NYSPYYNTIDDLK	0.00162	1604.74	1604.74	5.07186	2	0
										TLLDIDNTR	0.00296	1059.56	1059.56	5.03702	2	0
										DIENQYETQITQIEHEVSSSGQEVQSSAK	0.00326	3264.51	3264.55	11.977	3	0
										GGGGSFGYSYGGGSGGGFSASSLGGGFGGGSR	0.00841	2704.15	2704.17	6.7241	3	0
										GGSGGSHGGGSGFGGESGGSYGGGEEASGSGGGYGGGSGK	0.0186	3223.28	3223.3	5.15934	3	0
										EEMSQLTGQNSGDVNVEINVAPGK	0.0225	2532.19	2532.2	5.13785	2	0	EEM[147]SQLTGQNSGDVNVEINVAPGK
										EIETYHNLLEGGQEDFESSGAGK	0.0349	2511.14	2511.15	4.13398	3	0
	P04264.6	-	Homo sapiens	Keratin, type II cytoskeletal 1	66037.9	8.15059	12	23.1366	277.64	QISNLQQSISDAEQR	3.38e-07	1715.84	1715.85	5.12518	2	0
										LNDLEDALQQAK	9.23e-06	1356.69	1356.69	4.36504	2	0
										NKLNDLEDALQQAK	2.81e-05	1598.83	1598.83	2.84834	3	1
										LALDLEIATYR	4.72e-05	1276.7	1276.71	2.89104	2	0
										SLDLDSIIAEVK	0.00012	1301.71	1301.71	4.60395	2	0
										TNAENEFVTIK	0.000372	1264.63	1264.64	5.34544	2	0
										NMQDMVEDYR	0.00107	1315.52	1315.53	6.98661	2	0	NMQDM[147]VEDYR
										YEELQITAGR	0.00173	1178.59	1178.6	4.10998	2	0
										GGGGGGYGSGGSSYGSGGGSYGSGGGGGGGR	0.00227	2383.95	2383.96	1.38048	2	0
										QISNLQQSISDAEQR	0.00269	1715.84	1715.85	3.80105	3	0
										SLDLDSIIAEVK	0.00785	1302.72	1302.72	2.0795	2	0
										SGGGFSSGSAGIINYQR	0.0124	1656.79	1656.79	3.91722	2	0
										SLVNLGGSKSISISVAR	0.015	1687.97	1687.98	7.42963	3	1
										TNAENEFVTIKK	0.0306	1392.72	1392.73	4.45529	3	1
	P13645.6	-	Homo sapiens	Keratin, type I cytoskeletal 10	58826.4	5.13429	10	24.6575	246.575	GSLGGGFSSGGFSGGSFSR	3.77e-08	1706.76	1706.77	4.22202	2	0
										NVSTGDVNVEMNAAPGVDLTQLLNNMR	3.48e-07	2903.38	2903.39	3.69122	3	0	NVSTGDVNVEM[147]NAAPGVDLTQLLNNM[147]R
										ALEESNYELEGK	1.95e-05	1380.64	1380.65	4.03291	2	0
										VLDELTLTK	0.000168	1030.59	1030.59	3.32722	2	0
										NQILNLTTDNANILLQIDNAR	0.000848	2367.26	2367.26	-1.51356	3	0
										ALEESNYELEGK	0.003	1380.64	1380.65	8.09986	2	0
										IRLENEIQTYR	0.00414	1433.76	1433.77	2.71872	2	1
										NVQALEIELQSQLALK	0.00553	1796	1796.01	3.26447	2	0
										ELTTEIDNNIEQISSYK	0.00688	1996.97	1996.95	-8.83838	2	0
										NVSTGDVNVEMNAAPGVDLTQLLNNMR	0.0172	2904.38	2904.4	5.14395	3	0	NVSTGDVNVEM[147]NAAPGVDLTQLLNNM[147]R
										LKYENEVALR	0.0353	1233.67	1233.68	5.96674	3	1
										SKELTTEIDNNIEQISSYK	0.0381	2211.09	2211.1	4.60316	3	1
	ABF10441.1	Rmet_3569	Cupriavidus metallidurans CH34	DNA topoisomerase III	98617.4	8.73432	8	10.2132	81.7059	FACTACEFSISK	2.32e-05	1419.62	1419.62	0.969276	2	0	FAC[160]TAC[160]EFSISK
										NTLGLAQALYEK	3.7e-05	1319.71	1319.71	3.29467	2	0
										AEFIAAAGLYEGR	0.0001	1367.7	1367.7	1.23565	2	0
										YNEATLLSAMEGAGK	0.000504	1569.73	1569.74	1.56268	2	0	YNEATLLSAM[147]EGAGK
										GGGFFLTTVGR	0.00503	1110.58	1110.59	3.12719	2	0
										IILQQEISR	0.0132	1098.64	1098.64	4.25526	2	0
										LYDLVVR	0.019	876.507	876.512	5.25495	2	0
										VQTPTLSIVVER	0.0337	1340.77	1340.78	7.53077	2	0
	YP_145585.1	pMOL30_055	Cupriavidus metallidurans CH34	putative cytochrome C (plasmid)	78242	8.93029	6	11.9505	71.7033	TPFGTLYSTNITPDAATGIGR	3.48e-07	2152.08	2152.09	5.95749	2	0
										YFLAGETVEGWR	1.98e-05	1426.69	1426.69	3.91396	2	0
										LDDGEIADIVNFTR	2.55e-05	1577.78	1577.78	0.773238	2	0
										LDDGEIADIVNFTR	0.0136	1577.78	1577.78	-0.086197	3	0
										TYTAAAFVK	0.0173	970.512	970.517	4.38222	2	0
										HGIVSGNMVDVVQHSTQYMR	0.0286	2290.07	2290.07	-1.53882	3	0	HGIVSGNM[147]VDVVQHSTQYM[147]R
										LNIDTHNLLPK	0.0424	1276.71	1276.72	6.04442	2	0
	P00761.1	-	Sus Scrofa	Trypsin	24409.2	6.99753	3	20.7792	62.3377	LGEHNIDVLEGNEQFINAAK	4.97e-08	2210.1	2210.11	6.43501	3	0
										LGEHNIDVLEGNEQFINAAK	1.91e-07	2210.1	2210.11	3.87268	2	0
										IITHPNFNGNTLDNDIMLIK	2.62e-06	2298.17	2298.18	4.56973	3	0	IITHPNFNGNTLDNDIM[147]LIK
										LGEHNIDVLEGNEQFINAAK	3.4e-06	2210.1	2210.11	4.61247	3	0
										LGEHNIDVLEGNEQFINAAK	5.13e-05	2209.09	2209.09	-1.65679	2	0
										LGEHNIDVLEGNEQFINAAK	8.89e-05	2211.1	2211.11	3.70494	3	0
										LGEHNIDVLEGNEQFINAAK	0.00024	2210.1	2210.11	4.77807	3	0
										LGEHNIDVLEGNEQFINAAK	0.00026	2210.1	2210.11	4.61247	3	0
										LGEHNIDVLEGNEQFINAAK	0.000902	2210.1	2210.11	6.76667	3	0
										IITHPNFNGNTLDNDIMLIK	0.00306	2299.18	2299.18	1.07473	2	0	IITHPNFNGNTLDNDIM[147]LIK
										VATVSLPR	0.00847	841.502	841.506	4.30183	2	0
										IITHPNFNGNTLDNDIMLIK	0.0141	2282.17	2282.19	6.32511	3	0
										LGEHNIDVLEGNEQFINAAK	0.0202	2210.1	2210.11	8.00915	3	0
										LGEHNIDVLEGNEQFINAAK	0.0203	2210.1	2210.1	2.04425	3	0
										LGEHNIDVLEGNEQFINAAK	0.0207	2211.1	2211.12	7.29952	2	0
										VATVSLPR	0.0224	841.502	841.507	5.53415	2	0
										VATVSLPR	0.0425	841.502	841.506	4.22934	2	0
	ABF11129.1	Rmet_4263	Cupriavidus metallidurans CH34	2-oxoacid dehydrogenase subunit E1 (plasmid)	99690.2	5.73196	6	8.29596	49.7758	MMACVDGDYQTFK	8.99e-05	1596.63	1596.63	2.14452	2	0	M[147]M[147]AC[160]VDGDYQTFK
										AYTVLGTDGYGR	0.000445	1271.61	1271.62	2.57704	2	0
										TGPELPVPPLSAFDGQLK	0.00123	1864.99	1864.99	0.34799	2	0
										GFLLGGTAGR	0.0116	947.519	947.522	2.92976	2	0
										ALVDEGTLER	0.0203	1101.57	1101.57	5.33785	2	0
										VQLLGAGTIFR	0.049	1173.69	1173.69	4.25752	2	0
	P13647.3	-	Homo sapiens	Keratin, type II cytoskeletal 5	62377.6	7.58353	4	10.1695	40.678	VDALMDEINFMK	0.00147	1456.66	1456.66	3.71261	2	0	VDALM[147]DEINFM[147]K
										LAELEEALQK	0.00296	1142.62	1142.62	4.76887	2	0
										MFFDAELSQMQTHVSDTSVVLSMDNNR	0.0058	3150.38	3150.4	6.038	3	0	M[147]FFDAELSQM[147]QTHVSDTSVVLSM[147]DNNR
										TTAENEFVMLK	0.0422	1297.62	1297.63	2.18014	2	0	TTAENEFVM[147]LK
	ABF07566.1	Rmet_0680	Cupriavidus metallidurans CH34	Glutamine-dependent NAD(+) synthetase (NAD(+) synthase (glutamine-hydrolyzing))	78764.8	6.20624	3	6.84358	20.5307	GEPVYDVTFENVQAGER	1.54e-05	1908.89	1908.89	3.4418	2	0
										SNILAYTMPGFATSDR	1.91e-05	1758.82	1758.82	-2.35441	2	0	SNILAYTM[147]PGFATSDR
										VADPAFNAEQTILLAR	0.00922	1727.92	1727.93	5.2242	2	0
	ABF10601.1	Rmet_3729	Cupriavidus metallidurans CH34	isocitrate dehydrogenase, NADP-dependent (plasmid)	82168.5	5.97151	3	6.69344	20.0803	TFAGPAGVNVVTSDISVAGR	4.73e-06	1917	1917.01	8.27232	2	0
										VALLDGEVIDSMFMSK	0.000129	1785.85	1785.86	4.73555	2	0	VALLDGEVIDSM[147]FM[147]SK
										ALLDFYEDQMEDAR	0.000806	1731.75	1731.75	-0.233867	2	0	ALLDFYEDQM[147]EDAR
	ABF10106.1	Rmet_3234	Cupriavidus metallidurans CH34	outer membrane protein (porin)	41949.2	8.9723	2	9.47631	18.9526	QAFVGMQSQFGTLTLGR	0.0028	1856.93	1856.93	-2.7707	2	0	QAFVGM[147]QSQFGTLTLGR
										GVFVLESGFNVDTGTSGQNNR	0.00395	2197.04	2197.05	6.07363	2	0
	ABF08082.1	Rmet_1196	Cupriavidus metallidurans CH34	pyruvate decarboxylase, E1 component of the pyruvate dehydrogenase complex	100668	5.82076	3	5.58659	16.7598	MMECVDGEYQTFK	0.000154	1669.65	1669.66	2.78261	2	0	M[147]M[147]EC[160]VDGEYQTFK
										YNLDPNKPNPMSV	0.00145	1503.7	1503.71	5.09343	2	0	YNLDPNKPNPM[147]SV
										APSEQSGGDLVFVQGHSAPGVYSR	0.00789	2444.17	2444.18	4.45672	3	0
	P02533.4	-	Homo sapiens	Keratin, type I cytoskeletal 14	51560.9	5.08769	2	7.62712	15.2542	APSTYGGGLSVSSSR	9.75e-05	1424.69	1424.7	4.86773	2	0
										GQVGGDVNVEMDAAPGVDLSR	0.00482	2100.97	2100.99	6.68214	2	0	GQVGGDVNVEM[147]DAAPGVDLSR
	ABF07073.1	Rmet_0187	Cupriavidus metallidurans CH34	L-glutamine:D-fructose-6-phosphate aminotransferase	66257.5	5.80764	2	4.90196	9.80392	IIYLEEGDVVEISR	0.00694	1634.86	1634.87	5.08116	2	0
										GYLTDAQEAEALTNLR	0.014	1763.87	1763.88	5.39723	2	0
	ABF07253.1	Rmet_0367	Cupriavidus metallidurans CH34	Putative Fe-S oxidoreductase FAD/FMN-containing dehydrogenase oxidoreductase protein	147684	8.31502	3	3.24773	9.7432	VATIFSGAGVVTR	0.00299	1276.71	1276.72	5.47108	2	0
										MVLIGDIVGDDEDAVAR	0.00466	1802.87	1802.88	7.05763	2	0	M[147]VLIGDIVGDDEDAVAR
										SGEGFIAVSPEAR	0.0389	1318.65	1318.66	4.9816	2	0
	ABF09009.1	Rmet_2130	Cupriavidus metallidurans CH34	ribonucleotide reductase, coenzyme B12-dependent	90457.2	5.6622	2	4.56731	9.13462	EGGEAAVALASPAEAAPAAK	0.000186	1779.9	1779.9	1.89168	2	0
										GFLDEEGSQVPVVALAAR	0.000287	1857.97	1857.98	3.3585	2	0
	Q7Z794.3	-	Homo sapiens	Keratin, type II cytoskeletal 1b	61900.7	5.73268	2	3.80623	7.61246	FLEQQNQVLQTK	0.000314	1474.78	1474.79	6.82543	2	0
										YQELQITAGR	0.0196	1177.61	1177.61	-0.0280229	2	0
										FLEQQNQVLQTK	0.026	1474.78	1474.79	5.33572	2	0
	ABF09317.1	Rmet_2440	Cupriavidus metallidurans CH34	fused ribonucleaseE: endoribonuclease; RNA-binding protein; RNA degradosome binding protein	112881	5.50259	2	2.31437	4.62874	AFMSVVMPDNMSR	6.74e-06	1531.65	1531.67	17.5791	2	0	AFM[147]SVVM[147]PDNM[147]SR
										DTESSALQVLR	0.00278	1217.63	1217.63	4.84221	2	0
	ABF11414.1	Rmet_4549	Cupriavidus metallidurans CH34	Excinuclease ABC, A subunit (UvrA family protein) (plasmid)	212899	6.32653	2	1.83767	3.67534	GYTAGTFSFNSGDGR	0.00548	1535.66	1535.67	6.96311	2	0
										ELVGADQVDDVVFVDQSPIGK	0.0349	2229.12	2229.13	5.28236	2	0
	Q1LI20.1	Rmet_3334	Cupriavidus metallidurans CH34	DNA-directed RNA polymerase subunit beta	152495	5.57048	2	1.68129	3.36257	GGVVDYVDAMR	0.000352	1196.55	1196.56	5.2852	2	0	GGVVDYVDAM[147]R
										LNEYGFLETPYR	0.00263	1500.72	1500.73	2.23225	2	0
259	ABF08838.1	Rmet_1959	Cupriavidus metallidurans CH34	ATP-dependent Clp protease, ATP-binding subunit ClpB (protein disaggregation chaperone)	95941.5	5.73075	34	51.9722	1767.05	DVVPVDYVDGEFTFGR	7.62e-09	1813.85	1813.86	5.84833	2	0
										LPQVQGTNEVQVGR	9.33e-07	1523.81	1523.81	4.82804	2	0
										LIGAPPGYVGYDEGGYLTEAVR	9.93e-07	2296.14	2296.15	4.56506	2	0
										TQVGAEEIAEVVSR	1.85e-06	1486.76	1486.77	4.96246	2	0
										IDEVVVFHALDQK	8.31e-06	1511.8	1511.8	4.22609	2	0
										NNPVLIGEPGVGK	9.82e-06	1292.71	1292.72	5.27652	2	0
										GELHCIGATTLNEYR	2.52e-05	1732.82	1732.83	8.25187	2	0	GELHC[160]IGATTLNEYR
										TQVGAEEIAEVVSR	2.75e-05	1486.76	1486.76	1.51403	2	0
										DLNNLLNATEK	5.83e-05	1243.64	1243.64	3.34663	2	0
										AGVNVGGLQSALDAAIHR	6.52e-05	1747.93	1747.94	5.8818	2	0
										MDMTLDVSER	0.000103	1211.52	1211.52	3.52616	2	0	M[147]DMTLDVSER
										AIQQQIENPVAK	0.000112	1337.73	1337.74	5.20583	2	0
										VLVLDMAGLLAGAK	0.000283	1385.8	1385.81	7.1735	2	0	VLVLDM[147]AGLLAGAK
										VAELQYGKLPELEGK	0.000341	1672.9	1672.91	5.43546	3	1
										SLEAAITAVR	0.000522	1029.58	1029.59	6.42494	2	0
										MDMTLDVSER	0.000624	1211.52	1211.52	3.52616	2	0	MDM[147]TLDVSER
										EYADLDEIWR	0.000785	1308.6	1308.6	4.27098	2	0
										IVNGEVPETLK	0.000964	1197.66	1197.66	3.56027	2	0
										IVNGEVPETLK	0.00106	1197.66	1197.66	0.502647	2	0
										IDEVVVFHALDQK	0.00108	1511.8	1511.8	4.03559	3	0
										VLVLDMAGLLAGAK	0.00112	1369.8	1369.8	1.21697	2	0
										GAAQGAAALKEEIEK	0.0012	1484.78	1484.79	4.89836	2	1
										AIDLIDEAAAR	0.0014	1156.61	1156.62	5.74957	2	0
										MDMTLDVSER	0.00152	1195.52	1195.53	9.51802	2	0
										IDMSEFMEK	0.00162	1160.47	1160.48	3.31503	2	0	IDM[147]SEFM[147]EK
										TAIVEGLAQR	0.0018	1056.59	1056.6	3.45545	2	0
										VLVDEPSVEATIAILR	0.00186	1723.97	1723.97	0.789456	2	0
										GGDTVNSADAESQR	0.00193	1405.61	1405.62	5.77829	2	0
										LPQVQGTNEVQVGR	0.00216	1524.81	1524.8	-5.65446	2	0
										AGLSDENKPYGSFLFLGPTGVGK	0.00221	2354.2	2354.22	8.29962	2	0
										TQVGAEEIAEVVSR	0.0025	1486.76	1486.77	3.49619	3	0
										RLELIEQEIIR	0.0025	1410.82	1410.83	5.18068	3	1
										AEGAIDAGNMLKPALAR	0.00364	1712.89	1712.89	4.04638	2	0	AEGAIDAGNM[147]LKPALAR
										AEGAIDAGNMLKPALAR	0.00445	1712.89	1712.9	4.78665	3	0	AEGAIDAGNM[147]LKPALAR
										VLVLDMAGLLAGAK	0.00458	1386.8	1386.81	5.06489	2	0	VLVLDM[147]AGLLAGAK
										KPYAVILLDEVEK	0.00565	1515.85	1515.87	9.65396	2	0
										VEITDPAIVAAAELSHR	0.00599	1790.95	1790.96	4.19665	2	0
										AGLSDENKPYGSFLFLGPTGVGK	0.00618	2353.2	2353.21	7.09886	3	0
										VLVLDMAGLLAGAK	0.00733	1386.8	1386.81	2.86414	2	0	VLVLDM[147]AGLLAGAK
										SLEAAITAVR	0.00844	1029.58	1029.59	3.93558	2	0
										YTVDLTER	0.00953	995.492	995.496	4.13765	2	0
										VAELQYGKLPELEGK	0.00971	1672.9	1672.91	5.0786	2	1
										ALLAQDDGAAR	0.0105	1099.56	1099.56	2.4819	2	0
										NDQFIASELFLLAVSDDKGETGR	0.0113	2524.24	2524.26	6.81075	3	1
										DVVPVDYVDGEFTFGR	0.0162	1813.85	1813.86	6.99285	2	0
										MDMTLDVSER	0.0175	1227.51	1227.52	3.7572	2	0	M[147]DM[147]TLDVSER
										TKNNPVLIGEPGVGK	0.0183	1521.85	1521.86	4.69231	3	1
										VEITDPAIVAAAELSHR	0.0256	1790.95	1790.96	3.91635	3	0
										NTVIVMTSNLGSHIIQSMAGEPQEAVK	0.0285	2885.43	2885.43	2.67447	3	0	NTVIVM[147]TSNLGSHIIQSM[147]AGEPQEAVK
										LELIEQEIIR	0.0325	1254.72	1254.72	3.50597	2	0
										LEKEYADLDEIWR	0.0348	1679.83	1679.83	-0.888781	3	1
										MDMTLDVSER	0.0365	1227.51	1227.52	4.75108	2	0	M[147]DM[147]TLDVSER
										DLNNLLNATEK	0.0375	1243.64	1243.65	6.09501	2	0
										RLELIEQEIIR	0.0379	1410.82	1410.82	2.05342	2	1
										GELHCIGATTLNEYR	0.0465	1732.82	1732.83	4.82739	3	0	GELHC[160]IGATTLNEYR
	ABF06889.1	Rmet_0003	Cupriavidus metallidurans CH34	DNA gyrase, subunit B	93226.7	5.77592	16	30.9156	494.649	VIETVTGPDGQPVEVSPMK	1.13e-05	1998	1998	2.78729	2	0	VIETVTGPDGQPVEVSPM[147]K
										VSGGLHGVGVSCVNALSK	1.22e-05	1739.9	1739.91	4.12323	3	0	VSGGLHGVGVSC[160]VNALSK
										ASLSRPDGSEINGEALTELAR	1.75e-05	2185.1	2185.11	5.19794	3	0
										VIETVTGPDGQPVEVSPMK	7.19e-05	1982	1982.01	3.56256	2	0
										DGQVNLIEFAK	9.15e-05	1232.64	1232.65	6.44389	2	0
										GYVYIAQPPLYK	0.000174	1411.76	1411.76	-0.685668	2	0
										GFVEYINR	0.000285	996.503	996.508	5.04464	2	0
										LADCQEKDPAMSELFLVEGDSAGGSAK	0.00115	2824.29	2824.3	4.16565	3	1	LADC[160]QEKDPAMSELFLVEGDSAGGSAK
										AIADGVALDLDNAAAAEASAVALK	0.00366	2240.18	2240.18	1.4972	3	0
										TTLHPNIFYANAEK	0.00377	1617.82	1617.82	2.74012	3	0
										NFIESNALVAR	0.00523	1232.65	1232.66	4.8562	2	0
										GLGEMNPEQLFETTLDVTQR	0.00621	2294.1	2294.1	1.9572	2	0	GLGEM[147]NPEQLFETTLDVTQR
										AATTFQGLIPDGTK	0.00848	1418.74	1418.75	3.80619	2	0
										LADCQEKDPAMSELFLVEGDSAGGSAK	0.0115	2840.28	2840.3	5.20722	3	1	LADC[160]QEKDPAM[147]SELFLVEGDSAGGSAK
										TTLHPNIFYANAEK	0.0173	1617.82	1617.82	2.3711	2	0
										TLLGAAVNDDGTADVYAQFDEK	0.0175	2313.09	2313.09	2.67435	2	0
										SAAEIAMTELHAGGK	0.0222	1500.72	1500.73	5.84918	2	0	SAAEIAM[147]TELHAGGK
										TGKEEDFAFSGGVK	0.0242	1470.7	1470.71	4.34623	3	1
										EGLACVLSVK	0.0367	1074.57	1074.58	4.5283	2	0	EGLAC[160]VLSVK
										TGKEEDFAFSGGVK	0.0498	1470.7	1470.71	5.14313	2	1
	ABF11129.1	Rmet_4263	Cupriavidus metallidurans CH34	2-oxoacid dehydrogenase subunit E1 (plasmid)	99690.2	5.73196	12	15.1345	181.614	GPVIAATDYVR	2.99e-06	1160.62	1160.62	4.22361	2	0
										AYTVLGTDGYGR	0.0001	1271.61	1271.62	3.63318	2	0
										IIQELESEFR	0.000281	1262.65	1262.65	2.17717	2	0
										ALVDEGTLER	0.000852	1101.57	1101.57	2.78966	2	0
										GFLLGGTAGR	0.000902	947.519	947.524	5.31282	2	0
										MMACVDGDYQTFK	0.00168	1596.63	1596.64	7.11375	2	0	M[147]M[147]AC[160]VDGDYQTFK
										WNAIAMVLR	0.00272	1088.58	1088.58	2.56205	2	0	WNAIAM[147]VLR
										FGDLAWAAGDQR	0.00567	1305.61	1305.62	5.6127	2	0
										VETLGQFR	0.011	948.503	948.507	4.20557	2	0
										VQLLGAGTIFR	0.0229	1173.69	1173.69	5.60967	2	0
										EFSTAMSFVR	0.0274	1189.54	1189.55	3.94269	2	0	EFSTAM[147]SFVR
										RTGPELPVPPLSAFDGQLK	0.0406	2022.1	2022.11	5.13179	3	1
	ABF09009.1	Rmet_2130	Cupriavidus metallidurans CH34	ribonucleotide reductase, coenzyme B12-dependent	90457.2	5.6622	8	13.5817	108.654	GFLDEEGSQVPVVALAAR	1.18e-06	1856.96	1856.98	8.28396	2	0
										VFDASCATVESAGAR	1.56e-06	1539.7	1539.71	4.88082	2	0	VFDASC[160]ATVESAGAR
										EGGEAAVALASPAEAAPAAK	1.11e-05	1779.9	1779.91	5.04635	2	0
										GALAPQDISIEVLQEK	0.000678	1709.92	1709.93	6.59797	2	0
										MLEAVQPYIDTSISK	0.000833	1709.85	1709.87	8.64635	2	0	M[147]LEAVQPYIDTSISK
										GFLDEEGSQVPVVALAAR	0.00127	1856.96	1856.97	3.31401	3	0
										DHAYLASVELAEEK	0.00143	1573.76	1573.77	5.43538	3	0
										REGGEAAVALASPAEAAPAAK	0.0017	1936	1936.01	5.08677	3	1
										TVNVPEDYPYEAFR	0.0322	1699.8	1699.79	-1.37958	2	0
	Q1LJ30.1	Rmet_2973	Cupriavidus metallidurans CH34	Leucine--tRNA ligase	96867.5	5.68403	7	10.7675	75.3723	AAIEATAAASEIVAK	1.6e-05	1414.77	1414.77	4.78736	2	0
										TWYNPADVDVQTDER	0.000185	1808.81	1808.81	-1.85039	2	0
										AAVDAIAADLAAK	0.00211	1198.66	1198.66	5.68887	2	0
										VWNYGYANAQAIR	0.00249	1524.75	1524.75	0.592229	2	0
										ADGQPVVIGGIEK	0.00283	1281.69	1281.7	4.55491	2	0
										FYACSMLPYPSGK	0.00542	1536.69	1536.69	4.50254	2	0	FYAC[160]SM[147]LPYPSGK
										IQYNTVVSATMK	0.024	1369.69	1369.7	5.70275	2	0	IQYNTVVSATM[147]K
	P04264.6		Homo sapiens	Keratin, type II cytoskeletal 1	66037.9	8.15059	4	7.76398	31.0559	TNAENEFVTIK	0.000633	1264.63	1264.63	3.99405	2	0
										YEELQITAGR	0.00594	1178.59	1178.6	4.00647	2	0
										SGGGFSSGSAGIINYQR	0.0219	1656.79	1656.79	2.73844	2	0
										LNDLEDALQQAK	0.0366	1356.69	1356.7	6.25494	2	0
	ABF09369.1	Rmet_2492	Cupriavidus metallidurans CH34	aconitate hydratase 1	97943.8	6.58351	4	6.88124	27.525	YIAEGTPTVVFGGEEYGTGSSR	3.66e-06	2278.08	2278.08	1.0645	2	0
										FVEFFGEGTASLTTPDR	5.39e-06	1872.89	1872.9	4.35797	2	0
										TDEEIAAFEGYFR	5.59e-06	1546.69	1546.7	1.62799	2	0
										VDEIPFVVAR	0.021	1143.63	1143.63	4.01092	2	0
	P13645.6	-	Homo sapiens	Keratin, type I cytoskeletal 10	58826.4	5.13429	3	8.56164	25.6849	GSLGGGFSSGGFSGGSFSR	4.31e-07	1706.76	1706.77	5.08037	2	0
										ALEESNYELEGK	0.00327	1380.64	1380.64	2.35253	2	0
										SKELTTEIDNNIEQISSYK	0.00917	2212.1	2212.1	1.13015	3	1
	P00761.1	-	Sus Scrofa	Trypsin	24409.2	6.99753	2	12.1212	24.2424	LGEHNIDVLEGNEQFINAAK	9.24e-06	2210.1	2210.11	4.69527	3	0
										LGEHNIDVLEGNEQFINAAK	1.26e-05	2210.1	2210.11	5.27533	3	0
										LGEHNIDVLEGNEQFINAAK	4.74e-05	2210.1	2210.1	-0.524411	3	0
										LGEHNIDVLEGNEQFINAAK	0.000812	2210.1	2210.1	2.98901	2	0
										VATVSLPR	0.0256	841.502	841.507	5.38917	2	0
	P35908.2	-	Homo sapiens	Keratin, type II cytoskeletal 2 epidermal	65432.1	8.07353	2	8.13772	16.2754	SISISVAGGGGGFGAAGGFGGR	5.35e-05	1837.91	1837.91	3.43652	2	0
										GGGFGGGSSFGGGSGFSGGGFGGGGFGGGR	0.000238	2398.01	2398.03	8.60088	3	0
562	P35527.3	-	Homo sapiens	Keratin, type I cytoskeletal 9	62063.6	5.13619	20	52.3274	1046.55	DIENQYETQITQIEHEVSSSGQEVQSSAK	1.25e-10	3263.51	3263.52	5.5805	3	0
										NHKEEMSQLTGQNSGDVNVEINVAPGK	6.58e-08	2910.38	2910.39	4.38946	3	1	NHKEEM[147]SQLTGQNSGDVNVEINVAPGK
										EIETYHNLLEGGQEDFESSGAGK	1.81e-07	2509.12	2509.14	4.78414	3	0
										GGSGGSHGGGSGFGGESGGSYGGGEEASGSGGGYGGGSGK	4.39e-07	3222.27	3222.3	6.86192	3	0
										HGVQELEIELQSQLSKK	6.72e-06	1965.05	1965.06	5.00902	3	1
										GGGGSFGYSYGGGSGGGFSASSLGGGFGGGSR	2.08e-05	2705.16	2705.16	-0.421047	2	0
										EEMSQLTGQNSGDVNVEINVAPGK	4.98e-05	2531.18	2531.19	4.47854	3	0	EEM[147]SQLTGQNSGDVNVEINVAPGK
										HGVQELEIELQSQLSK	5.04e-05	1836.96	1836.98	9.94688	2	0
										SDLEMQYETLQEELMALK	5.06e-05	2202.01	2202.02	4.10353	2	0	SDLEM[147]QYETLQEELM[147]ALK
										EIETYHNLLEGGQEDFESSGAGK	6.96e-05	2509.12	2509.15	9.67867	2	0
										EEMSQLTGQNSGDVNVEINVAPGK	9.83e-05	2531.18	2531.2	6.09952	2	0	EEM[147]SQLTGQNSGDVNVEINVAPGK
										HGVQELEIELQSQLSK	0.000189	1836.96	1836.97	6.38447	3	0
										DQIVDLTVGNNK	0.000281	1314.68	1314.68	2.8836	2	0
										DIENQYETQITQIEHEVSSSGQEVQSSAK	0.000472	3263.51	3263.53	6.41825	4	0
										EIETYHNLLEGGQEDFESSGAGK	0.000689	2509.12	2509.14	4.2732	3	0
										GFGGASGGGYSSSGGFGGGFGGGSGGGFGGGYGSGFGGFGGFGGGAGGGDGGILTANEK	0.000707	4864.1	4864.12	4.85558	3	0
										HGVQELEIELQSQLSK	0.000887	1836.96	1836.97	5.48733	3	0
										EEMSQLTGQNSGDVNVEINVAPGKDLTK	0.0015	2989.44	2989.45	3.5147	3	1	EEM[147]SQLTGQNSGDVNVEINVAPGKDLTK
										QVLDNLTMEK	0.00172	1205.6	1205.6	5.05476	2	0	QVLDNLTM[147]EK
										LASYLDKVQALEEANNDLENK	0.00219	2376.18	2376.2	6.23479	3	1
										NHKEEMSQLTGQNSGDVNVEINVAPGKDLTK	0.00525	3367.63	3367.67	10.1911	4	2	NHKEEM[147]SQLTGQNSGDVNVEINVAPGKDLTK
										TLLDIDNTR	0.0099	1059.56	1059.56	4.23007	2	0
										IKFEMEQNLR	0.0105	1322.67	1322.67	6.27521	2	1	IKFEM[147]EQNLR
										TLLDIDNTR	0.0126	1059.56	1059.56	5.84301	2	0
										NHKEEMSQLTGQNSGDVNVEINVAPGK	0.0147	2910.38	2910.4	7.84537	4	1	NHKEEM[147]SQLTGQNSGDVNVEINVAPGK
										QEYEQLIAK	0.018	1120.58	1120.58	4.20319	2	0
										VQALEEANNDLENK	0.0223	1586.77	1586.76	-1.21253	2	0
										TLNDMRQEYEQLIAK	0.036	1866.91	1866.92	5.50534	3	1	TLNDM[147]RQEYEQLIAK
										GGSGGSHGGGSGFGGESGGSYGGGEEASGSGGGYGGGSGK	0.0481	3222.27	3222.29	5.83904	3	0
	ABF07136.1	Rmet_0250	Cupriavidus metallidurans CH34	C-terminal processing peptidase	58471.9	9.00671	21	43.9252	922.43	KPVEFGSADDFMLQQAIAQLDGKPVQR	3.49e-06	3003.51	3003.53	4.554	4	0	KPVEFGSADDFM[147]LQQAIAQLDGKPVQR
										LTIAYYYTPSGK	4.08e-06	1375.7	1375.71	3.72537	2	0
										VINPIEDTPAFR	1.11e-05	1370.72	1370.73	4.36194	3	0
										GIRPDIPVDQNPDGDPDDALITR	1.86e-05	2488.22	2488.23	4.58159	3	0
										FAGLGIEISQEEGLVK	3.38e-05	1688.9	1688.9	3.41524	2	0
										FAGLGIEISQEEGLVK	3.46e-05	1688.9	1688.91	5.43905	2	0
										NNGGGVLQGAVGVAAAFLPEDSVVVSTNGQVPDAK	3.61e-05	3337.7	3337.7	-0.920094	3	0
										GIRPDIPVDQNPDGDPDDALITR	3.98e-05	2488.22	2488.23	5.61205	3	0
										LPMVVLTNAYSASASEIVAGALQDHK	7.2e-05	2700.38	2700.4	6.07285	3	0	LPM[147]VVLTNAYSASASEIVAGALQDHK
										GIRPDIPVDQNPDGDPDDALITR	0.000101	2488.22	2488.24	9.39467	2	0
										LSSLEDDPLKDLPAEFKK	0.000182	2045.08	2045.08	-0.561836	3	2
										GIRPDIPVDQNPDGDPDDALITR	0.000232	2488.22	2488.21	-2.99813	3	0
										GIRPDIPVDQNPDGDPDDALITR	0.000239	2490.23	2490.23	-0.338522	3	0
										MLDNNTIGWVR	0.000452	1333.64	1333.65	3.76412	2	0	M[147]LDNNTIGWVR
										GMVASLDPHSAYLDEK	0.00057	1747.81	1747.82	8.24347	2	0	GM[147]VASLDPHSAYLDEK
										KLPMVVLTNAYSASASEIVAGALQDHKR	0.000969	2984.58	2984.58	2.69486	5	2	KLPM[147]VVLTNAYSASASEIVAGALQDHKR
										LMADIFGQIK	0.00125	1150.61	1150.61	5.25897	2	0	LM[147]ADIFGQIK
										NNGGGVLQGAVGVAAAFLPEDSVVVSTNGQVPDAKR	0.00172	3494.81	3494.81	-0.361679	3	1
										GMVASLDPHSAYLDEKDFK	0.00196	2138	2138.01	3.98644	3	1	GM[147]VASLDPHSAYLDEKDFK
										NNGGGVLQGAVGVAAAFLPEDSVVVSTNGQVPDAK	0.00334	3337.7	3337.71	3.02993	3	0
										VTLTIYR	0.00502	864.507	864.511	5.11621	2	0
										GSVQTVRPLTNDTGIK	0.00676	1684.91	1684.92	4.23999	2	0
										VINPIEDTPAFR	0.0086	1370.72	1370.73	5.72911	2	0
										GSVQTVRPLTNDTGIK	0.0101	1684.91	1684.92	4.81153	3	0
										GMVASLDPHSAYLDEKDFK	0.0129	2139.01	2139.01	0.515192	2	1	GM[147]VASLDPHSAYLDEKDFK
										KPVEFGSADDFMLQQAIAQLDGKPVQR	0.0173	3004.52	3004.53	2.71225	3	0	KPVEFGSADDFM[147]LQQAIAQLDGKPVQR
										LMADIFGQIKR	0.0217	1306.71	1306.71	5.15265	3	1	LM[147]ADIFGQIKR
										LSSLEDDPLK	0.0252	1115.57	1115.58	4.81278	2	0
										LPMVVLTNAYSASASEIVAGALQDHKR	0.0304	2856.48	2856.49	3.52252	4	1	LPM[147]VVLTNAYSASASEIVAGALQDHKR
										GMVASLDPHSAYLDEKDFK	0.0304	2138	2138.01	5.12208	4	1	GM[147]VASLDPHSAYLDEKDFK
										LSSLEDDPLKDLPAEFK	0.0307	1915.98	1915.98	3.33981	3	1
										MLDNNTIGWVR	0.0317	1334.65	1334.64	-12.5096	2	0	M[147]LDNNTIGWVR
										KLPMVVLTNAYSASASEIVAGALQDHK	0.0414	2829.48	2829.49	2.02334	4	1	KLPM[147]VVLTNAYSASASEIVAGALQDHK
	P35908.2	-	Homo sapiens	Keratin, type II cytoskeletal 2 epidermal	65432.1	8.07353	13	44.2879	575.743	GGGFGGGSSFGGGSGFSGGGFGGGGFGGGR	9.04e-08	2398.01	2398.02	5.24143	3	0
										MSGDLSSNVTVSVTSSTISSNVASK	5.47e-07	2473.19	2473.19	3.07458	2	0	M[147]SGDLSSNVTVSVTSSTISSNVASK
										NVQDAIADAEQR	9.83e-06	1328.63	1328.64	4.40754	2	0
										MSGDLSSNVTVSVTSSTISSNVASK	1.31e-05	2473.19	2473.2	3.93298	3	0	M[147]SGDLSSNVTVSVTSSTISSNVASK
										VDLLNQEIEFLK	4.72e-05	1459.79	1459.8	5.49393	2	0
										YEELQVTVGR	8.88e-05	1192.61	1192.61	4.24531	2	0
										SISISVAGGGGGFGAAGGFGGR	0.000102	1837.91	1837.91	2.30697	2	0
										NLDLDSIIAEVK	0.000103	1328.72	1328.72	4.48402	2	0
										NKLNDLEEALQQAK	0.000395	1612.84	1612.85	4.28374	3	1
										GGGFGGGSSFGGGSGFSGGGFGGGGFGGGR	0.00047	2398.01	2398.03	5.88321	2	0
										TSQNSELNNMQDLVEDYK	0.00176	2143.95	2143.94	-2.92358	2	0	TSQNSELNNM[147]QDLVEDYK
										GSSSGGGYSSGSSSYGSGGRQSGSRGGSGGGGSISGGGYGSGGGSGGR	0.00243	3980.7	3980.66	-10.2678	3	2
										VLYDAEISQIHQSVTDTNVILSMDNSR	0.00246	3064.49	3064.51	6.64091	3	0	VLYDAEISQIHQSVTDTNVILSM[147]DNSR
										AAFGGSGGRGSSSGGGYSSGSSSYGSGGR	0.0122	2501.07	2501.06	-4.59804	3	1
										FGGFGGPGGVGGLGGPGGFGPGGYPGGIHEVSVNQSLLQPLNVK	0.0338	4093.08	4093.1	5.20219	4	0
	ABF10060.1	Rmet_3188	Cupriavidus metallidurans CH34	unassigned peptidase, M61 subfamily (glycyl aminopeptidase)	66523.9	7.19105	15	36.0927	541.391	TGLVTDQQYVEMLGK	5.11e-07	1696.83	1696.85	6.6353	2	0	TGLVTDQQYVEM[147]LGK
										AGLSAGDLLAAVDGLR	1.15e-06	1498.82	1498.82	0.3396	3	0
										GVTEAEVYALFDDVTGLK	2.52e-05	1926.97	1926.98	2.87187	2	0
										ADAGDVAVPLTK	2.55e-05	1155.61	1155.62	4.70659	2	0
										VVGQDDGPCSVDIHAPAGEAYADWR	8.12e-05	2684.19	2684.2	1.74987	3	0	VVGQDDGPC[160]SVDIHAPAGEAYADWR
										GVTEAEVYALFDDVTGLK	0.000178	1926.97	1926.97	0.679824	3	0
										AGLSAGDLLAAVDGLR	0.000201	1498.82	1498.84	8.35055	2	0
										QSVADSSFDAWTK	0.000292	1440.65	1440.66	4.5403	2	0
										DFYAPGAAQR	0.000366	1094.51	1094.52	3.33847	2	0
										DELQVLPVTLAR	0.00051	1352.77	1352.77	3.58377	2	0
										YQAADYDELIDHPVEMGTFALASFR	0.000776	2874.32	2874.33	4.60492	3	0	YQAADYDELIDHPVEM[147]GTFALASFR
										ALTEGTGEIGLVPLFR	0.000826	1671.92	1671.93	5.88844	2	0
										AGLSAGDLLAAVDGLR	0.000999	1497.82	1497.82	4.02787	2	0
										AEVQKPDGTAALGIK	0.00109	1496.82	1496.83	4.47682	3	0
										GSLVALALDLTIR	0.00129	1340.8	1340.81	4.97538	2	0
										AAHLDTTHGFFNGSSVFLR	0.00385	2076.02	2076.03	7.05533	3	0
										VPQLDLQR	0.00475	967.545	967.55	4.6034	2	0
										AEVQKPDGTAALGIK	0.0318	1496.82	1496.83	5.9132	2	0
										TGLVTDQQYVEMLGK	0.042	1696.83	1696.85	8.36204	2	0	TGLVTDQQYVEM[147]LGK
										RDELQVLPVTLAR	0.0471	1508.87	1508.87	4.13025	3	1
										ALTEGTGEIGLVPLFR	0.0479	1671.92	1671.92	1.60893	3	0
	ABF10106.1	Rmet_3234	Cupriavidus metallidurans CH34	outer membrane protein (porin)	41949.2	8.9723	10	52.1197	521.197	EMSASVMYNGGPFSVGAIYDETNVGIAAADGAK	1.11e-08	3323.5	3323.52	5.85257	3	0	EM[147]SASVM[147]YNGGPFSVGAIYDETNVGIAAADGAK
										GVFVLESGFNVDTGTSGQNNR	1.96e-05	2197.04	2197.05	2.96217	2	0
										YAHAQGGAVLPGGVNTVDGAAK	2e-05	2052.04	2052.05	3.95655	2	0
										NTGADPWSFVVSTDYAFSK	2.54e-05	2090.96	2090.98	8.0829	2	0
										GVFVLESGFNVDTGTSGQNNR	7.06e-05	2197.04	2197.05	5.67855	3	0
										TSIAGTYAFGPAK	7.2e-05	1282.66	1282.66	3.69858	2	0
										RTDAYFNVAYTK	0.000103	1447.71	1447.71	3.53386	2	1
										NKDGSTLGTSSASPGSLGGSGFGTTLGSYNQFGAMVGLR	0.000407	3753.79	3753.81	5.67426	3	1	NKDGSTLGTSSASPGSLGGSGFGTTLGSYNQFGAM[147]VGLR
										DGSTLGTSSASPGSLGGSGFGTTLGSYNQFGAMVGLR	0.00119	3511.65	3511.67	4.38284	3	0	DGSTLGTSSASPGSLGGSGFGTTLGSYNQFGAM[147]VGLR
										QAFVGMQSQFGTLTLGR	0.0014	1855.93	1855.93	4.06159	2	0	QAFVGM[147]QSQFGTLTLGR
										GVFVLESGFNVDTGTSGQNNR	0.00285	2198.05	2198.04	-1.47631	2	0
										HQTPFYDFGLAFDPMAISPNYSITAQAPEFQQR	0.00414	3805.8	3805.8	1.84403	3	0	HQTPFYDFGLAFDPM[147]AISPNYSITAQAPEFQQR
										RTDAYFNVAYTK	0.00488	1447.71	1447.71	1.79594	3	1
										QAFVGMQSQFGTLTLGR	0.00573	1838.92	1838.91	-8.17381	2	0
										YAHAQGGAVLPGGVNTVDGAAK	0.0119	2052.04	2052.05	5.67484	3	0
										TSIAGTYAFGPAK	0.0248	1282.66	1282.67	7.88598	2	0
										QAFVGMQSQFGTLTLGR	0.0487	1856.93	1856.93	-2.2451	2	0	QAFVGM[147]QSQFGTLTLGR
	ABF09108.1	Rmet_2229	Cupriavidus metallidurans CH34	ABC-type sugar transporter, periplasmic component, probable sugar binding precursor	64792.8	8.48233	14	33.7931	473.103	FTDAWLSMAGSADK	1.16e-06	1514.67	1514.68	2.97292	2	0	FTDAWLSM[147]AGSADK
										TPQVAMDTLAEEMDNVMGR	3.18e-05	2154.92	2154.93	2.07664	2	0	TPQVAM[147]DTLAEEM[147]DNVM[147]GR
										TPQVAMDTLAEEMDNVMGR	4.18e-05	2154.92	2154.93	5.29903	3	0	TPQVAM[147]DTLAEEM[147]DNVM[147]GR
										GGATNSPAAVYALTK	9.79e-05	1419.74	1419.74	4.6565	2	0
										GLPVVNADGSPK	0.000164	1152.61	1152.62	4.4282	2	0
										VNHDIIQEGDVVEK	0.00046	1593.8	1593.81	5.00941	2	0
										AFEEITGIK	0.000701	1006.53	1006.54	4.63869	2	0
										WVDNEFQPSSLSK	0.00155	1536.73	1536.73	-3.60765	2	0
										LYQLPDQQFANLYWFR	0.00276	2103.06	2103.05	-3.38269	2	0
										YGAILPLSDYMTGVGK	0.00977	1699.85	1699.86	8.11484	2	0	YGAILPLSDYM[147]TGVGK
										VAWTPTGNNVPDYPK	0.00995	1657.81	1657.82	4.71948	2	0
										VNHDIIQEGDVVEK	0.0156	1593.8	1593.81	4.77099	3	0
										QGMQNGYQDVGSWTFFK	0.0158	2008.89	2008.87	-7.39912	2	0	QGM[147]QNGYQDVGSWTFFK
										SIYDGWISDSDLIGTHYR	0.0188	2096.98	2096.99	6.39062	3	0
										MAPSPYGPYWK	0.0224	1311.6	1311.6	3.92346	2	0	M[147]APSPYGPYWK
										LAQLWWK	0.023	943.528	943.531	3.31522	2	0
	ABF08863.1	Rmet_1984	Cupriavidus metallidurans CH34	L-Aspartate decarboxylase	60464.7	6.62803	14	32.8996	460.595	VSLANLNEEDYVK	7.8e-06	1492.74	1492.75	4.49844	2	0
										NTLLVYSYSK	9.32e-06	1186.62	1186.63	3.90604	2	0
										GMGVAPEAVDENVVDYYTLLDVEQMSR	1.87e-05	3031.38	3031.41	9.9298	3	0	GM[147]GVAPEAVDENVVDYYTLLDVEQM[147]SR
										HGFWQLGQFAMIESER	3.71e-05	1950.9	1950.91	4.24008	3	0	HGFWQLGQFAM[147]IESER
										LAEEAGVVLLPGGGFGTR	6.08e-05	1741.94	1741.95	10.2128	2	0
										AFFLVNPSNPPSVK	0.000123	1515.81	1515.81	4.1087	2	0
										SNLFDEQLANLPK	0.000126	1487.76	1487.77	3.63432	3	0
										GNPNFLATIPR	0.00053	1198.65	1198.65	2.02979	2	0
										YSSITTEPEKLPFIDR	0.000624	1894.97	1894.97	3.17156	3	1
										GMGVAPEAVDENVVDYYTLLDVEQMSR	0.00174	3032.39	3032.4	5.064	2	0	GM[147]GVAPEAVDENVVDYYTLLDVEQM[147]SR
										GNPNFLATIPR	0.00175	1198.65	1198.65	4.88134	2	0
										YSSITTEPEKLPFIDR	0.00386	1894.97	1894.98	4.62805	2	1
										SFSYLPEGVGGFPR	0.00389	1511.74	1511.75	7.14607	2	0
										AFFLVNPSNPPSVK	0.0042	1515.81	1515.82	5.06594	3	0
										HGFWQLGQFAMIESER	0.0059	1950.9	1950.91	1.5562	2	0	HGFWQLGQFAM[147]IESER
										FLTGAVSYVR	0.00651	1111.6	1111.61	4.86775	2	0
										LAEEAGVVLLPGGGFGTR	0.00748	1741.94	1741.94	4.84403	3	0
										LAEEAGVVLLPGGGFGTR	0.00858	1742.94	1742.95	4.68116	2	0
										FLTGAVSYVR	0.0121	1111.6	1111.61	4.31809	2	0
										LASLSPFELKDELIK	0.0173	1701.96	1701.96	4.04828	3	1
										LAEEAGVVLLPGGGFGTR	0.0368	1741.94	1741.94	4.39626	2	0
										LASLSPFELK	0.0431	1102.61	1102.61	-7.65635	2	0
										LPFIDR	0.0479	759.428	759.432	5.41987	2	0
	ABF08849.1	Rmet_1970	Cupriavidus metallidurans CH34	PhoH family protein	61795	7.74155	12	35.8156	429.787	ADNQILAVVSALQQQYPDR	6.98e-08	2128.09	2128.1	4.64642	2	0
										VALLETGDTNAPATAR	1.86e-05	1598.83	1598.84	6.17766	2	0
										FVIIDEAQNLTPK	8.5e-05	1486.8	1486.81	5.12442	2	0
										APSATPAVSLVQPGASPTR	0.000104	1805.96	1805.97	5.49402	2	0
										IVCLGNIAQIDTPYLTEGSSGLTYVVDR	0.000615	3055.55	3055.55	-2.19862	3	0	IVC[160]LGNIAQIDTPYLTEGSSGLTYVVDR
										ALGLPAEDYFNDQVLEDK	0.00112	2035.97	2035.98	3.41655	2	0
										LNDIKLPEGLPQGK	0.0025	1520.86	1520.86	4.04838	2	1
										LYNEIIVTR	0.00316	1119.63	1119.63	5.2964	2	0
										ADNQILAVVSALQQQYPDR	0.00324	2128.09	2128.1	2.05865	3	0
										ATVPVGEDIGFLPGTEEEK	0.00362	1986.98	1986.99	5.96333	2	0
										NNVWSVVAR	0.00649	1043.55	1043.56	6.44817	2	0
										FEEHDIYLPMMTLEELDNHKK	0.0093	2663.22	2663.24	4.36013	5	1	FEEHDIYLPM[147]M[147]TLEELDNHKK
										MQPWMGAFDDNLEVLQK	0.0143	2052.93	2052.94	5.75373	2	0	M[147]QPWM[147]GAFDDNLEVLQK
										LNDIKLPEGLPQGK	0.0266	1520.86	1520.86	4.98272	3	1
	Q1LQS4.1	Rmet_0616	Cupriavidus metallidurans CH34	60 kDa chaperonin	57377.3	5.11332	10	29.9817	299.817	TSDNAGDGTTTATVLAQSIVR	6.79e-07	2077.03	2077.04	4.78039	2	0
										EIAQVGAISANSDASIGER	1.21e-06	1886.93	1886.94	4.10825	2	0
										SLADELEVVEGMQFDR	1.75e-06	1852.85	1852.86	4.57835	3	0	SLADELEVVEGM[147]QFDR
										QIVLNAGEEASVVVAK	3.05e-06	1625.9	1625.91	4.54333	2	0
										GNYGYNAASGEYGDLVEMGVLDPTK	3.12e-06	2635.17	2635.2	8.74249	3	0	GNYGYNAASGEYGDLVEM[147]GVLDPTK
										GNYGYNAASGEYGDLVEMGVLDPTK	3.32e-06	2635.17	2635.19	7.07999	2	0	GNYGYNAASGEYGDLVEM[147]GVLDPTK
										FVAAGMNPMDLK	7.81e-05	1324.62	1324.62	4.92898	2	0	FVAAGM[147]NPM[147]DLK
										IEIGKENTIIIDGAGDASAIEGR	0.000357	2341.21	2341.22	2.09678	3	1
										QIVLNAGEEASVVVAK	0.000607	1625.9	1625.91	4.76044	3	0
										GYLSPYFINNPEK	0.00203	1540.76	1540.76	5.23185	2	0
										AAIAGLHGENPDQNAGIK	0.00551	1774.9	1774.91	5.02227	2	0
										RIEIGKENTIIIDGAGDASAIEGR	0.0435	2497.31	2497.32	4.41434	4	2
	P13645.6	-	Homo sapiens	Keratin, type I cytoskeletal 10	58826.4	5.13429	11	27.0548	297.603	NVSTGDVNVEMNAAPGVDLTQLLNNMR	1.19e-07	2903.38	2903.39	4.00637	3	0	NVSTGDVNVEM[147]NAAPGVDLTQLLNNM[147]R
										NVQALEIELQSQLALK	4.15e-06	1796	1796.01	5.43985	2	0
										SKELTTEIDNNIEQISSYK	1.72e-05	2211.09	2211.09	1.87645	2	1
										NVSTGDVNVEMNAAPGVDLTQLLNNMR	2.2e-05	2904.38	2904.4	5.98922	2	0	NVSTGDVNVEM[147]NAAPGVDLTQLLNNM[147]R
										NQILNLTTDNANILLQIDNAR	2.28e-05	2368.27	2368.27	-2.04917	3	0
										SKELTTEIDNNIEQISSYK	5.43e-05	2211.09	2211.1	2.8642	3	1
										GSLGGGFSSGGFSGGSFSR	9.22e-05	1706.76	1706.78	6.43908	2	0
										NQILNLTTDNANILLQIDNAR	0.000114	2367.26	2367.27	2.30773	2	0
										QSLEASLAETEGR	0.000141	1389.67	1389.68	3.66777	2	0
										NVQALEIELQSQLALK	0.000748	1796	1796.02	9.10243	3	0
										VLDELTLTK	0.00181	1030.59	1030.59	2.02408	2	0
										IRLENEIQTYR	0.00542	1433.76	1433.77	3.40014	2	1
										ALEESNYELEGK	0.00931	1380.64	1380.66	11.725	2	0
										QSVEADINGLR	0.0133	1200.61	1200.62	7.29712	2	0
										LENEIQTYR	0.0298	1164.58	1164.58	5.54364	2	0
	ABF10044.1	Rmet_3172	Cupriavidus metallidurans CH34	Nitrite reductase precursor (Cytochrome cd1) (Cytochrome oxidase) (Hydroxylamine reductase)	60768.5	8.83957	10	27.8689	278.689	DSGEVALIDGDSK	8.29e-06	1304.61	1304.62	4.58681	2	0
										LNQSVAVFDTQK	9.81e-05	1348.7	1348.71	5.35776	2	0
										SHNLWVDTPLNPDAK	0.000279	1705.84	1705.85	4.2841	3	0
										VLPIAEWANLK	0.000335	1252.72	1252.72	4.21563	2	0
										ILMVDYSDLK	0.000611	1211.61	1211.62	4.27365	2	0	ILM[147]VDYSDLK
										DGESALVVVDDKTR	0.000985	1502.76	1502.76	4.79252	3	1
										DGESALVVVDDKTR	0.00187	1502.76	1502.77	7.96935	2	1
										VASIVASHFRPEFVINAK	0.00267	1984.09	1984.1	3.60266	3	0
										MNNYNLQNLFSVTLR	0.00354	1842.92	1842.91	-2.31481	2	0	M[147]NNYNLQNLFSVTLR
										YIQLDPPTPPEFSLADIEK	0.00527	2172.1	2172.11	5.02095	2	0
										YGSPAGMPNWGTSGDLTDPEVDLMAR	0.00577	2769.21	2769.21	-0.500864	3	0	YGSPAGM[147]PNWGTSGDLTDPEVDLM[147]AR
										SHNLWVDTPLNPDAK	0.0165	1705.84	1705.85	6.93909	2	0
										YIQLDPPTPPEFSLADIEK	0.0274	2172.1	2172.11	5.2958	3	0
	P04264.6	-	Homo sapiens	Keratin, type II cytoskeletal 1	66037.9	8.15059	12	17.8571	214.286	QISNLQQSISDAEQR	3.2e-07	1715.84	1715.85	4.48467	2	0
										TNAENEFVTIK	7.34e-05	1264.63	1264.64	4.37994	2	0
										SLDLDSIIAEVK	0.000106	1301.71	1301.71	3.94712	2	0
										YEELQITAGR	0.000114	1178.59	1178.6	4.62755	2	0
										SLNNQFASFIDK	0.000209	1382.68	1382.69	4.44932	2	0
										QISNLQQSISDAEQR	0.000266	1715.84	1715.85	4.65485	3	0
										YEELQITAGR	0.000391	1178.59	1178.6	5.35299	2	0
										LNDLEDALQQAK	0.000399	1356.69	1356.69	4.00534	2	0
										LNDLEDALQQAKEDLAR	0.00294	1940.98	1940.99	6.05519	3	1
										NKLNDLEDALQQAK	0.00401	1598.83	1598.83	4.68031	3	1
										QISNLQQSISDAEQRGENALK	0.00578	2328.17	2328.18	5.3424	3	1
										SGGGFSSGSAGIINYQR	0.00624	1656.79	1656.79	4.35904	2	0
										TNAENEFVTIKK	0.00869	1392.72	1392.73	5.38513	2	1
										SKAEAESLYQSKYEELQITAGR	0.022	2500.24	2500.26	4.60035	4	2
										YEELQITAGR	0.0418	1179.6	1179.6	0.908782	2	0
	P08779.4	-	Homo sapiens	Keratin, type I cytoskeletal 16	51267.2	4.98474	6	21.9873	131.924	GQTGGDVNVEMDAAPGVDLSR	5.92e-08	2102.95	2102.97	5.50702	2	0	GQTGGDVNVEM[147]DAAPGVDLSR
										APSTYGGGLSVSSR	8.43e-07	1337.66	1337.67	6.49643	2	0
										TEELNKEVASNSELVQSSR	0.000744	2120.05	2120.05	3.35559	3	1
										LLEGEDAHLSSQQASGQSYSSR	0.00125	2349.08	2349.09	3.18592	3	0
										IIAATIENAQPILQIDNAR	0.00459	2064.15	2064.15	4.63969	2	0
										DAETWFLSK	0.00553	1095.52	1095.53	8.00348	2	0
	ABF08838.1	Rmet_1959	Cupriavidus metallidurans CH34	ATP-dependent Clp protease, ATP-binding subunit ClpB (protein disaggregation chaperone)	95941.5	5.73075	7	15.4292	108.005	TQVGAEEIAEVVSR	9.32e-07	1486.76	1486.77	4.38806	2	0
										DVVPVDYVDGEFTFGR	0.000124	1813.85	1813.84	-5.72704	2	0
										LIGAPPGYVGYDEGGYLTEAVR	0.000269	2297.15	2297.16	7.75658	2	0
										DLNNLLNATEK	0.000328	1243.64	1243.64	2.85613	2	0
										VLVDEPSVEATIAILR	0.00161	1723.97	1723.98	6.31275	2	0
										NTVIVMTSNLGSHIIQSMAGEPQEAVK	0.0244	2885.43	2885.44	5.65705	3	0	NTVIVM[147]TSNLGSHIIQSM[147]AGEPQEAVK
										FQEALAEAQSLALGNDNQYIEPQHLLR	0.0286	3068.54	3068.55	3.43322	3	0
	P02533.4	-	Homo sapiens	Keratin, type I cytoskeletal 14	51560.9	5.08769	5	15.0424	75.2119	APSTYGGGLSVSSSR	1.37e-06	1424.69	1424.7	6.92361	2	0
										TMQNLEIELQSQLSMK	0.000133	1923.93	1923.93	3.51468	3	0	TM[147]QNLEIELQSQLSM[147]K
										DAEEWFFTK	0.000188	1171.52	1171.53	5.57396	2	0
										GQVGGDVNVEMDAAPGVDLSR	0.000332	2100.97	2100.98	4.823	2	0	GQVGGDVNVEM[147]DAAPGVDLSR
										TKYETELNLR	0.00904	1265.66	1265.67	3.39822	2	1
	ABF07608.1	Rmet_0722	Cupriavidus metallidurans CH34	30S ribosomal subunit protein S1	61648.1	5.14501	5	13.2979	66.4894	ALEDGEIISGTVTGK	8.86e-07	1488.77	1488.77	5.10489	2	0
										QLSGDPFNNFISANDK	0.00277	1765.83	1765.84	6.07987	2	0
										AVVEATLGEER	0.00696	1172.6	1172.61	3.03257	2	0
										GAVVQLADDVEGYLR	0.0245	1603.82	1603.83	4.53168	2	0
										FQADTGTAGTTNLGALLK	0.0398	1780.94	1780.91	-20.2179	2	0
	ABF08483.1	Rmet_1600	Cupriavidus metallidurans CH34	conserved hypothetical protein; putative exported protein	64944.2	9.54423	5	13.1148	65.5738	ALLAGLDLAPR	0.000123	1108.66	1108.66	4.01024	2	0
										LAQGETDYLSGMAGEAR	0.000206	1783.8	1783.81	2.87307	2	0	LAQGETDYLSGM[147]AGEAR
										LNSTAIAIEPDVR	0.000576	1397.75	1397.76	5.06099	2	0
										TLVTYGGSAEMPPSANDNAAVR	0.00206	2237.05	2237.06	5.05621	2	0	TLVTYGGSAEM[147]PPSANDNAAVR
										LVPGVAAAQGQEIVGAR	0.00385	1634.91	1634.92	7.37349	2	0
	P13647.3	-	Homo sapiens	Keratin, type II cytoskeletal 5	62377.6	7.58353	5	12.5424	62.7119	VDALMDEINFMK	3.33e-05	1456.66	1456.66	4.46708	2	0	VDALM[147]DEINFM[147]K
										ISISTSGGSFR	0.000413	1110.57	1110.57	4.44458	2	0
										MFFDAELSQMQTHVSDTSVVLSMDNNR	0.000496	3150.38	3150.38	-0.239019	3	0	M[147]FFDAELSQM[147]QTHVSDTSVVLSM[147]DNNR
										LAELEEALQK	0.000663	1142.62	1142.62	5.08919	2	0
										SFSTASAITPSVSR	0.00213	1409.72	1409.72	3.98591	2	0
	ABF09040.1	Rmet_2161	Cupriavidus metallidurans CH34	conserved hypothetical protein	54635.5	7.17509	4	12.4224	49.6894	SLDQATLVTSMAQVYDER	3.77e-06	2042.97	2042.98	6.10043	2	0	SLDQATLVTSM[147]AQVYDER
										YVPEGDVVQPR	0.00121	1257.64	1257.64	6.50188	2	0
										QDALEYGSTFDLR	0.0013	1514.71	1514.71	-1.57588	2	0
										MNQPIQLVLPQTYDETAK	0.00294	2105.06	2105.06	-1.23227	2	0	M[147]NQPIQLVLPQTYDETAK
	P00761.1	-	Sus Scrofa	Trypsin	24409.2	6.99753	3	16.4502	49.3506	LGEHNIDVLEGNEQFINAAK	5.15e-08	2210.1	2210.11	5.08801	2	0
										LGEHNIDVLEGNEQFINAAK	1.14e-05	2211.1	2211.11	0.3098	3	0
										LGEHNIDVLEGNEQFINAAK	3.44e-05	2210.1	2210.11	6.26941	3	0
										LGEHNIDVLEGNEQFINAAK	8.03e-05	2210.1	2210.11	5.19253	3	0
										LGEHNIDVLEGNEQFINAAK	0.000186	2211.1	2211.12	5.77539	3	0
										LGEHNIDVLEGNEQFINAAK	0.000307	2210.1	2210.11	4.69527	3	0
										LGEHNIDVLEGNEQFINAAK	0.000308	2210.1	2210.11	5.27533	3	0
										LGEHNIDVLEGNEQFINAAK	0.000361	2211.1	2211.11	1.8891	2	0
										LGEHNIDVLEGNEQFINAAK	0.000652	2210.1	2210.09	-2.75508	2	0
										LGEHNIDVLEGNEQFINAAK	0.00959	2211.1	2211.11	3.45664	3	0
										VATVSLPR	0.0144	841.502	841.507	6.18774	2	0
										LSSPATLNSR	0.0155	1044.56	1044.56	4.2037	2	0
										VATVSLPR	0.017	841.502	841.506	4.66428	2	0
										VATVSLPR	0.0204	841.502	841.506	4.44681	2	0
	ABF09369.1	Rmet_2492	Cupriavidus metallidurans CH34	aconitate hydratase 1	97943.8	6.58351	5	9.76693	48.8346	TDEEIAAFEGYFR	4.42e-06	1546.69	1546.7	4.9428	2	0
										YIAEGTPTVVFGGEEYGTGSSR	4.29e-05	2276.06	2276.07	6.20326	2	0
										GQYYSLPQLGK	0.000101	1252.65	1252.65	7.64063	2	0
										FVEFFGEGTASLTTPDR	0.000247	1872.89	1872.89	1.7513	2	0
										STYIAEPPFFQDFALEPSGEAVTVR	0.00806	2771.36	2771.37	4.98456	3	0
	P04259.5	-	Homo sapiens	Keratin, type II cytoskeletal 6B	60066.2	8.09057	4	10.8156	43.2624	ALYDAELSQMQTHISDTSVVLSMDNNR	6e-06	3069.4	3069.43	8.58278	3	0	ALYDAELSQM[147]QTHISDTSVVLSM[147]DNNR
										WTLLQEQGTK	0.00163	1202.63	1202.63	3.81747	2	0
										NKLEGLEDALQK	0.0321	1356.72	1356.73	6.42798	2	1
										ADTLTDEINFLR	0.0462	1406.7	1406.71	3.49825	2	0
	Q1LI20.1	Rmet_3334	Cupriavidus metallidurans CH34	DNA-directed RNA polymerase subunit beta	152495	5.57048	6	6.50585	39.0351	DIQTLYTNDLDQGPYISQTLR	0.000139	2453.21	2453.22	4.42237	3	0
										LFYSEESYDLSR	0.000496	1507.68	1507.69	2.017	2	0
										LSRPSGEGSMVLQDEDILETIK	0.000503	2432.21	2432.22	5.4765	3	0	LSRPSGEGSM[147]VLQDEDILETIK
										GSWLDFEFDPK	0.000703	1339.61	1339.61	0.656908	2	0
										DIQTLYTNDLDQGPYISQTLR	0.0028	2455.22	2455.22	0.68059	2	0
										VSALGPGGLTR	0.0086	1026.58	1026.58	2.55021	2	0
										LISVPEDYLLGR	0.0307	1373.76	1373.76	5.50899	2	0
	ABF07854.1	Rmet_0968	Cupriavidus metallidurans CH34	Acyl-CoA dehydrogenase (ACAD)	47061.8	7.17165	3	7.85714	23.5714	VPVSNILLGEGR	3.69e-05	1252.71	1252.72	3.52914	2	0
										LNPDSIQMPITR	0.000669	1399.71	1399.72	6.0541	2	0	LNPDSIQM[147]PITR
										FYAEIQANR	0.000779	1110.55	1110.55	5.44327	2	0
	ABF12199.1	Rmet_5340	Cupriavidus metallidurans CH34	hemolysin activator translocator (plasmid)	64248	8.57799	3	7.65306	22.9592	LYALDMMTIGSR	0.00499	1402.67	1402.67	-2.34909	2	0	LYALDM[147]M[147]TIGSR
										NELQAPVANTGQALYAGLDYGR	0.0132	2322.16	2322.17	3.31157	2	0
										SQSDVLGLQFR	0.0425	1248.65	1248.64	-1.2021	2	0
	ABF12494.1	Rmet_5635	Cupriavidus metallidurans CH34	penicillin amidase (peptidase S45) (plasmid)	90378.2	8.48458	3	5.41872	16.2562	GEYFPLLYSR	0.00063	1243.62	1243.63	5.81446	2	0
										MVVDVGNWDASR	0.00801	1363.62	1363.63	8.83091	2	0	M[147]VVDVGNWDASR
										FYMDQEDLYAYETDPAQPHEYK	0.00844	2768.16	2768.19	10.3043	3	0	FYM[147]DQEDLYAYETDPAQPHEYK
	ABF10020.1	Rmet_3148	Cupriavidus metallidurans CH34	acyl-CoA synthetase (long-chain-fatty-acid-CoA ligase)	61094.1	7.56659	2	6.42857	12.8571	GAIVNFVVR	0.0106	973.571	973.576	5.13573	2	0
										MTLKPVNTGPDDVAFLQYTGGTTGVSK	0.0204	2812.4	2812.4	0.104537	3	0	M[147]TLKPVNTGPDDVAFLQYTGGTTGVSK
	P19012.3	-	Homo sapiens	Keratin, type I cytoskeletal 15	49211.2	4.71008	2	5.04386	10.0877	ALEEANADLEVK	2.18e-05	1300.65	1300.66	4.53235	2	0
										TRLEQEIATYR	0.000951	1378.72	1378.73	4.92486	2	1
	ABF09250.1	Rmet_2373	Cupriavidus metallidurans CH34	conserved hypothetical protein	59637.5	8.00974	2	4.4964	8.99281	IVLAEFAYGGK	4.77e-05	1166.63	1166.63	1.21975	2	0
										SGQALFTQPPMPIK	0.000609	1529.79	1529.8	3.78156	2	0	SGQALFTQPPM[147]PIK
	ABF09022.1	Rmet_2143	Cupriavidus metallidurans CH34	transporter subunits of ABC superfamily: ATP-binding component	60528.2	7.78263	2	4.18944	8.37887	MQVVFQDPFGSLSPR	0.00125	1722.84	1722.85	5.10843	2	0	M[147]QVVFQDPFGSLSPR
										AQILDLLR	0.0444	940.571	940.576	5.47753	2	0
	Q02413.2	-	Homo sapiens	Desmoglein-1	113746	4.90341	2	2.85987	5.71973	YVMGNNPADLLAVDSR	0.000119	1750.84	1750.85	2.50279	2	0	YVM[147]GNNPADLLAVDSR
										YQGTILSIDDNLQR	0.000718	1635.83	1635.83	-0.371676	2	0
586	ABF09108.1	Rmet_2229	Cupriavidus metallidurans CH34	ABC-type sugar transporter, periplasmic component, probable sugar binding precursor	64792.8	8.48233	23	52.069	1197.59	TPQVAMDTLAEEMDNVMGR	1.57e-11	2138.93	2138.94	4.50179	2	0	TPQVAM[147]DTLAEEMDNVM[147]GR
										QGMQNGYQDVGSWTFFK	1.05e-08	1991.88	1991.85	-18.976	2	0
										FTDAWLSMAGSADK	1.91e-08	1514.67	1514.68	4.90668	2	0	FTDAWLSM[147]AGSADK
										TPQVAMDTLAEEMDNVMGR	2.85e-08	2154.92	2154.94	5.89395	3	0	TPQVAM[147]DTLAEEM[147]DNVM[147]GR
										TPQVAMDTLAEEMDNVMGR	1.44e-07	2138.93	2138.94	5.12313	3	0	TPQVAM[147]DTLAEEMDNVM[147]GR
										FTDAWLSMAGSADK	6.01e-07	1498.68	1498.68	4.89565	2	0
										TPQVAMDTLAEEMDNVMGR	1.31e-06	2154.92	2154.93	3.776	2	0	TPQVAM[147]DTLAEEM[147]DNVM[147]GR
										TPQVAMDTLAEEMDNVMGR	4.32e-06	2154.92	2154.94	5.97887	3	0	TPQVAM[147]DTLAEEM[147]DNVM[147]GR
										QGMQNGYQDVGSWTFFK	5.26e-06	1991.88	1991.85	-16.2183	2	0
										FTDAWLSMAGSADK	6.2e-06	1514.67	1514.67	2.16681	2	0	FTDAWLSM[147]AGSADK
										GLPVVNADGSPK	1.42e-05	1152.61	1152.62	5.27583	2	0
										YGAILPLSDYMTGVGK	1.45e-05	1699.85	1699.86	5.88876	2	0	YGAILPLSDYM[147]TGVGK
										KWVDNEFQPSSLSK	1.71e-05	1663.82	1663.83	7.00977	2	1
										GVTQINVVSETITTHEYESK	2.12e-05	2234.11	2234.12	5.52122	2	0
										FTDAWLSMAGSADK	2.95e-05	1514.67	1514.68	2.56953	2	0	FTDAWLSM[147]AGSADK
										GGATNSPAAVYALTK	3.11e-05	1419.74	1419.74	6.11804	2	0
										TPQVAMDTLAEEMDNVMGR	3.35e-05	2138.93	2138.95	9.98023	2	0	TPQVAM[147]DTLAEEM[147]DNVMGR
										VNHDIIQEGDVVEK	3.94e-05	1593.8	1593.81	6.38788	2	0
										YGAILPLSDYMTGVGK	3.95e-05	1699.85	1699.86	3.73445	2	0	YGAILPLSDYM[147]TGVGK
										YGGLIEFYR	3.97e-05	1116.56	1116.57	5.03152	2	0
										GVTQINVVSETITTHEYESK	9.06e-05	2234.11	2234.12	6.36227	3	0
										QGMQNGYQDVGSWTFFK	9.11e-05	1993.9	1993.86	-19.2507	2	0
										YGAILPLSDYMTGVGK	0.000118	1683.85	1683.86	3.64105	2	0
										QGMQNGYQDVGSWTFFK	0.000126	2007.88	2007.89	3.3518	2	0	QGM[147]QNGYQDVGSWTFFK
										NADKYGGLIEFYR	0.000127	1545.77	1545.78	3.53545	2	1
										TPQVAMDTLAEEMDNVMGR	0.000202	2138.93	2138.94	5.03757	3	0	TPQVAMDTLAEEM[147]DNVM[147]GR
										TPQVAMDTLAEEMDNVMGR	0.000384	2154.92	2154.94	6.04198	2	0	TPQVAM[147]DTLAEEM[147]DNVM[147]GR
										GLPNGMPVDEWGIR	0.000584	1555.75	1555.75	4.96675	2	0	GLPNGM[147]PVDEWGIR
										SIYDGWISDSDLIGTHYR	0.000618	2097.99	2098	5.35227	2	0
										GGATNSPAAVYALTK	0.000626	1419.74	1419.74	5.34466	2	0
										LAAAWLYAQFVTSK	0.00154	1567.84	1567.85	4.98265	3	0
										YGGLIEFYR	0.00159	1116.56	1116.57	7.10933	2	0
										LAAAWLYAQFVTSK	0.00201	1567.84	1567.85	4.56297	2	0
										LYQLPDQQFANLYWFR	0.00215	2101.04	2101.05	3.68389	3	0
										TPQVAMDTLAEEMDNVMGR	0.00224	2139.94	2139.94	1.10517	3	0	TPQVAM[147]DTLAEEM[147]DNVMGR
										AFEEITGIK	0.00242	1006.53	1006.54	5.42754	2	0
										TPQVAMDTLAEEMDNVMGR	0.00258	2139.94	2139.95	4.27723	2	0	TPQVAMDTLAEEM[147]DNVM[147]GR
										YGAILPLSDYMTGVGK	0.0026	1699.85	1699.86	7.03768	2	0	YGAILPLSDYM[147]TGVGK
										EYTNPGIDIK	0.00377	1148.57	1148.58	5.02189	2	0
										TPQVAMDTLAEEMDNVMGR	0.00385	2123.94	2123.95	2.44781	3	0	TPQVAM[147]DTLAEEMDNVMGR
										YGGLIEFYR	0.00389	1116.56	1116.57	8.09271	2	0
										VNHDIIQEGDVVEK	0.00395	1593.8	1593.81	5.80499	3	0
										NVATAVTGEK	0.00444	988.519	988.525	5.71158	2	0
										WVDNEFQPSSLSK	0.00467	1535.73	1535.73	4.17132	2	0
										TPQVAMDTLAEEMDNVMGR	0.00527	2154.92	2154.94	7.67823	3	0	TPQVAM[147]DTLAEEM[147]DNVM[147]GR
										YGGLIEFYR	0.00576	1116.56	1116.57	10.1705	2	0
										QGMQNGYQDVGSWTFFK	0.00661	1990.88	1990.86	-9.12061	2	0
										NADKYGGLIEFYR	0.00712	1544.76	1544.77	5.77306	3	1
										LAAAWLYAQFVTSK	0.00727	1566.83	1566.82	-8.37486	2	0
										LYQLPDQQFANLYWFR	0.0074	2101.04	2101.06	9.26778	2	0
										YGYDLGVPTNWSAYEDIANFFTNDVK	0.00822	2999.37	2999.38	2.62621	3	0
										SLTGLTFIR	0.00845	1006.58	1006.59	4.62755	2	0
										VAWTPTGNNVPDYPK	0.0086	1657.81	1657.81	1.70044	2	0
										QGMQNGYQDVGSWTFFK	0.00977	2009.89	2009.88	-8.17854	2	0	QGM[147]QNGYQDVGSWTFFK
										TPQVAMDTLAEEMDNVMGR	0.0098	2138.93	2138.95	9.48933	3	0	TPQVAM[147]DTLAEEMDNVM[147]GR
										TPQVAMDTLAEEMDNVMGR	0.0112	2154.92	2154.93	1.51003	2	0	TPQVAM[147]DTLAEEM[147]DNVM[147]GR
										LAQLWWK	0.012	943.528	943.532	4.47999	2	0
										VAWTPTGNNVPDYPK	0.0135	1657.81	1657.82	4.05656	2	0
										TPQVAMDTLAEEMDNVMGR	0.0153	2121.93	2121.93	2.4737	2	0	TPQVAM[147]DTLAEEMDNVMGR
										VNHDIIQEGDVVEK	0.0184	1593.8	1593.81	4.54135	3	0
										KWVDNEFQPSSLSK	0.0205	1663.82	1663.83	5.16762	3	1
										SIYDGWISDSDLIGTHYR	0.0227	2096.98	2096.99	6.30287	3	0
										TPQVAMDTLAEEMDNVMGR	0.0397	2123.94	2123.95	2.79292	3	0	TPQVAMDTLAEEM[147]DNVMGR
	Q1LQS4.1	Rmet_0616	Cupriavidus metallidurans CH34	60 kDa chaperonin	57377.3	5.11332	14	42.596	596.344	GNYGYNAASGEYGDLVEMGVLDPTK	2.03e-07	2635.17	2635.21	12.8242	2	0	GNYGYNAASGEYGDLVEM[147]GVLDPTK
										GYLSPYFINNPEK	5.78e-07	1540.76	1540.76	4.59774	2	0
										SLADELEVVEGMQFDR	1.38e-06	1852.85	1852.86	4.18328	3	0	SLADELEVVEGM[147]QFDR
										SLADELEVVEGMQFDR	3.84e-06	1852.85	1852.86	4.55298	2	0	SLADELEVVEGM[147]QFDR
										ENTIIIDGAGDASAIEGR	9.88e-06	1800.89	1800.9	5.54616	2	0
										QIVLNAGEEASVVVAK	1.55e-05	1625.9	1625.91	4.4683	2	0
										AAIAGLHGENPDQNAGIK	4.36e-05	1774.9	1774.91	5.35862	3	0
										GNYGYNAASGEYGDLVEMGVLDPTK	5.1e-05	2620.19	2620.19	1.63805	2	0
										TSDNAGDGTTTATVLAQSIVR	5.99e-05	2077.03	2077.04	5.15592	3	0
										QIVLNAGEEASVVVAK	6.34e-05	1625.9	1625.91	4.64789	3	0
										MVEGVNILANAVK	8.35e-05	1372.74	1372.74	3.52434	2	0	M[147]VEGVNILANAVK
										TSDNAGDGTTTATVLAQSIVR	0.000167	2077.03	2077.05	10.6575	2	0
										SLADELEVVEGMQFDR	0.000223	1836.86	1836.86	0.553119	2	0
										IEIGKENTIIIDGAGDASAIEGR	0.000297	2341.21	2341.22	3.58276	3	1
										TSDNAGDGTTTATVLAQSIVR	0.000315	2078.04	2078.04	-0.737716	2	0
										AAIAGLHGENPDQNAGIK	0.000536	1774.9	1774.91	8.39204	2	0
										AAVEEGIVPGGGVALLR	0.0011	1606.9	1606.91	4.90073	3	0
										AMLEDIAILTGGTVIAEEIGLTLEK	0.00195	2615.4	2615.43	12.527	3	0	AM[147]LEDIAILTGGTVIAEEIGLTLEK
										QVVQLDSPFVLLFDK	0.00517	1747.96	1747.96	-0.250005	2	0
										EIAQVGAISANSDASIGER	0.0101	1887.94	1887.93	-4.42228	2	0
										FVAAGMNPMDLK	0.0188	1324.62	1324.62	4.37561	2	0	FVAAGM[147]NPM[147]DLK
										AAVEEGIVPGGGVALLR	0.0423	1606.9	1606.91	0.768559	2	0
	ABF10044.1	Rmet_3172	Cupriavidus metallidurans CH34	Nitrite reductase precursor (Cytochrome cd1) (Cytochrome oxidase) (Hydroxylamine reductase)	60768.5	8.83957	15	36.0656	540.984	DSGEVALIDGDSK	4.45e-07	1304.61	1304.62	5.24218	2	0
										LNQSVAVFDTQK	1.52e-05	1348.7	1348.71	5.81004	2	0
										LNQSVAVFDTQKLEDGYK	6.01e-05	2054.03	2054.06	11.9063	2	1
										MNNYNLQNLFSVTLR	7.68e-05	1842.92	1842.92	-0.0624011	2	0	M[147]NNYNLQNLFSVTLR
										YFLVAANASNK	0.000128	1196.62	1196.62	0.729556	2	0
										DGESALVVVDDK	0.000269	1245.61	1245.62	5.58442	2	0
										DGESALVVVDDKTR	0.000277	1502.76	1502.77	5.45131	2	1
										ILMVDYSDLK	0.000321	1211.61	1211.62	7.49746	2	0	ILM[147]VDYSDLK
										YGSPAGMPNWGTSGDLTDPEVDLMAR	0.000709	2768.21	2768.23	9.87932	3	0	YGSPAGM[147]PNWGTSGDLTDPEVDLM[147]AR
										YGSPAGMPNWGTSGDLTDPEVDLMAR	0.00119	2768.21	2768.21	2.96112	2	0	YGSPAGM[147]PNWGTSGDLTDPEVDLM[147]AR
										SHNLWVDTPLNPDAK	0.00131	1705.84	1705.84	0.857055	2	0
										SHNLWVDTPLNPDAK	0.00145	1705.84	1705.85	6.75268	3	0
										VLPIAEWANLK	0.00166	1252.72	1252.72	4.31302	2	0
										VVQAEYNQAGDEVWFSVWGTK	0.00293	2413.15	2413.15	0.873134	2	0
										EDKLAALVDVGK	0.00337	1256.7	1256.7	5.4301	2	1
										DGESALVVVDDKTR	0.00575	1502.76	1502.76	4.67075	3	1
										YIQLDPPTPPEFSLADIEK	0.00631	2173.11	2173.11	2.21572	2	0
										YGSPAGMPNWGTSGDLTDPEVDLMAR	0.00652	2753.22	2753.23	4.58264	3	0	YGSPAGM[147]PNWGTSGDLTDPEVDLMAR
										YIQLDPPTPPEFSLADIEK	0.0224	2173.11	2173.12	5.29887	3	0
										LNQSVAVFDTQKLEDGYK	0.0299	2054.03	2054.04	4.82758	3	1
										ILMVDYSDLK	0.0385	1211.61	1211.62	6.18846	2	0	ILM[147]VDYSDLK
										GMTVDNEYHPEPR	0.0466	1543.67	1543.68	5.74992	3	0
	P35908.2	-	Homo sapiens	Keratin, type II cytoskeletal 2 epidermal	65432.1	8.07353	13	31.7684	412.989	GGGFGGGSSFGGGSGFSGGGFGGGGFGGGR	5.69e-07	2398.01	2398.02	5.62299	3	0
										SISISVAGGGGGFGAAGGFGGR	6.51e-07	1837.91	1837.92	5.62814	2	0
										GGGFGGGSSFGGGSGFSGGGFGGGGFGGGR	1.29e-06	2398.01	2398.02	3.33777	2	0
										NVQDAIADAEQR	1.99e-06	1328.63	1328.64	5.23471	2	0
										MSGDLSSNVTVSVTSSTISSNVASK	5.67e-06	2473.19	2473.21	8.89865	2	0	M[147]SGDLSSNVTVSVTSSTISSNVASK
										MSGDLSSNVTVSVTSSTISSNVASK	0.000412	2457.19	2457.17	-7.32707	2	0
										DVDNAYMIK	0.000586	1083.49	1083.49	3.87636	2	0	DVDNAYM[147]IK
										VLYDAEISQIHQSVTDTNVILSMDNSR	0.00105	3047.49	3047.51	7.0632	3	0
										TSQNSELNNMQDLVEDYKK	0.00112	2271.03	2271.04	3.65561	3	1	TSQNSELNNM[147]QDLVEDYKK
										TSQNSELNNMQDLVEDYK	0.00113	2126.94	2126.96	9.91611	2	0
										NKLNDLEEALQQAK	0.00175	1612.84	1612.85	7.24373	2	1
										GFSSGSAVVSGGSR	0.00324	1253.6	1253.61	6.16863	2	0
										VDLLNQEIEFLK	0.00464	1460.8	1460.8	-3.1914	2	0
										IEISELNR	0.00924	972.524	972.53	5.6595	2	0
										TAAENDFVTLK	0.0098	1207.61	1207.62	7.40058	2	0
										TSQNSELNNMQDLVEDYK	0.0118	2142.94	2142.93	-1.33555	2	0	TSQNSELNNM[147]QDLVEDYK
										TSQNSELNNMQDLVEDYKK	0.0305	2255.04	2255.05	4.28862	3	1
	ABF12494.1	Rmet_5635	Cupriavidus metallidurans CH34	penicillin amidase (peptidase S45) (plasmid)	90378.2	8.48458	14	27.5862	386.207	AAWLDLGMAPYFGSMDYMR	3.13e-07	2242.96	2242.97	5.09104	2	0	AAWLDLGM[147]APYFGSM[147]DYM[147]R
										NNDFQLTAGASFR	4.62e-06	1439.68	1439.69	4.80107	2	0
										SSVEDSMAWQNDTVSLPAQR	5.55e-06	2236.01	2236.02	4.07423	2	0	SSVEDSM[147]AWQNDTVSLPAQR
										QQFDVNAGPIGGSSFTPMNTSYR	5.88e-06	2491.14	2491.14	-0.813281	2	0	QQFDVNAGPIGGSSFTPM[147]NTSYR
										LGVGYEWAESSR	7.24e-06	1352.64	1352.64	5.14551	2	0
										ADSAPAALFEVWFSK	1.79e-05	1637.81	1637.82	4.0835	2	0
										SSVEDSMAWQNDTVSLPAQR	5.14e-05	2220.01	2220.02	4.55538	2	0
										WGAPGENQVYADR	8.96e-05	1461.66	1461.67	4.57903	2	0
										GEYFPLLYSR	0.000123	1243.62	1243.63	7.67917	2	0
										ADSAPAALFEVWFSK	0.000123	1639.82	1639.82	-2.09291	3	0
										MVVDVGNWDASR	0.000146	1348.63	1348.64	5.24754	2	0
										FYMDQEDLYAYETDPAQPHEYK	0.000245	2768.16	2768.17	2.9619	3	0	FYM[147]DQEDLYAYETDPAQPHEYK
										GEYFPLLYSR	0.000295	1243.62	1243.63	4.44025	2	0
										WEPMETVTEQISVR	0.000634	1719.81	1719.83	9.03993	2	0	WEPM[147]ETVTEQISVR
										MVVDVGNWDASR	0.000896	1363.62	1363.63	4.44479	2	0	M[147]VVDVGNWDASR
										FYMDQEDLYAYETDPAQPHEYK	0.0019	2753.17	2753.18	2.54906	3	0
										AAWLDLGMAPYFGSMDYMR	0.00447	2244.98	2244.98	3.48734	3	0	AAWLDLGM[147]APYFGSM[147]DYM[147]R
										MVVDVGNWDASR	0.00498	1363.62	1363.63	5.5184	2	0	M[147]VVDVGNWDASR
										NMDELPWAFNPAPGFVVTANENTIPPNHPAAK	0.0169	3475.67	3475.67	-1.74268	4	0	NM[147]DELPWAFNPAPGFVVTANENTIPPNHPAAK
										GRWEPMETVTEQISVR	0.0194	1932.94	1932.94	3.03942	3	1	GRWEPM[147]ETVTEQISVR
										MVTLLKPLASSDAQIQR	0.0227	1886.03	1886.05	9.51258	2	0	M[147]VTLLKPLASSDAQIQR
										MVTLLKPLASSDAQIQR	0.0237	1886.03	1886.04	5.13672	3	0	M[147]VTLLKPLASSDAQIQR
	P04264.6	-	Homo sapiens	Keratin, type II cytoskeletal 1	66037.9	8.15059	14	22.8261	319.565	QISNLQQSISDAEQR	2.27e-06	1715.84	1715.85	5.76509	2	0
										TNAENEFVTIK	2.34e-05	1264.63	1264.64	4.187	2	0
										FLEQQNQVLQTKWELLQQVDTSTR	3.65e-05	2932.52	2932.51	-1.57135	3	1
										SLNNQFASFIDK	6.08e-05	1382.68	1382.69	5.42062	2	0
										NMQDMVEDYR	0.000145	1315.52	1315.52	5.78024	2	0	NMQDM[147]VEDYR
										YEELQITAGR	0.000171	1178.59	1178.6	5.76705	2	0
										LNDLEDALQQAK	0.000284	1357.7	1357.7	6.07942	2	0
										SLDLDSIIAEVK	0.000389	1301.71	1301.72	6.01057	2	0
										LALDLEIATYR	0.000472	1277.71	1277.71	0.414804	2	0
										QISNLQQSISDAEQR	0.00216	1715.84	1715.85	4.65485	3	0
										SGGGFSSGSAGIINYQR	0.00324	1656.79	1656.79	4.57995	2	0
										NMQDMVEDYR	0.0033	1316.53	1316.52	-3.95055	2	0	NMQDM[147]VEDYR
										NMQDMVEDYR	0.00492	1315.52	1315.52	3.64571	2	0	NMQDM[147]VEDYR
										QISNLQQSISDAEQR	0.00976	1716.85	1716.85	0.00990185	2	0
										TNAENEFVTIKK	0.0157	1392.72	1392.73	5.70464	3	1
										KQISNLQQSISDAEQR	0.0239	1843.94	1843.95	6.38796	3	1
										LNDLEDALQQAKEDLAR	0.0288	1940.98	1940.99	7.46994	3	1
										LDSELKNMQDMVEDYR	0.0311	2016.88	2016.89	6.73021	3	1	LDSELKNM[147]QDM[147]VEDYR
	P13645.6	-	Homo sapiens	Keratin, type I cytoskeletal 10	58826.4	5.13429	11	24.1438	265.582	NVSTGDVNVEMNAAPGVDLTQLLNNMR	3.42e-06	2903.38	2903.4	8.48426	3	0	NVSTGDVNVEM[147]NAAPGVDLTQLLNNM[147]R
										ALEESNYELEGK	5e-06	1380.64	1380.65	5.09401	2	0
										SKELTTEIDNNIEQISSYK	8.26e-06	2211.09	2211.11	7.39725	2	1
										GSLGGGFSSGGFSGGSFSR	1.8e-05	1706.76	1706.78	6.86855	2	0
										NQILNLTTDNANILLQIDNAR	5.01e-05	2367.26	2367.27	1.34839	3	0
										NQILNLTTDNANILLQIDNAR	8.74e-05	2367.26	2367.28	5.19545	2	0
										ELTTEIDNNIEQISSYK	0.000201	1996.97	1996.97	-3.03109	2	0
										VLDELTLTK	0.000206	1030.59	1030.6	4.63035	2	0
										SKELTTEIDNNIEQISSYK	0.000421	2211.09	2211.1	6.42534	3	1
										QSLEASLAETEGR	0.000585	1389.67	1389.69	8.23575	2	0
										IRLENEIQTYR	0.000626	1433.76	1433.77	4.59211	2	1
										NVSTGDVNVEMNAAPGVDLTQLLNNMR	0.00291	2888.39	2888.42	9.95746	3	0	NVSTGDVNVEM[147]NAAPGVDLTQLLNNMR
										ELTTEIDNNIEQISSYK	0.012	1996.97	1996.97	-2.84781	2	0
										LKYENEVALR	0.0135	1233.67	1233.68	5.5963	3	1
										LKYENEVALR	0.0179	1233.67	1233.68	5.23559	2	1
										NVSTGDVNVEMNAAPGVDLTQLLNNMR	0.0271	2905.39	2905.4	1.70579	2	0	NVSTGDVNVEM[147]NAAPGVDLTQLLNNM[147]R
										LENEIQTYR	0.0495	1164.58	1164.58	1.76974	2	0
	ABF10106.1	Rmet_3234	Cupriavidus metallidurans CH34	outer membrane protein (porin)	41949.2	8.9723	5	32.9177	164.589	NTGADPWSFVVSTDYAFSK	1.27e-05	2090.96	2090.96	2.3616	2	0
										GVFVLESGFNVDTGTSGQNNR	1.77e-05	2198.05	2198.06	6.29877	2	0
										DGSTLGTSSASPGSLGGSGFGTTLGSYNQFGAMVGLR	7.59e-05	3511.65	3511.66	0.837213	3	0	DGSTLGTSSASPGSLGGSGFGTTLGSYNQFGAM[147]VGLR
										YAHAQGGAVLPGGVNTVDGAAK	0.000834	2052.04	2052.05	5.49648	3	0
										GVFVLESGFNVDTGTSGQNNR	0.00137	2198.05	2198.06	5.09862	3	0
										EMSASVMYNGGPFSVGAIYDETNVGIAAADGAK	0.00609	3325.51	3325.53	6.29708	3	0	EM[147]SASVM[147]YNGGPFSVGAIYDETNVGIAAADGAK
										YAHAQGGAVLPGGVNTVDGAAK	0.00747	2053.05	2053.07	11.0952	2	0
	P35527.3	-	Homo sapiens	Keratin, type I cytoskeletal 9	62063.6	5.13619	6	23.9165	143.499	VQALEEANNDLENK	3.6e-05	1585.76	1585.77	8.7857	2	0
										GGSGGSHGGGSGFGGESGGSYGGGEEASGSGGGYGGGSGK	0.000562	3223.28	3223.3	6.29545	3	0
										GGGGSFGYSYGGGSGGGFSASSLGGGFGGGSR	0.000702	2704.15	2704.17	4.55743	3	0
										QGVDADINGLR	0.00382	1156.58	1156.59	4.91015	2	0
										EIETYHNLLEGGQEDFESSGAGK	0.00418	2511.14	2511.14	-0.0951759	3	0
										GGGGSFGYSYGGGSGGGFSASSLGGGFGGGSR	0.00531	2705.16	2705.18	5.08398	2	0
										DIENQYETQITQIEHEVSSSGQEVQSSAK	0.0115	3264.51	3264.53	5.02188	3	0
	ABF09250.1	Rmet_2373	Cupriavidus metallidurans CH34	conserved hypothetical protein	59637.5	8.00974	6	17.8058	106.835	LASYDGYGSCPLTVER	3.05e-05	1786.82	1786.83	4.89305	2	0	LASYDGYGSC[160]PLTVER
										IVLAEFAYGGK	4.87e-05	1166.63	1166.64	3.83582	2	0
										YANVFALGDCTNTTNAK	0.000392	1858.85	1858.86	3.64472	2	0	YANVFALGDC[160]TNTTNAK
										YQQLVVCPGLK	0.000414	1303.7	1303.7	5.84646	2	0	YQQLVVC[160]PGLK
										VTDQQAQAFGTLMTQLPGPVFAYCR	0.00337	2816.36	2816.37	2.16769	3	0	VTDQQAQAFGTLM[147]TQLPGPVFAYC[160]R
										VSPLADAAGWVDVDPSSLR	0.0135	1953.98	1953.99	5.61316	2	0
	ABF10267.1	Rmet_3395	Cupriavidus metallidurans CH34	conserved hypothetical protein	46557.4	8.80527	5	21.0648	105.324	FDGFCIVSSDSDFTR	7.9e-06	1751.75	1751.76	5.34667	2	0	FDGFC[160]IVSSDSDFTR
										LSELVTATNLFEVETR	5.7e-05	1820.95	1820.96	6.97492	2	0
										NATDSAMIIDAMDLLYTGR	0.000337	2102.97	2102.99	8.21931	2	0	NATDSAM[147]IIDAM[147]DLLYTGR
										VTEEEDDDAAGSASTLIQEAVEVSTERPK	0.000511	3076.44	3076.45	2.22952	3	0
										EQGLTVYGFGER	0.0112	1354.65	1354.65	-3.17129	2	0
	P00761.1	-	Sus Scrofa	Trypsin	24409.2	6.99753	4	25.1082	100.433	LGEHNIDVLEGNEQFINAAK	5.09e-08	2210.1	2210.11	5.93775	3	0
										LGEHNIDVLEGNEQFINAAK	2.57e-07	2210.1	2210.11	6.51781	3	0
										LGEHNIDVLEGNEQFINAAK	1.11e-05	2210.1	2210.1	3.61839	3	0
										LGEHNIDVLEGNEQFINAAK	1.32e-05	2210.1	2210.11	5.35814	3	0
										LGEHNIDVLEGNEQFINAAK	1.58e-05	2210.1	2210.11	6.18661	3	0
										LGEHNIDVLEGNEQFINAAK	2.56e-05	2210.1	2210.11	7.07616	2	0
										LGEHNIDVLEGNEQFINAAK	2.56e-05	2210.1	2210.11	6.76667	3	0
										LGEHNIDVLEGNEQFINAAK	3.61e-05	2210.1	2210.11	5.52962	2	0
										IITHPNFNGNTLDNDIMLIK	0.000222	2282.17	2282.19	6.16474	3	0
										LGEHNIDVLEGNEQFINAAK	0.000885	2210.1	2210.11	4.28081	3	0
										LGEHNIDVLEGNEQFINAAK	0.000999	2210.1	2210.11	4.94367	3	0
										IITHPNFNGNTLDNDIMLIK	0.00117	2298.17	2298.18	4.88824	3	0	IITHPNFNGNTLDNDIM[147]LIK
										LSSPATLNSR	0.0125	1044.56	1044.56	5.13902	2	0
										LGEHNIDVLEGNEQFINAAK	0.0136	2211.1	2211.1	-3.58237	3	0
										LGEHNIDVLEGNEQFINAAK	0.0141	2211.1	2211.1	0.0122111	2	0
										VATVSLPR	0.0155	841.502	841.507	5.8253	2	0
										VATVSLPR	0.016	841.502	841.507	5.38917	2	0
										IITHPNFNGNTLDNDIMLIK	0.02	2299.18	2299.17	-2.19644	3	0	IITHPNFNGNTLDNDIM[147]LIK
										IITHPNFNGNTLDNDIMLIK	0.0279	2283.18	2283.17	-3.61645	3	0
										LGEHNIDVLEGNEQFINAAK	0.0312	2210.1	2210.07	-12.6972	2	0
	ABF10864.1	Rmet_3996	Cupriavidus metallidurans CH34	periplasmic glucan biosynthesis protein (plasmid)	59854.6	8.6331	6	16.2313	97.3881	VVFYALLDSK	8.82e-06	1153.64	1153.64	4.62797	2	0
										GLAINTGLSEPEEFPAFR	7.98e-05	1948.99	1948.99	-2.14932	2	0
										HVALSTFAVNNPR	0.000211	1424.75	1424.76	4.65905	3	0
										LDEVMSVLGASYFR	0.00107	1601.78	1601.79	7.03969	2	0	LDEVM[147]SVLGASYFR
										VGIAPLTSMFLFGPNQQR	0.00583	1991.03	1991.03	0.504262	2	0	VGIAPLTSM[147]FLFGPNQQR
										VGIAPLTSMFLFGPNQQR	0.00898	1991.03	1991.04	5.34095	3	0	VGIAPLTSM[147]FLFGPNQQR
										LDHLAWNDQGTPFR	0.0167	1668.8	1668.81	5.82095	3	0
	ABF07819.1	Rmet_0933	Cupriavidus metallidurans CH34	NADH dehydrogenase chain G	83735.8	6.00099	7	13.4177	93.9241	GVTAPAGTEGFDGGDAAK	8.98e-06	1620.75	1620.76	4.47694	2	0
										INAAPSGWTAALAGVAR	1.52e-05	1624.87	1624.88	6.28912	2	0
										FGQEVAGVMELGMLGR	3.29e-05	1724.82	1724.83	1.87382	2	0	FGQEVAGVM[147]ELGM[147]LGR
										KVEVAEGSLVMEAAQK	7.39e-05	1703.88	1703.88	3.43393	3	1	KVEVAEGSLVM[147]EAAQK
										VAVIGAGGEDLLMPVAAR	0.000139	1753.94	1753.95	5.72369	2	0	VAVIGAGGEDLLM[147]PVAAR
										GLGSDNVDFR	0.000166	1078.5	1078.51	3.08483	2	0
										VAVIGAGGEDLLMPVAAR	0.00123	1737.94	1737.96	6.49445	2	0
										FAYEGLNSADR	0.00213	1241.57	1241.57	3.97804	2	0
	ABF07854.1	Rmet_0968	Cupriavidus metallidurans CH34	Acyl-CoA dehydrogenase (ACAD)	47061.8	7.17165	5	16.9048	84.5238	VPVSNILLGEGR	1.02e-05	1252.71	1252.72	4.50382	2	0
										SAFLMTEPAVASSDATNIECR	2.73e-05	2285.03	2285.05	7.90011	2	0	SAFLM[147]TEPAVASSDATNIEC[160]R
										FYAEIQANR	0.00144	1110.55	1110.55	6.54273	2	0
										SAFLMTEPAVASSDATNIECR	0.00805	2286.04	2286.04	2.50302	3	0	SAFLM[147]TEPAVASSDATNIEC[160]R
										RAPEGLSNLEYAPMCEIMGR	0.0188	2326.06	2326.07	2.73122	3	1	RAPEGLSNLEYAPM[147]C[160]EIM[147]GR
										VVAPNVALR	0.0199	937.571	937.575	4.55219	2	0
	ABF10426.1	Rmet_3554	Cupriavidus metallidurans CH34	FAD-dependent pyridine nucleotide-disulphide oxidoreductase	52522.5	9.75651	5	15.4158	77.0791	LSGADEVVVGNEIIR	0.000107	1569.84	1569.85	6.16943	2	0
										ADVTMLSQANGATEVCYTQQNNPGR	0.000771	2742.23	2742.24	3.17807	3	0	ADVTM[147]LSQANGATEVC[160]YTQQNNPGR
										FGGVAQPSVFK	0.00116	1135.6	1135.61	6.48466	2	0
										TTMPLHPTVAEELFG	0.00227	1657.8	1657.81	5.05247	2	0	TTM[147]PLHPTVAEELFG
										AQAVLAAIGR	0.00448	968.577	968.581	4.328	2	0
	ABF08929.1	Rmet_2050	Cupriavidus metallidurans CH34	2-oxoglutarate decarboxylase, thiamin-requiring (E1 component)	106096	6.26519	7	10.4211	72.9474	GHFETVIPDHEELNASK	0.000379	1922.92	1922.94	5.7553	3	0
										LGHNEQDTPAMTQPLMYK	0.00142	2104.96	2104.97	4.76637	3	0	LGHNEQDTPAM[147]TQPLM[147]YK
										HTVDPVLSNFK	0.00272	1255.66	1255.67	7.98308	2	0
										MEQLYPFPHK	0.00607	1304.62	1304.63	4.55304	2	0	M[147]EQLYPFPHK
										ALLDAAFSK	0.00995	934.512	934.516	3.37502	2	0
										LGYAGRPASASPAVGYYAK	0.0317	1898.98	1898.98	1.48606	3	0
										WTDAADTAVPMTELK	0.042	1663.78	1663.79	11.0892	2	0	WTDAADTAVPM[147]TELK
										HTVDPVLSNFK	0.0431	1256.66	1256.66	-2.11592	2	0
	ABF06891.1	Rmet_0005	Cupriavidus metallidurans CH34	Putative metal-dependent amidohydrolase (TAT secreted)	63442.2	7.71637	4	8.90411	35.6164	AQALDPSLMPGAPVTR	5.8e-05	1638.84	1638.85	3.35908	2	0	AQALDPSLM[147]PGAPVTR
										AQFYAPCASALR	0.000111	1353.65	1353.65	2.19555	2	0	AQFYAPC[160]ASALR
										GPDTQTIDLGGR	0.000502	1228.6	1228.61	4.21535	2	0
										LEEGPAYGPFLK	0.00971	1319.68	1319.68	5.15505	2	0
	ABF07045.1	Rmet_0159	Cupriavidus metallidurans CH34	choline dehydrogenase, a flavoprotein	60275.4	7.35586	3	10.1786	30.5357	VVDASIMPTLIGGDANAPAIMIGER	0.00152	2543.28	2543.3	5.99618	3	0	VVDASIM[147]PTLIGGDANAPAIM[147]IGER
										SGMLTSNLAEAGAFVR	0.00372	1639.81	1639.81	1.28612	2	0	SGM[147]LTSNLAEAGAFVR
										ILAQAPLAAFGGQDLR	0.00779	1640.91	1640.9	-5.02282	2	0
	Q1LI20.1	Rmet_3334	Cupriavidus metallidurans CH34	DNA-directed RNA polymerase subunit beta	152495	5.57048	5	5.99415	29.9708	DIQTLYTNDLDQGPYISQTLR	1.16e-05	2453.21	2453.23	7.63164	3	0
										CVGELAENQFR	2.66e-05	1321.61	1321.61	3.97849	2	0	C[160]VGELAENQFR
										NIIDPDTGEVIANANDELTETLLENLR	0.00135	2982.49	2982.52	11.4616	3	0
										DIQTLYTNDLDQGPYISQTLR	0.00146	2454.22	2454.21	-0.816554	2	0
										LFYSEESYDLSR	0.00174	1507.68	1507.69	5.9031	2	0
										GSWLDFEFDPK	0.00455	1339.61	1339.61	4.11986	2	0
	Q04695.2	-	Homo sapiens	Keratin, type I cytoskeletal 17	48105.1	4.97159	3	9.72222	29.1667	DAEDWFFSK	4.09e-05	1143.49	1143.5	6.9288	2	0
										GQVGGEINVEMDAAPGVDLSR	0.00083	2129.01	2129.02	4.85015	2	0	GQVGGEINVEM[147]DAAPGVDLSR
										GQVGGEINVEMDAAPGVDLSR	0.00417	2114.02	2114.03	5.82682	2	0
										ALEEANTELEVK	0.0377	1344.68	1344.68	5.13283	2	0
	P02533.4	-	Homo sapiens	Keratin, type I cytoskeletal 14	51560.9	5.08769	3	9.5339	28.6017	APSTYGGGLSVSSSR	2.68e-06	1424.69	1424.69	2.81114	2	0
										GQVGGDVNVEMDAAPGVDLSR	3.15e-06	2084.98	2085	7.56602	2	0
										GQVGGDVNVEMDAAPGVDLSR	0.00183	2100.97	2101	12.26	2	0	GQVGGDVNVEM[147]DAAPGVDLSR
										DAEEWFFTK	0.00534	1172.53	1172.53	0.686552	2	0
	ABF09369.1	Rmet_2492	Cupriavidus metallidurans CH34	aconitate hydratase 1	97943.8	6.58351	4	6.99223	27.9689	YIAEGTPTVVFGGEEYGTGSSR	2.49e-05	2277.07	2277.07	-0.656107	2	0
										GQVYDWPK	0.00201	991.476	991.48	3.96177	2	0
										VEGGITLHQPTGEELSIYDAAMK	0.0297	2459.21	2459.22	4.24363	3	0
										AAGLLPYLDK	0.0477	1059.6	1059.6	3.99586	2	0
	ABF08911.1	Rmet_2032	Cupriavidus metallidurans CH34	transcription termination/antitermination L factor	55053.6	4.57637	3	9.16497	27.4949	SLDGLTPELIGK	0.000454	1241.69	1241.69	4.93442	2	0
										DALLTMELAR	0.00302	1147.59	1147.6	5.29806	2	0	DALLTM[147]ELAR
										DDLAELAVDELVELAGVGEEEAK	0.0218	2414.18	2414.2	6.97006	3	0
	ABF10060.1	Rmet_3188	Cupriavidus metallidurans CH34	unassigned peptidase, M61 subfamily (glycyl aminopeptidase)	66523.9	7.19105	3	9.10596	27.3179	QDENAPNAIVSYYTK	0.000116	1712.81	1712.82	5.03324	2	0
										TGLVTDQQYVEMLGK	0.000607	1696.83	1696.85	6.99538	2	0	TGLVTDQQYVEM[147]LGK
										VVGQDDGPCSVDIHAPAGEAYADWR	0.0306	2685.2	2685.21	3.52674	3	0	VVGQDDGPC[160]SVDIHAPAGEAYADWR
	ABF08849.1	Rmet_1970	Cupriavidus metallidurans CH34	PhoH family protein	61795	7.74155	3	8.68794	26.0638	VALLETGDTNAPATAR	0.00648	1598.83	1598.83	4.42199	2	0
										ATVPVGEDIGFLPGTEEEK	0.0263	1987.99	1987.99	2.83503	2	0
										LNDIKLPEGLPQGK	0.0432	1520.86	1520.86	5.70534	3	1
	ABF07136.1	Rmet_0250	Cupriavidus metallidurans CH34	C-terminal processing peptidase	58471.9	9.00671	3	7.28972	21.8692	FAGLGIEISQEEGLVK	0.00414	1688.9	1688.91	9.34218	2	0
										VTLTIYR	0.015	864.507	864.512	5.32789	2	0
										GSVQTVRPLTNDTGIK	0.02	1684.91	1684.92	7.35529	2	0
	ABF09357.1	Rmet_2480	Cupriavidus metallidurans CH34	leucine/isoleucine/valine transporter subunit, periplasmic-binding component of ABC superfamily	39314.5	8.74394	2	10.9333	21.8667	IPVAVFEGINAGDSDYSAVITK	0.0128	2266.16	2266.15	-2.88197	2	0
										TIGRDDQQGPAAAQYIINK	0.0239	2058.05	2058.06	6.219	3	1
	P13647.3	-	Homo sapiens	Keratin, type II cytoskeletal 5	62377.6	7.58353	3	6.27119	18.8136	VDALMDEINFMK	4.11e-05	1456.66	1456.66	2.79132	2	0	VDALM[147]DEINFM[147]K
										ISISTSGGSFR	0.00102	1110.57	1110.57	6.09328	2	0
										SFSTASAITPSVSR	0.0202	1409.72	1409.72	4.59171	2	0
	P04259.5	-	Homo sapiens	Keratin, type II cytoskeletal 6B	60066.2	8.09057	3	5.67376	17.0213	SGFSSISVSR	0.00632	1025.51	1025.52	5.67423	2	0
										ADTLTDEINFLR	0.00822	1406.7	1406.71	3.49825	2	0
										WTLLQEQGTK	0.0402	1202.63	1202.63	3.81747	2	0
	ABF09787.1	Rmet_2914	Cupriavidus metallidurans CH34	poly(A) polymerase I polynucleotide adenylyltransferase	59270.7	9.97054	2	7.56144	15.1229	GGQGGQGGQSGANEPEAGEGVEGAEGDAPAR	0.000916	2796.21	2796.22	5.13839	3	0
										AGYDFLQLR	0.0277	1081.56	1081.56	0.220053	2	0
	P48668.3		Homo sapiens	Keratin, type II cytoskeletal 6C	60024.2	8.09057	2	6.38298	12.766	YEELQVTAGR	0.00746	1164.58	1164.59	13.4049	2	0
										AIGGGLSSVGGGSSTIKYTTTSSSSR	0.00965	2418.21	2418.22	4.11089	3	1
	ABF11440.1	Rmet_4578	Cupriavidus metallidurans CH34	ABC-type dipeptide/oligopeptide/nickel transport system, substrate binding protein (plasmid)	65158.7	9.17001	2	6.26087	12.5217	ELTSEDVLFSYGR	2.24e-05	1514.73	1514.74	11.9447	2	0
										NVTGTGPFTLNQFTQGNSTTYVK	0.0292	2475.22	2475.22	2.92177	3	0
	P19012.3	-	Homo sapiens	Keratin, type I cytoskeletal 15	49211.2	4.71008	2	5.04386	10.0877	ALEEANADLEVK	2.06e-05	1300.65	1300.66	3.12459	2	0
										TRLEQEIATYR	0.000695	1379.73	1379.74	4.93068	2	1
	ABF11752.1	Rmet_4890	Cupriavidus metallidurans CH34	conserved hypothetical protein (plasmid)	62208.4	6.85616	2	4.4905	8.981	VFEVTLPGTGK	0.00833	1146.63	1146.63	4.39811	2	0
										ISGGDLAAVAAGLEK	0.0143	1370.74	1370.76	13.4686	2	0
593	ABF09108.1	Rmet_2229	Cupriavidus metallidurans CH34	ABC-type sugar transporter, periplasmic component, probable sugar binding precursor	64792.8	8.48233	28	61.8966	1733.1	TPQVAMDTLAEEMDNVMGR	3.08e-10	2154.92	2154.93	4.79553	2	0	TPQVAM[147]DTLAEEM[147]DNVM[147]GR
										QGMQNGYQDVGSWTFFK	8.62e-09	1991.88	1991.85	-18.241	2	0
										TPQVAMDTLAEEMDNVMGR	1.28e-08	2139.94	2139.94	0.170099	2	0	TPQVAM[147]DTLAEEMDNVM[147]GR
										FTDAWLSMAGSADK	6.99e-08	1514.67	1514.68	4.58449	2	0	FTDAWLSM[147]AGSADK
										TPQVAMDTLAEEMDNVMGR	1.2e-07	2106.94	2106.94	2.74142	2	0
										QGMQNGYQDVGSWTFFK	1.66e-07	1991.88	1991.85	-16.5251	2	0
										GVTQINVVSETITTHEYESK	1.85e-07	2234.11	2234.12	4.53783	2	0
										FTDAWLSMAGSADK	7.1e-07	1498.68	1498.69	6.03599	2	0
										LYQLPDQQFANLYWFR	7.48e-07	2101.04	2101.05	5.31689	2	0
										LAAAWLYAQFVTSK	1.31e-06	1567.84	1567.84	2.14945	2	0
										YGAILPLSDYMTGVGK	1.57e-06	1699.85	1699.86	4.09389	2	0	YGAILPLSDYM[147]TGVGK
										SIYDGWISDSDLIGTHYR	2.12e-06	2096.98	2096.99	6.62953	2	0
										FTDAWLSMAGSADK	3.74e-06	1514.67	1514.67	2.00572	2	0	FTDAWLSM[147]AGSADK
										WVDNEFQPSSLSK	4.07e-06	1535.73	1535.73	3.53579	2	0
										LYQLPDQQFANLYWFR	5.13e-06	2101.04	2101.05	5.42683	3	0
										NADKYGGLIEFYR	6.81e-06	1544.76	1544.76	1.47531	2	1
										LAAAWLYAQFVTSK	7.22e-06	1567.84	1567.85	4.74921	3	0
										YGAILPLSDYMTGVGK	7.47e-06	1683.85	1683.86	6.39604	2	0
										KWVDNEFQPSSLSK	7.97e-06	1663.82	1663.83	3.34111	2	1
										QGMQNGYQDVGSWTFFK	9.08e-06	1991.88	1991.9	6.64045	2	0
										GLPVVNADGSPK	1.14e-05	1152.61	1152.62	4.2165	2	0
										VNHDIIQEGDVVEK	2.78e-05	1593.8	1593.81	3.86059	2	0
										TPQVAMDTLAEEMDNVMGR	3.39e-05	2138.93	2138.95	10.1738	3	0	TPQVAM[147]DTLAEEMDNVM[147]GR
										LAAAWLYAQFVTSK	3.68e-05	1567.84	1567.85	5.57519	2	0
										QGMQNGYQDVGSWTFFK	4.32e-05	2007.88	2007.89	4.46989	3	0	QGM[147]QNGYQDVGSWTFFK
										TPQVAMDTLAEEMDNVMGR	4.66e-05	2154.92	2154.93	4.87442	3	0	TPQVAM[147]DTLAEEM[147]DNVM[147]GR
										QGMQNGYQDVGSWTFFK	4.75e-05	2007.88	2007.89	6.33106	2	0	QGM[147]QNGYQDVGSWTFFK
										GGATNSPAAVYALTK	5.12e-05	1419.74	1419.74	5.25872	2	0
										TPQVAMDTLAEEMDNVMGR	5.99e-05	2122.93	2122.95	7.7685	2	0	TPQVAM[147]DTLAEEMDNVMGR
										GLPNGMPVDEWGIR	0.000103	1555.75	1555.75	3.94666	2	0	GLPNGM[147]PVDEWGIR
										QGMQNGYQDVGSWTFFK	0.000116	1990.88	1990.86	-6.29974	2	0
										FTDAWLSMAGSADK	0.000152	1514.67	1514.67	1.1996	2	0	FTDAWLSM[147]AGSADK
										TPQVAMDTLAEEMDNVMGR	0.000189	2122.93	2122.95	7.61823	3	0	TPQVAM[147]DTLAEEMDNVMGR
										GVTQINVVSETITTHEYESK	0.000244	2234.11	2234.11	3.49357	3	0
										YAPPQAMGMTFSEAGPVPAQGQVAQQIFWYTAFTADMTK	0.000328	4283.96	4283.99	5.89501	4	0	YAPPQAM[147]GM[147]TFSEAGPVPAQGQVAQQIFWYTAFTADM[147]TK
										WLSSEHAPWK	0.000399	1239.6	1239.61	3.01548	2	0
										SIYDGWISDSDLIGTHYR	0.000419	2096.98	2096.99	4.29475	3	0
										KGLPVVNADGSPK	0.000476	1280.71	1280.72	5.32596	2	1
										SLTGLTFIR	0.000544	1006.58	1006.59	5.23356	2	0
										KGLPVVNADGSPK	0.000588	1280.71	1280.72	5.98262	3	1
										EYTNPGIDIKDFIGTK	0.000602	1809.91	1809.92	5.40136	2	1
										VAWTPTGNNVPDYPK	0.000859	1657.81	1657.82	5.89754	2	0
										MAPSPYGPYWK	0.000871	1311.6	1311.6	3.3646	2	0	M[147]APSPYGPYWK
										YGYDLGVPTNWSAYEDIANFFTNDVK	0.00101	2998.37	2998.39	7.39069	2	0
										LAAAWLYAQFVTSK	0.0014	1567.84	1567.84	0.592535	2	0
										SIYDGWISDSDLIGTHYR	0.00141	2096.98	2096.99	6.47789	3	0
										YGAILPLSDYMTGVGK	0.00143	1699.85	1699.85	-1.79487	2	0	YGAILPLSDYM[147]TGVGK
										AFEEITGIK	0.00336	1006.53	1006.54	5.48814	2	0
										YGGLIEFYR	0.00457	1116.56	1116.57	6.45285	2	0
										TPQVAMDTLAEEMDNVMGR	0.00458	2138.93	2138.96	14.8883	2	0	TPQVAM[147]DTLAEEM[147]DNVMGR
										EYTNPGIDIK	0.00499	1148.57	1148.58	3.95883	2	0
										TPQVAMDTLAEEMDNVMGR	0.00526	2138.93	2138.93	2.29835	3	0	TPQVAMDTLAEEM[147]DNVM[147]GR
										VNHDIIQEGDVVEK	0.00612	1593.8	1593.81	4.65617	3	0
										YAPPQAMGMTFSEAGPVPAQGQVAQQIFWYTAFTADMTKK	0.00739	4397.07	4397.09	4.19939	4	1	YAPPQAMGM[147]TFSEAGPVPAQGQVAQQIFWYTAFTADM[147]TKK
										TPQVAMDTLAEEMDNVMGR	0.00773	2139.94	2139.94	2.13184	3	0	TPQVAM[147]DTLAEEM[147]DNVMGR
										TPQVAMDTLAEEMDNVMGR	0.00785	2154.92	2154.92	-0.393982	3	0	TPQVAM[147]DTLAEEM[147]DNVM[147]GR
										TPQVAMDTLAEEMDNVMGR	0.00981	2106.94	2106.94	3.02477	3	0
										YGAILPLSDYMTGVGK	0.00999	1699.85	1699.85	2.58552	2	0	YGAILPLSDYM[147]TGVGK
										YGAILPLSDYMTGVGK	0.0103	1698.84	1698.83	-5.39603	2	0	YGAILPLSDYM[147]TGVGK
										YGYDLGVPTNWSAYEDIANFFTNDVK	0.0241	2999.37	2999.39	6.59438	3	0
										VNHDIIQEGDVVEK	0.0259	1593.8	1593.81	7.64337	3	0
										LAQLWWK	0.0286	943.528	943.532	4.22139	2	0
										AFEEITGIK	0.0299	1006.53	1006.54	5.60935	2	0
										LAQLWWK	0.0337	943.528	943.533	5.06185	2	0
										SLTGLTFIR	0.0382	1006.58	1006.59	4.44574	2	0
										YAPPQAMGMTFSEAGPVPAQGQVAQQIFWYTAFTADMTK	0.0398	4284.97	4285.03	12.8365	3	0	YAPPQAM[147]GM[147]TFSEAGPVPAQGQVAQQIFWYTAFTADM[147]TK
										WLSSEHAPWK	0.0461	1239.6	1239.61	5.83654	3	0
	P35527.3	-	Homo sapiens	Keratin, type I cytoskeletal 9	62063.6	5.13619	28	61.4767	1721.35	GFGGASGGGYSSSGGFGGGFGGGSGGGFGGGYGSGFGGFGGFGGGAGGGDGGILTANEK	5.76e-19	4861.07	4861.1	6.39262	4	0
										GFGGASGGGYSSSGGFGGGFGGGSGGGFGGGYGSGFGGFGGFGGGAGGGDGGILTANEK	1.31e-09	4862.08	4862.11	6.2934	4	0
										GFGGASGGGYSSSGGFGGGFGGGSGGGFGGGYGSGFGGFGGFGGGAGGGDGGILTANEK	2.67e-09	4862.08	4862.1	3.49665	3	0
										GGSGGSHGGGSGFGGESGGSYGGGEEASGSGGGYGGGSGK	4.28e-09	3222.27	3222.3	6.63444	3	0
										GGSGGSHGGGSGFGGESGGSYGGGEEASGSGGGYGGGSGK	7.63e-09	3222.27	3222.3	8.22556	3	0
										GGGGSFGYSYGGGSGGGFSASSLGGGFGGGSR	4.95e-08	2704.15	2704.18	7.8801	2	0
										SDLEMQYETLQEELMALK	7.16e-08	2186.01	2186.03	7.16144	2	0	SDLEM[147]QYETLQEELMALK
										DIENQYETQITQIEHEVSSSGQEVQSSAK	1.78e-07	3263.51	3263.53	5.80511	3	0
										EEMSQLTGQNSGDVNVEINVAPGK	5.55e-07	2532.19	2532.21	7.25894	2	0	EEM[147]SQLTGQNSGDVNVEINVAPGK
										DIENQYETQITQIEHEVSSSGQEVQSSAK	1.02e-06	3264.51	3264.52	1.31995	3	0
										GGGGSFGYSYGGGSGGGFSASSLGGGFGGGSR	1.17e-06	2704.15	2704.17	7.53692	3	0
										EIETYHNLLEGGQEDFESSGAGK	1.48e-06	2509.12	2509.14	4.2732	3	0
										VQALEEANNDLENKIQDWYDKK	1.58e-06	2662.29	2662.3	4.1577	3	2
										EIETYHNLLEGGQEDFESSGAGK	2e-06	2509.12	2509.14	5.36801	3	0
										NHKEEMSQLTGQNSGDVNVEINVAPGK	2.05e-06	2895.39	2895.4	3.94109	3	1
										SDLEMQYETLQEELMALK	3.05e-06	2186.01	2186.02	4.48076	2	0	SDLEMQYETLQEELM[147]ALK
										EIETYHNLLEGGQEDFESSGAGK	3.41e-06	2509.12	2509.14	4.91088	2	0
										GFGGASGGGYSSSGGFGGGFGGGSGGGFGGGYGSGFGGFGGFGGGAGGGDGGILTANEK	3.67e-06	4861.07	4861.1	6.13157	3	0
										GGGGSFGYSYGGGSGGGFSASSLGGGFGGGSR	3.94e-06	2705.16	2705.17	4.5428	2	0
										GGSGGSHGGGSGFGGESGGSYGGGEEASGSGGGYGGGSGK	6.58e-06	3222.27	3222.29	4.36152	3	0
										VQALEEANNDLENK	1.56e-05	1585.76	1585.77	4.35123	3	0
										VQALEEANNDLENK	1.6e-05	1585.76	1585.77	5.70642	2	0
										KDIENQYETQITQIEHEVSSSGQEVQSSAK	4.98e-05	3392.61	3392.62	2.27996	3	1
										EEMSQLTGQNSGDVNVEINVAPGK	5.12e-05	2516.19	2516.19	-0.155393	2	0
										DIENQYETQITQIEHEVSSSGQEVQSSAK	6.07e-05	3263.51	3263.52	5.29614	4	0
										SDLEMQYETLQEELMALK	6.45e-05	2202.01	2202.02	3.88191	2	0	SDLEM[147]QYETLQEELM[147]ALK
										HGVQELEIELQSQLSK	6.69e-05	1836.96	1836.97	5.95985	2	0
										EIETYHNLLEGGQEDFESSGAGK	7.44e-05	2510.13	2510.14	3.03649	3	0
										GGSGGSHGGGSGFGGESGGSYGGGEEASGSGGGYGGGSGK	7.79e-05	3223.28	3223.28	0.72845	3	0
										NHKEEMSQLTGQNSGDVNVEINVAPGKDLTK	8.93e-05	3368.64	3368.65	1.85743	4	2	NHKEEM[147]SQLTGQNSGDVNVEINVAPGKDLTK
										TLNDMRQEYEQLIAK	0.00011	1866.91	1866.92	4.42656	3	1	TLNDM[147]RQEYEQLIAK
										DIENQYETQITQIEHEVSSSGQEVQSSAK	0.000129	3263.51	3263.52	3.17205	2	0
										QVLDNLTMEK	0.00015	1205.6	1205.6	4.04281	2	0	QVLDNLTM[147]EK
										MTLDDFR	0.000162	896.406	896.411	5.53767	2	0
										HGVQELEIELQSQLSK	0.000182	1836.96	1836.97	5.68657	3	0
										GGSGGSHGGGSGFGGESGGSYGGGEEASGSGGGYGGGSGK	0.000209	3224.29	3224.3	3.78378	2	0
										EEMSQLTGQNSGDVNVEINVAPGKDLTK	0.000267	2988.43	2988.44	1.42851	3	1	EEM[147]SQLTGQNSGDVNVEINVAPGKDLTK
										SDLEMQYETLQEELMALK	0.000401	2171.03	2171.03	0.594189	2	0
										KDIENQYETQITQIEHEVSSSGQEVQSSAK	0.00046	3391.6	3391.62	4.9543	4	1
										NHKEEMSQLTGQNSGDVNVEINVAPGKDLTK	0.000508	3351.64	3351.65	4.27493	4	2
										SDLEMQYETLQEELMALKK	0.000571	2298.11	2298.13	5.91834	3	1
										SGGGGGGGLGSGGSIR	0.000614	1231.59	1231.6	5.66909	2	0
										EEMSQLTGQNSGDVNVEINVAPGK	0.000623	2515.19	2515.2	6.72594	3	0
										IKFEMEQNLR	0.000652	1322.67	1322.67	6.15046	3	1	IKFEM[147]EQNLR
										TLLDIDNTR	0.000752	1059.56	1059.56	4.80673	2	0
										IKFEMEQNLR	0.000966	1322.67	1322.67	4.41986	3	1	IKFEM[147]EQNLR
										HGVQELEIELQSQLSK	0.00113	1836.96	1836.97	6.9822	3	0
										NHKEEMSQLTGQNSGDVNVEINVAPGK	0.00168	2894.38	2894.4	6.04205	4	1
										TLLDIDNTR	0.00171	1059.56	1059.56	4.69159	2	0
										GGSGGSHGGGSGFGGESGGSYGGGEEASGSGGGYGGGSGK	0.00173	3222.27	3222.29	3.50498	4	0
										LASYLDKVQALEEANNDLENK	0.00201	2376.18	2376.19	3.84609	3	1
										EIETYHNLLEGGQEDFESSGAGK	0.00204	2509.12	2509.12	-1.80262	2	0
										NYSPYYNTIDDLK	0.00239	1604.74	1604.74	4.61571	2	0
										NHKEEMSQLTGQNSGDVNVEINVAPGK	0.00275	2910.38	2910.39	4.23828	4	1	NHKEEM[147]SQLTGQNSGDVNVEINVAPGK
										QVLDNLTMEK	0.00308	1189.6	1189.61	4.63264	2	0
										SDLEMQYETLQEELMALKK	0.00388	2330.1	2330.11	4.97575	3	1	SDLEM[147]QYETLQEELM[147]ALKK
										SDLEMQYETLQEELMALKK	0.00489	2314.11	2314.12	4.65795	2	1	SDLEMQYETLQEELM[147]ALKK
										IKFEMEQNLR	0.00536	1322.67	1322.67	4.48866	3	1	IKFEM[147]EQNLR
										NYSPYYNTIDDLKDQIVDLTVGNNK	0.00547	2901.4	2901.42	4.80802	4	1
										EIETYHNLLEGGQEDFESSGAGK	0.00579	2509.12	2509.15	10.1111	3	0
										MTLDDFR	0.00605	912.401	912.406	5.00986	2	0	M[147]TLDDFR
										DIENQYETQITQIEHEVSSSGQEVQSSAK	0.00624	3264.51	3264.53	5.69487	3	0
										SDLEMQYETLQEELMALK	0.00771	2204.02	2204.03	2.38791	3	0	SDLEM[147]QYETLQEELM[147]ALK
										QVLDNLTMEK	0.00838	1205.6	1205.6	4.54879	2	0	QVLDNLTM[147]EK
										TLNDMRQEYEQLIAK	0.00896	1850.92	1850.93	3.29944	2	1
										IKFEMEQNLR	0.0107	1306.67	1306.68	3.57014	2	1
										GFGGASGGGYSSSGGFGGGFGGGSGGGFGGGYGSGFGGFGGFGGGAGGGDGGILTANEK	0.0117	4863.09	4863.12	6.04081	5	0
										SDLEMQYETLQEELMALK	0.0132	2171.03	2171.03	1.31873	3	0
										EEMSQLTGQNSGDVNVEINVAPGKDLTK	0.0147	2972.44	2972.45	3.43691	3	1
										MTLDDFR	0.017	912.401	912.406	5.67842	2	0	M[147]TLDDFR
										TLNDMRQEYEQLIAK	0.0211	1850.92	1850.93	5.40272	3	1
										MTLDDFR	0.0246	912.401	912.405	4.14072	2	0	M[147]TLDDFR
										LEKEIETYHNLLEGGQEDFESSGAGK	0.0295	2881.36	2881.37	2.79729	3	1
										MTLDDFR	0.0375	912.401	912.406	4.943	2	0	M[147]TLDDFR
										QEYEQLIAK	0.0431	1120.58	1120.58	3.22334	2	0
										DIENQYETQITQIEHEVSSSGQEVQSSAK	0.0438	3266.53	3266.51	-5.28787	3	0
										HGVQELEIELQSQLSK	0.0447	1836.96	1836.97	5.38771	3	0
										VQALEEANNDLENKIQDWYDK	0.0456	2535.2	2535.23	11.2587	2	1
										IKFEMEQNLR	0.0478	1322.67	1322.67	4.33745	2	1	IKFEM[147]EQNLR
										QFSSSYLSR	0.049	1073.51	1073.52	4.39677	2	0
	P35908.2	-	Homo sapiens	Keratin, type II cytoskeletal 2 epidermal	65432.1	8.07353	27	58.3725	1576.06	GGGFGGGSSFGGGSGFSGGGFGGGGFGGGR	1.93e-09	2398.01	2398.02	4.93576	3	0
										GGGFGGGSSFGGGSGFSGGGFGGGGFGGGR	4.58e-09	2398.01	2398.02	5.37404	2	0
										SISISVAGGGGGFGAAGGFGGR	5.17e-09	1837.91	1837.92	5.36262	2	0
										VLYDAEISQIHQSVTDTNVILSMDNSR	7.69e-09	3063.48	3063.5	6.87812	3	0	VLYDAEISQIHQSVTDTNVILSM[147]DNSR
										MSGDLSSNVTVSVTSSTISSNVASK	1.87e-08	2473.19	2473.2	6.33192	2	0	M[147]SGDLSSNVTVSVTSSTISSNVASK
										VLYDAEISQIHQSVTDTNVILSMDNSR	2.34e-08	3063.48	3063.5	5.80222	3	0	VLYDAEISQIHQSVTDTNVILSM[147]DNSR
										TSQNSELNNMQDLVEDYK	4.79e-08	2142.94	2142.95	5.09488	3	0	TSQNSELNNM[147]QDLVEDYK
										TSQNSELNNMQDLVEDYK	5.72e-08	2142.94	2142.95	5.38606	2	0	TSQNSELNNM[147]QDLVEDYK
										GGGFGGGSSFGGGSGFSGGGFGGGGFGGGR	1.01e-07	2398.01	2398.03	6.29063	2	0
										GGGFGGGSSFGGGSGFSGGGFGGGGFGGGR	1.56e-07	2399.02	2399.03	4.46141	2	0
										GGGFGGGSSFGGGSGFSGGGFGGGGFGGGR	4.05e-07	2398.01	2398.04	11.8844	3	0
										LNDLEEALQQAKEDLAR	6.58e-07	1955	1955.01	9.72074	2	1
										AAFGGSGGRGSSSGGGYSSGSSSYGSGGR	7.51e-07	2501.07	2501.06	-1.85961	2	1
										MSGDLSSNVTVSVTSSTISSNVASK	9.5e-07	2473.19	2473.2	4.37695	3	0	M[147]SGDLSSNVTVSVTSSTISSNVASK
										MSGDLSSNVTVSVTSSTISSNVASK	1.11e-06	2457.19	2457.2	4.96299	3	0
										MSGDLSSNVTVSVTSSTISSNVASK	1.27e-06	2457.19	2457.2	5.29141	2	0
										TSQNSELNNMQDLVEDYK	2.06e-06	2126.94	2126.95	2.4547	2	0
										MSGDLSSNVTVSVTSSTISSNVASK	2.26e-06	2475.2	2475.19	-5.69651	2	0	M[147]SGDLSSNVTVSVTSSTISSNVASK
										GFSSGSAVVSGGSR	2.75e-06	1253.6	1253.61	4.70724	2	0
										SISISVAGGGGGFGAAGGFGGR	4.13e-06	1837.91	1837.91	3.03769	2	0
										NVQDAIADAEQR	6.17e-06	1328.63	1328.64	3.94842	2	0
										VLYDAEISQIHQSVTDTNVILSMDNSR	6.87e-06	3063.48	3063.49	3.29201	3	0	VLYDAEISQIHQSVTDTNVILSM[147]DNSR
										YEELQVTVGR	1.02e-05	1192.61	1192.61	3.63153	2	0
										TSQNSELNNMQDLVEDYKK	1.08e-05	2255.04	2255.05	4.69482	3	1
										VDLLNQEIEFLK	3.95e-05	1459.79	1459.8	4.15607	2	0
										TSQNSELNNMQDLVEDYKK	4.03e-05	2255.04	2255.05	3.50992	2	1
										VLYDAEISQIHQSVTDTNVILSMDNSR	4.12e-05	3047.49	3047.5	5.20068	3	0
										LNDLEEALQQAK	4.15e-05	1370.7	1370.71	3.94615	2	0
										NLDLDSIIAEVK	4.49e-05	1328.72	1328.72	2.92236	2	0
										VDLLNQEIEFLK	4.63e-05	1459.79	1459.8	5.57751	2	0
										VLYDAEISQIHQSVTDTNVILSMDNSR	5.47e-05	3063.48	3063.5	4.78181	4	0	VLYDAEISQIHQSVTDTNVILSM[147]DNSR
										FGGFGGPGGVGGLGGPGGFGPGGYPGGIHEVSVNQSLLQPLNVK	5.51e-05	4092.07	4092.08	2.57522	4	0
										MSGDLSSNVTVSVTSSTISSNVASK	5.74e-05	2474.19	2474.22	11.7068	3	0	M[147]SGDLSSNVTVSVTSSTISSNVASK
										VLYDAEISQIHQSVTDTNVILSMDNSR	6.17e-05	3048.49	3048.52	8.74694	3	0
										NLDLDSIIAEVK	6.85e-05	1328.72	1328.72	4.66765	2	0
										NKLNDLEEALQQAKEDLAR	7.43e-05	2197.13	2197.15	5.77662	3	2
										DVDNAYMIK	0.000114	1083.49	1083.5	4.55288	2	0	DVDNAYM[147]IK
										VDLLNQEIEFLK	0.000129	1459.79	1459.81	8.75536	2	0
										DVDNAYMIK	0.000135	1083.49	1083.5	4.44028	2	0	DVDNAYM[147]IK
										YEELQVTVGR	0.000141	1192.61	1192.62	7.41819	2	0
										MSGDLSSNVTVSVTSSTISSNVASK	0.000471	2458.2	2458.2	2.51322	2	0
										TSQNSELNNMQDLVEDYKK	0.000516	2271.03	2271.04	5.08579	2	1	TSQNSELNNM[147]QDLVEDYKK
										HGGGGGGFGGGGFGSR	0.000523	1319.58	1319.58	5.18576	3	0
										DVDNAYMIK	0.000528	1067.5	1067.5	4.87496	2	0
										AAFGGSGGRGSSSGGGYSSGSSSYGSGGR	0.000699	2501.07	2501.05	-5.25695	3	1
										YEELQVTVGR	0.000705	1192.61	1192.61	0.560955	2	0
										TSQNSELNNMQDLVEDYKK	0.000807	2272.04	2272.03	-3.83576	3	1	TSQNSELNNM[147]QDLVEDYKK
										LNDLEEALQQAK	0.000811	1370.7	1370.71	3.41211	2	0
										YLDGLTAER	0.000862	1036.52	1036.52	4.21025	2	0
										FGGFGGPGGVGGLGGPGGFGPGGYPGGIHEVSVNQSLLQPLNVK	0.000898	4091.07	4091.1	8.82729	3	0
										SKEEAEALYHSK	0.00113	1390.67	1390.68	3.7845	3	1
										TAAENDFVTLKK	0.00117	1335.7	1335.71	3.22377	2	1
										LNDLEEALQQAKEDLAR	0.00141	1955	1955	3.56369	3	1
										IEISELNR	0.00367	972.524	972.528	4.5932	2	0
										NKLNDLEEALQQAK	0.00612	1612.84	1612.85	5.30554	3	1
										TSQNSELNNMQDLVEDYKK	0.00839	2271.03	2271.04	5.34867	3	1	TSQNSELNNM[147]QDLVEDYKK
										IEISELNR	0.00852	972.524	972.529	4.65593	2	0
										TSQNSELNNMQDLVEDYKK	0.00866	2271.03	2271.04	4.78417	3	1	TSQNSELNNM[147]QDLVEDYKK
										TAAENDFVTLK	0.0118	1207.61	1207.61	4.97429	2	0
										GSSSGGGYSSGSSSYGSGGRQSGSRGGSGGGGSISGGGYGSGGGSGGR	0.0172	3980.7	3980.67	-7.78381	3	2
										TSQNSELNNMQDLVEDYKK	0.0228	2271.03	2271.04	3.57503	3	1	TSQNSELNNM[147]QDLVEDYKK
										IEISELNR	0.0231	972.524	972.529	5.40861	2	0
										EIKIEISELNR	0.0252	1342.75	1342.75	4.74773	3	1
										IEISELNR	0.0358	972.524	972.528	4.27959	2	0
										TSQNSELNNMQDLVEDYKKK	0.0369	2399.13	2399.14	6.56739	3	2	TSQNSELNNM[147]QDLVEDYKKK
										TAAENDFVTLKK	0.0497	1335.7	1335.71	4.05928	3	1
	P04264.6	-	Homo sapiens	Keratin, type II cytoskeletal 1	66037.9	8.15059	28	41.7702	1169.57	NMQDMVEDYR	3.43e-07	1299.52	1299.53	3.89912	2	0
										QISNLQQSISDAEQR	3.9e-07	1715.84	1715.85	3.77307	2	0
										THNLEPYFESFINNLR	5.84e-07	1992.97	1992.98	5.48478	3	0
										THNLEPYFESFINNLR	7.18e-07	1992.97	1992.98	5.66843	3	0
										NMQDMVEDYR	1.02e-06	1315.52	1315.52	4.48113	2	0	NMQDM[147]VEDYR
										QISNLQQSISDAEQR	2.46e-06	1715.84	1715.85	4.41357	2	0
										SGGGFSSGSAGIINYQR	4.47e-06	1656.79	1656.79	4.94874	2	0
										NMQDMVEDYR	9.4e-06	1315.52	1315.52	4.85208	2	0	NMQDM[147]VEDYR
										NKLNDLEDALQQAK	9.81e-06	1598.83	1598.83	4.87983	2	1
										LALDLEIATYR	1.16e-05	1276.7	1276.71	6.23794	2	0
										SLDLDSIIAEVK	1.3e-05	1301.71	1301.71	4.97884	2	0
										SLDLDSIIAEVK	1.35e-05	1302.72	1302.72	0.767627	2	0
										NMQDMVEDYR	1.74e-05	1331.51	1331.52	6.05702	2	0	NM[147]QDM[147]VEDYR
										TNAENEFVTIK	2.01e-05	1264.63	1264.64	4.187	2	0
										NKLNDLEDALQQAK	2.18e-05	1598.83	1598.83	4.79539	3	1
										KQISNLQQSISDAEQR	2.2e-05	1843.94	1843.95	4.11131	2	1
										NMQDMVEDYR	2.28e-05	1331.51	1331.52	4.49864	2	0	NM[147]QDM[147]VEDYR
										NMQDMVEDYR	3.9e-05	1331.51	1331.52	6.05702	2	0	NM[147]QDM[147]VEDYR
										TNAENEFVTIK	4.23e-05	1264.63	1264.63	2.16032	2	0
										LNDLEDALQQAK	5.14e-05	1356.69	1356.7	6.43479	2	0
										NMQDMVEDYR	5.19e-05	1315.52	1315.53	7.63578	2	0	NM[147]QDMVEDYR
										LNDLEDALQQAK	5.76e-05	1356.69	1356.69	4.18519	2	0
										LALDLEIATYR	6.47e-05	1276.7	1276.71	5.56825	2	0
										TNAENEFVTIKK	6.48e-05	1392.72	1392.73	4.59674	2	1
										NMQDMVEDYR	6.64e-05	1331.51	1331.52	5.50727	2	0	NM[147]QDM[147]VEDYR
										SLDLDSIIAEVK	7.09e-05	1301.71	1301.71	5.07257	2	0
										NKLNDLEDALQQAKEDLAR	7.32e-05	2183.12	2183.13	5.32175	3	2
										LNDLEDALQQAKEDLAR	7.79e-05	1940.98	1940.99	5.48898	3	1
										SKAEAESLYQSK	8.92e-05	1339.66	1339.67	3.37175	2	1
										SLNNQFASFIDK	9.58e-05	1382.68	1382.69	5.86251	2	0
										GGGGGGYGSGGSSYGSGGGSYGSGGGGGGGR	0.00011	2383.95	2383.95	-1.17997	2	0
										NMQDMVEDYR	0.000112	1315.52	1315.52	3.92393	2	0	NMQDM[147]VEDYR
										SGGGFSSGSAGIINYQR	0.000127	1656.79	1656.79	4.80147	2	0
										LALDLEIATYR	0.000147	1276.7	1276.7	-1.31589	2	0
										QISNLQQSISDAEQR	0.000165	1715.84	1715.86	10.1763	2	0
										NKLNDLEDALQQAK	0.000177	1598.83	1598.83	4.33693	3	1
										YEELQITAGR	0.000207	1178.59	1178.6	5.76705	2	0
										KQISNLQQSISDAEQR	0.000229	1843.94	1843.95	4.3022	3	1
										SLNNQFASFIDK	0.000262	1382.68	1382.69	4.89122	2	0
										NMQDMVEDYR	0.000331	1315.52	1315.54	18.0286	2	0	NMQDM[147]VEDYR
										LDSELKNMQDMVEDYR	0.000338	2016.88	2016.88	2.46321	3	1	LDSELKNM[147]QDM[147]VEDYR
										LDSELKNMQDMVEDYR	0.000352	2016.88	2016.89	5.0722	2	1	LDSELKNM[147]QDM[147]VEDYR
										NMQDMVEDYR	0.000392	1299.52	1299.53	3.61748	2	0
										YEELQITAGR	0.000443	1178.59	1178.6	5.56002	2	0
										YEELQITAGR	0.000502	1178.59	1178.6	5.97407	2	0
										SLDLDSIIAEVK	0.000505	1301.71	1301.72	5.82312	2	0
										SLNNQFASFIDK	0.000581	1382.68	1382.69	5.59709	2	0
										DYQELMNTK	0.000792	1156.51	1156.51	5.72413	2	0	DYQELM[147]NTK
										TNAENEFVTIKK	0.000879	1392.72	1392.73	5.30973	3	1
										LALDLEIATYR	0.000911	1276.7	1276.71	5.85571	2	0
										SLNNQFASFIDKVR	0.000942	1637.85	1637.86	4.5871	3	1
										LDSELKNMQDMVEDYR	0.00102	2000.88	2000.89	3.89978	3	1	LDSELKNM[147]QDMVEDYR
										YEELQITAGR	0.00103	1178.59	1178.59	0.899377	2	0
										SLNNQFASFIDK	0.00108	1382.68	1382.69	6.56839	2	0
										SLDLDSIIAEVK	0.0013	1302.72	1302.72	-0.0752275	2	0
										YEELQITAGR	0.00159	1178.59	1178.6	3.69593	2	0
										AQYEDIAQK	0.00168	1064.51	1064.52	6.12486	2	0
										DYQELMNTK	0.00177	1156.51	1156.51	4.77472	2	0	DYQELM[147]NTK
										SGYRSGGGFSSGSAGIINYQR	0.0018	2121.01	2121	-3.91511	2	1
										LNDLEDALQQAK	0.00286	1356.69	1356.7	6.61464	2	0
										SLNNQFASFIDK	0.00308	1382.68	1382.69	5.24415	2	0
										SGGGFSSGSAGIINYQR	0.00324	1657.79	1657.8	1.05019	2	0
										NKYEDEINKR	0.00357	1307.65	1307.66	11.7968	3	2
										YEELQITAGR	0.00361	1178.59	1178.61	10.1171	2	0
										LDNLQQEIDFLTALYQAELSQMQTQISETNVILSMDNNR	0.00375	4561.21	4561.2	-1.1611	3	0	LDNLQQEIDFLTALYQAELSQM[147]QTQISETNVILSM[147]DNNR
										SGGGFSSGSAGIINYQR	0.00416	1656.79	1656.79	3.79832	3	0
										LDNLQQEIDFLTALYQAELSQMQTQISETNVILSMDNNR	0.00426	4543.2	4543.23	6.22359	3	0	LDNLQQEIDFLTALYQAELSQMQTQISETNVILSM[147]DNNR
										DVDGAYMTK	0.00483	998.438	998.443	5.5056	2	0
										DYQELMNTK	0.00493	1140.51	1140.53	12.8925	2	0
										LNDLEDALQQAKEDLAR	0.00521	1940.98	1940.99	5.20613	3	1
[truncated: 6,868 more rows]

## Sheet: Table S4
Spot Number	NCBI Accession Number Version	Locus	Taxonomy	Protein Description	Mr	pI	# Unique Peptides	Coverage [%]	Peptide Sequence	Expectation	mr_calc	mr_exp	ppm	z	# Missed cleavages	Modififed Peptide Sequence
1	P04264.6	-	Homo sapiens	Keratin, type II cytoskeletal 1	66037.9	8.15059	17	24.8447	AEAESLYQSK	2.16e-07	1124.53	1124.53	-2.02839	2	0
									AEAESLYQSK	3.56e-07	1124.53	1124.53	-2.24537	2	0
									SKAEAESLYQSK	4.2e-07	1339.66	1339.66	-1.45708	2	1
									AEAESLYQSK	5.3e-07	1124.53	1124.53	-2.13688	2	0
									AEAESLYQSK	5.5e-07	1124.53	1124.53	-1.48506	2	0
									SKAEAESLYQSK	6.6e-07	1339.66	1339.66	-1.8221	2	1
									SKAEAESLYQSK	7.18e-07	1339.66	1339.66	-1.8221	2	1
									QISNLQQSISDAEQR	7.92e-07	1715.84	1715.84	-1.91801	2	0
									AEAESLYQSK	1.04e-06	1124.53	1124.53	-1.70293	2	0
									QISNLQQSISDAEQR	1.17e-06	1715.84	1715.84	-0.566485	2	0
									AEAESLYQSK	1.38e-06	1124.53	1124.53	-1.81142	2	0
									AEAESLYQSK	1.39e-06	1124.53	1124.53	-1.37657	2	0
									SKAEAESLYQSK	1.44e-06	1339.66	1339.66	-1.00175	2	1
									TNAENEFVTIK	1.47e-06	1264.63	1264.63	-2.76286	2	0
									QISNLQQSISDAEQR	1.67e-06	1715.84	1715.84	-1.8469	2	0
									SKAEAESLYQSK	1.82e-06	1339.66	1339.66	-2.27744	2	1
									AEAESLYQSK	1.87e-06	1124.53	1124.53	-1.48506	2	0
									SKAEAESLYQSK	2.03e-06	1339.66	1339.66	-2.00424	2	1
									AEAESLYQSK	2.46e-06	1124.53	1124.53	-2.57084	2	0
									TNAENEFVTIK	2.7e-06	1264.63	1264.63	-2.47345	2	0
									AEAESLYQSK	2.82e-06	1124.53	1124.53	-1.26808	2	0
									SKAEAESLYQSK	3.22e-06	1339.66	1339.66	-1.8221	2	1
									AEAESLYQSK	3.48e-06	1124.53	1124.53	-1.70293	2	0
									TNAENEFVTIK	3.55e-06	1264.63	1264.63	-2.27972	2	0
									AEAESLYQSK	3.62e-06	1124.53	1124.53	-2.13688	2	0
									AEAESLYQSK	3.63e-06	1124.53	1124.53	-1.26808	2	0
									DVDGAYMTK	4.14e-06	1014.43	1014.43	-2.42993	2	0	DVDGAYM[147]TK
									DVDGAYMTK	4.78e-06	1014.43	1014.43	-1.58709	2	0	DVDGAYM[147]TK
									TNAENEFVTIK	5.04e-06	1264.63	1264.63	-1.99031	2	0
									AEAESLYQSK	5.05e-06	1124.53	1124.53	-2.02839	2	0
									AEAESLYQSK	5.34e-06	1124.53	1124.53	-1.15959	2	0
									SKAEAESLYQSK	5.39e-06	1339.66	1339.66	-1.91317	2	1
									AEAESLYQSK	5.49e-06	1124.53	1124.53	-1.70293	2	0
									TNAENEFVTIK	5.53e-06	1264.63	1264.63	-2.66639	2	0
									AEAESLYQSK	5.68e-06	1124.53	1124.53	-1.81142	2	0
									AEAESLYQSK	5.68e-06	1124.53	1124.53	-1.59355	2	0
									TNAENEFVTIK	5.76e-06	1264.63	1264.63	-2.66639	2	0
									TNAENEFVTIK	5.95e-06	1264.63	1264.63	-2.76286	2	0
									TNAENEFVTIK	6.09e-06	1264.63	1264.63	-2.27972	2	0
									SLNNQFASFIDK	6.17e-06	1382.68	1382.68	-2.34833	2	0
									TNAENEFVTIK	6.3e-06	1264.63	1264.63	-2.76286	2	0
									AEAESLYQSK	6.36e-06	1124.53	1124.53	-1.26808	2	0
									AEAESLYQSK	7.04e-06	1124.53	1124.53	-2.13688	2	0
									TNAENEFVTIK	7.44e-06	1264.63	1264.63	-2.85933	2	0
									AEAESLYQSK	7.53e-06	1124.53	1124.53	-2.24537	2	0
									AEAESLYQSK	7.99e-06	1124.53	1124.53	-1.70293	2	0
									AEAESLYQSK	8.04e-06	1124.53	1124.53	-2.13688	2	0
									TNAENEFVTIK	8.06e-06	1264.63	1264.63	-1.60442	2	0
									SKAEAESLYQSK	8.1e-06	1339.66	1339.66	-2.27744	2	1
									LNDLEDALQQAK	8.25e-06	1356.69	1356.68	-2.74271	2	0
									AEAESLYQSK	8.36e-06	1124.53	1124.53	-2.46235	2	0
									AEAESLYQSK	8.46e-06	1124.53	1124.53	-2.57084	2	0
									AEAESLYQSK	8.54e-06	1124.53	1124.53	-2.13688	2	0
									TNAENEFVTIK	8.85e-06	1264.63	1264.63	-2.76286	2	0
									AEAESLYQSK	8.88e-06	1124.53	1124.53	-1.37657	2	0
									AEAESLYQSK	9.06e-06	1124.53	1124.53	-1.15959	2	0
									SLNNQFASFIDK	9.2e-06	1382.68	1382.68	-2.70127	2	0
									TNAENEFVTIK	9.81e-06	1264.63	1264.63	-2.18325	2	0
									DVDGAYMTK	1e-05	1014.43	1014.43	-2.30967	2	0	DVDGAYM[147]TK
									DVDGAYMTK	1.03e-05	1014.43	1014.43	-1.58709	2	0	DVDGAYM[147]TK
									LNDLEDALQQAK	1.04e-05	1356.69	1356.68	-3.46284	2	0
									TNAENEFVTIK	1.05e-05	1264.63	1264.63	-1.60442	2	0
									AEAESLYQSK	1.06e-05	1124.53	1124.53	-0.400165	2	0
									DVDGAYMTK	1.09e-05	1014.43	1014.43	-2.73059	2	0	DVDGAYM[147]TK
									SLDLDSIIAEVK	1.14e-05	1301.71	1301.71	-1.77306	2	0
									AEAESLYQSK	1.14e-05	1124.53	1124.53	-2.13688	2	0
									TNAENEFVTIK	1.16e-05	1264.63	1264.63	-2.56992	2	0
									SLDLDSIIAEVK	1.17e-05	1301.71	1301.7	-2.71105	2	0
									DVDGAYMTK	1.23e-05	1014.43	1014.43	-3.45218	2	0	DVDGAYM[147]TK
									AEAESLYQSK	1.29e-05	1124.53	1124.53	-0.834123	2	0
									SKAEAESLYQSK	1.33e-05	1339.66	1339.66	-2.45958	2	1
									TNAENEFVTIK	1.36e-05	1264.63	1264.63	-1.60442	2	0
									DVDGAYMTK	1.37e-05	1014.43	1014.43	-2.73059	2	0	DVDGAYM[147]TK
									AEAESLYQSK	1.39e-05	1124.53	1124.53	-2.46235	2	0
									DVDGAYMTK	1.4e-05	1014.43	1014.43	-2.30967	2	0	DVDGAYM[147]TK
									DVDGAYMTK	1.4e-05	1014.43	1014.43	-2.42993	2	0	DVDGAYM[147]TK
									SLNNQFASFIDK	1.49e-05	1382.68	1382.68	-2.70127	2	0
									TNAENEFVTIKK	1.5e-05	1392.72	1392.72	-2.941	2	1
									TLLEGEESR	1.51e-05	1032.51	1032.51	-1.88376	2	0
									NMQDMVEDYR	1.51e-05	1331.51	1331.51	-2.10212	2	0	NM[147]QDM[147]VEDYR
									TNAENEFVTIK	1.66e-05	1264.63	1264.63	-2.18325	2	0
									SLNNQFASFIDK	1.66e-05	1382.68	1382.68	-2.34833	2	0
									TLLEGEESR	1.69e-05	1032.51	1032.51	-2.00192	2	0
									SLDLDSIIAEVK	1.69e-05	1301.71	1301.7	-2.99222	2	0
									DVDGAYMTK	1.75e-05	1014.43	1014.43	-1.70736	2	0	DVDGAYM[147]TK
									AEAESLYQSK	1.76e-05	1124.53	1124.53	-0.834123	2	0
									TNAENEFVTIK	1.79e-05	1264.63	1264.63	-1.99031	2	0
									SLDLDSIIAEVK	1.85e-05	1301.71	1301.7	-2.99222	2	0
									SLDLDSIIAEVK	1.89e-05	1301.71	1301.71	-1.77306	2	0
									TNAENEFVTIKK	1.89e-05	1392.72	1392.72	-2.50301	2	1
									TNAENEFVTIKK	1.92e-05	1392.72	1392.72	-2.24021	2	1
									YEELQITAGR	1.99e-05	1178.59	1178.59	-1.48312	2	0
									TNAENEFVTIK	2e-05	1264.63	1264.63	-1.99031	2	0
									SKAEAESLYQSK	2.08e-05	1339.66	1339.66	-2.18637	2	1
									TNAENEFVTIK	2.16e-05	1264.63	1264.63	-1.99031	2	0
									SLDLDSIIAEVK	2.22e-05	1301.71	1301.7	-2.24244	2	0
									DVDGAYMTK	2.28e-05	1014.43	1014.43	-2.49006	2	0	DVDGAYM[147]TK
									TNAENEFVTIK	2.3e-05	1264.63	1264.63	-2.56992	2	0
									TNAENEFVTIK	2.31e-05	1264.63	1264.63	-1.99031	2	0
									LNDLEDALQQAK	2.38e-05	1356.69	1356.68	-3.19233	2	0
									NMQDMVEDYR	2.38e-05	1331.51	1331.51	-2.10212	2	0	NM[147]QDM[147]VEDYR
									SKAEAESLYQSK	2.41e-05	1339.66	1339.66	-2.36851	2	1
									TLLEGEESR	2.45e-05	1032.51	1032.51	-2.23824	2	0
									SLDLDSIIAEVK	2.45e-05	1301.71	1301.7	-2.24244	2	0
									SKAEAESLYQSK	2.49e-05	1339.66	1339.66	-2.0953	2	1
									LNDLEDALQQAK	2.49e-05	1356.69	1356.69	-1.48302	2	0
									TNAENEFVTIKK	2.52e-05	1392.72	1392.72	-2.24021	2	1
									DVDGAYMTK	2.54e-05	1014.43	1014.43	-2.30967	2	0	DVDGAYM[147]TK
									SLNNQFASFIDK	2.55e-05	1382.68	1382.68	-2.2601	2	0
									LNDLEDALQQAK	2.55e-05	1356.69	1356.69	-1.66287	2	0
									TNAENEFVTIK	2.55e-05	1264.63	1264.63	-1.89383	2	0
									TNAENEFVTIK	2.6e-05	1264.63	1264.63	-1.02481	2	0
									SKAEAESLYQSK	2.61e-05	1339.66	1339.66	-2.18637	2	1
									SLDLDSIIAEVK	2.61e-05	1301.71	1301.7	-3.08595	2	0
									DVDGAYMTK	2.64e-05	1014.43	1014.43	-2.30967	2	0	DVDGAYM[147]TK
									TLLEGEESR	2.67e-05	1032.51	1032.51	-2.23824	2	0
									TLLEGEESR	2.74e-05	1032.51	1032.51	-2.00192	2	0
									SKAEAESLYQSK	2.78e-05	1339.66	1339.66	-1.00175	2	1
									TNAENEFVTIK	2.79e-05	1264.63	1264.63	-2.76286	2	0
									DVDGAYMTK	2.79e-05	1014.43	1014.43	-3.03125	2	0	DVDGAYM[147]TK
									SLDLDSIIAEVK	2.81e-05	1301.71	1301.71	-1.9605	2	0
									DVDGAYMTK	2.82e-05	1014.43	1014.43	-2.91099	2	0	DVDGAYM[147]TK
									DVDGAYMTK	2.84e-05	1014.43	1014.43	-2.42993	2	0	DVDGAYM[147]TK
									DVDGAYMTK	2.87e-05	1014.43	1014.43	-2.06815	2	0	DVDGAYM[147]TK
									YEELQITAGR	2.91e-05	1178.59	1178.59	-1.58664	2	0
									TLLEGEESR	2.91e-05	1032.51	1032.51	-1.05568	2	0
									TNAENEFVTIK	2.93e-05	1264.63	1264.63	-1.89383	2	0
									TLLEGEESR	2.94e-05	1032.51	1032.51	-1.88376	2	0
									TNAENEFVTIK	2.96e-05	1264.63	1264.63	-1.89383	2	0
									TNAENEFVTIK	3.01e-05	1264.63	1264.63	-1.89383	2	0
									SLDLDSIIAEVK	3.11e-05	1301.71	1301.71	-1.9605	2	0
									YEELQITAGR	3.17e-05	1178.59	1178.59	-0.757683	2	0
									DVDGAYMTK	3.19e-05	1014.43	1014.43	-2.42993	2	0	DVDGAYM[147]TK
									SLNNQFASFIDK	3.22e-05	1382.68	1382.68	-3.4961	2	0
									SKAEAESLYQSK	3.29e-05	1339.66	1339.66	-2.00424	2	1
									SKAEAESLYQSK	3.34e-05	1339.66	1339.66	-1.8221	2	1
									YEELQITAGR	3.37e-05	1178.59	1178.59	-0.757683	2	0
									YEELQITAGR	3.43e-05	1178.59	1178.59	-1.2761	2	0
									DVDGAYMTK	3.45e-05	1014.43	1014.43	-2.85085	2	0	DVDGAYM[147]TK
									TNAENEFVTIK	3.53e-05	1264.63	1264.63	-1.99031	2	0
									YEELQITAGR	3.57e-05	1178.59	1178.59	-0.757683	2	0
									YEELQITAGR	3.59e-05	1178.59	1178.59	-0.65417	2	0
									LNDLEDALQQAK	3.62e-05	1356.69	1356.68	-2.83263	2	0
									SLNNQFASFIDK	3.67e-05	1382.68	1382.68	-2.87774	2	0
									SKAEAESLYQSK	3.67e-05	1339.66	1339.66	-1.91317	2	1
									SLDLDSIIAEVK	3.71e-05	1301.71	1301.71	-1.9605	2	0
									SKAEAESLYQSK	3.72e-05	1339.66	1339.66	-2.45958	2	1
									LNDLEDALQQAK	3.75e-05	1356.69	1356.68	-2.83263	2	0
									SLDLDSIIAEVK	3.77e-05	1301.71	1301.7	-3.08595	2	0
									YEELQITAGR	3.78e-05	1178.59	1178.59	-0.757683	2	0
									SLDLDSIIAEVK	3.8e-05	1301.71	1301.71	-1.86678	2	0
									SLNNQFASFIDK	3.83e-05	1382.68	1382.68	-0.759393	2	0
									SLDLDSIIAEVK	3.88e-05	1301.71	1301.71	-1.77306	2	0
									TNAENEFVTIKK	3.9e-05	1392.72	1392.72	-2.50301	2	1
									SLDLDSIIAEVK	3.95e-05	1301.71	1301.7	-2.8985	2	0
									SLDLDSIIAEVK	4e-05	1301.71	1301.7	-2.8985	2	0
									TLLEGEESR	4.03e-05	1032.51	1032.51	-2.3564	2	0
									SLDLDSIIAEVK	4.05e-05	1301.71	1301.7	-2.33616	2	0
									LNDLEDALQQAK	4.06e-05	1356.69	1356.69	-2.56286	2	0
									SLNNQFASFIDK	4.07e-05	1382.68	1382.68	-2.08363	2	0
									SLNNQFASFIDK	4.09e-05	1382.68	1382.68	-2.70127	2	0
									SLDLDSIIAEVK	4.12e-05	1301.71	1301.7	-2.24244	2	0
									TNAENEFVTIKK	4.18e-05	1392.72	1392.72	-2.941	2	1
									SLDLDSIIAEVK	4.2e-05	1301.71	1301.7	-2.61733	2	0
									SLNNQFASFIDK	4.29e-05	1382.68	1382.68	-2.70127	2	0
									LNDLEDALQQAK	4.36e-05	1356.69	1356.68	-3.46284	2	0
									SLDLDSIIAEVK	4.4e-05	1301.71	1301.7	-2.61733	2	0
									DVDGAYMTK	4.44e-05	1014.43	1014.43	-2.85085	2	0	DVDGAYM[147]TK
									SLNNQFASFIDK	4.49e-05	1382.68	1382.68	-2.87774	2	0
									SLNNQFASFIDK	4.52e-05	1382.68	1382.68	-3.2314	2	0
									YEELQITAGR	4.69e-05	1178.59	1178.59	-1.06907	2	0
									SLNNQFASFIDK	4.81e-05	1382.68	1382.68	-3.2314	2	0
									LNDLEDALQQAK	4.85e-05	1356.69	1356.68	-2.74271	2	0
									SLDLDSIIAEVK	4.89e-05	1301.71	1301.7	-2.71105	2	0
									SLDLDSIIAEVK	4.9e-05	1301.71	1301.7	-3.8365	2	0
									LNDLEDALQQAK	4.98e-05	1356.69	1356.68	-2.65278	2	0
									SKAEAESLYQSK	5.04e-05	1339.66	1339.66	-2.45958	2	1
									DVDGAYMTK	5.05e-05	1014.43	1014.43	-1.58709	2	0	DVDGAYM[147]TK
									SLDLDSIIAEVK	5.06e-05	1301.71	1301.7	-2.24244	2	0
									SLDLDSIIAEVK	5.1e-05	1301.71	1301.7	-3.8365	2	0
									TNAENEFVTIKK	5.23e-05	1392.72	1392.72	-3.0286	2	1
									SLDLDSIIAEVK	5.33e-05	1301.71	1301.7	-3.8365	2	0
									DVDGAYMTK	5.36e-05	1014.43	1014.43	-1.70736	2	0	DVDGAYM[147]TK
									SLDLDSIIAEVK	5.5e-05	1301.71	1301.71	-1.30444	2	0
									YEELQITAGR	5.51e-05	1178.59	1178.59	-1.48312	2	0
									SLDLDSIIAEVK	5.73e-05	1301.71	1301.71	-1.30444	2	0
									SLDLDSIIAEVK	5.74e-05	1301.71	1301.7	-3.27339	2	0
									SLDLDSIIAEVK	5.87e-05	1301.71	1301.7	-3.8365	2	0
									SLDLDSIIAEVK	5.99e-05	1301.71	1301.7	-6.08662	2	0
									YEELQITAGR	6.17e-05	1178.59	1178.59	-1.58664	2	0
									YEELQITAGR	6.24e-05	1178.59	1178.59	-1.2761	2	0
									TNAENEFVTIKK	6.32e-05	1392.72	1392.72	-2.50301	2	1
									SKAEAESLYQSK	6.4e-05	1339.66	1339.66	-2.36851	2	1
									SLNNQFASFIDK	6.53e-05	1382.68	1382.68	-1.81893	2	0
									TNAENEFVTIKK	6.57e-05	1392.72	1392.72	-2.32781	2	1
									SLDLDSIIAEVK	6.58e-05	1301.71	1301.7	-3.17967	2	0
									LNDLEDALQQAK	6.74e-05	1356.69	1356.69	-1.66287	2	0
									YEELQITAGR	6.82e-05	1178.59	1178.59	-1.48312	2	0
									LNDLEDALQQAK	6.86e-05	1356.69	1356.69	-2.11323	2	0
									SKAEAESLYQSK	7.11e-05	1339.66	1339.66	-2.36851	2	1
									YEELQITAGR	7.12e-05	1178.59	1178.59	-0.757683	2	0
									SLDLDSIIAEVK	7.17e-05	1301.71	1301.71	-2.14795	2	0
									TNAENEFVTIKK	7.28e-05	1392.72	1392.72	-2.941	2	1
									SLDLDSIIAEVK	7.33e-05	1301.71	1301.7	-2.61733	2	0
									SLNNQFASFIDK	7.67e-05	1382.68	1382.68	-3.14316	2	0
									YEELQITAGR	7.71e-05	1178.59	1178.59	-1.79366	2	0
									SLDLDSIIAEVK	7.85e-05	1301.71	1301.71	-1.9605	2	0
									SLDLDSIIAEVK	7.88e-05	1301.71	1301.7	-2.33616	2	0
									YEELQITAGR	8.03e-05	1178.59	1178.59	-1.58664	2	0
									YEELQITAGR	8.09e-05	1178.59	1178.59	-1.06907	2	0
									YEELQITAGR	8.17e-05	1178.59	1178.59	-1.48312	2	0
									SLDLDSIIAEVK	8.53e-05	1302.72	1302.71	-5.51003	2	0
									YEELQITAGR	8.59e-05	1178.59	1178.59	-1.58664	2	0
									SLNNQFASFIDK	8.7e-05	1382.68	1382.68	-3.4961	2	0
									YEELQITAGR	8.71e-05	1178.59	1178.59	-0.965558	2	0
									LNDLEDALQQAK	8.72e-05	1356.69	1356.69	-2.56286	2	0
									SLDLDSIIAEVK	8.87e-05	1301.71	1301.71	-1.9605	2	0
									TNAENEFVTIK	8.92e-05	1264.63	1264.63	-2.85933	2	0
									SLDLDSIIAEVK	9.01e-05	1301.71	1301.7	-2.24244	2	0
									SLNNQFASFIDK	9.24e-05	1382.68	1382.68	-2.7895	2	0
									DVDGAYMTK	9.43e-05	1014.43	1014.43	-3.33191	2	0	DVDGAYM[147]TK
									SLDLDSIIAEVK	9.49e-05	1301.71	1301.7	-2.61733	2	0
									SLNNQFASFIDK	9.84e-05	1382.68	1382.68	-2.08363	2	0
									SLDLDSIIAEVK	9.89e-05	1301.71	1301.7	-2.42988	2	0
									LNDLEDALQQAK	0.0001	1356.69	1356.69	-2.56286	2	0
									DVDGAYMTK	0.000106	1014.43	1014.43	-2.97112	2	0	DVDGAYM[147]TK
									TLLEGEESR	0.000106	1032.51	1032.51	-3.06535	2	0
									SKAEAESLYQSK	0.000106	1339.66	1339.66	-2.36851	2	1
									SLNNQFASFIDK	0.000106	1382.68	1382.68	-2.7895	2	0
									SLNNQFASFIDK	0.000107	1382.68	1382.68	-1.37703	2	0
									TLLEGEESR	0.000108	1032.51	1032.51	-1.52832	2	0
									YEELQITAGR	0.000109	1178.59	1178.59	-1.58664	2	0
									SLDLDSIIAEVK	0.000109	1301.71	1301.7	-2.80478	2	0
									TLLEGEESR	0.000112	1032.51	1032.51	-2.23824	2	0
									SKAEAESLYQSK	0.000114	1339.66	1339.66	-0.81961	2	1
									SLDLDSIIAEVK	0.000115	1301.71	1301.7	-2.24244	2	0
									TLLEGEESR	0.000118	1032.51	1032.51	-1.52832	2	0
									SLDLDSIIAEVK	0.00012	1301.71	1301.7	-2.24244	2	0
									LNDLEDALQQAK	0.000125	1356.69	1356.69	-2.29308	2	0
									SLNNQFASFIDK	0.000126	1382.68	1382.68	-3.14316	2	0
									LNDLEDALQQAK	0.00013	1356.69	1356.69	-2.11323	2	0
									YEELQITAGR	0.000132	1178.59	1178.59	-0.550657	2	0
									SLDLDSIIAEVK	0.000135	1301.71	1301.7	-2.24244	2	0
									SLDLDSIIAEVK	0.000137	1301.71	1301.7	-3.27339	2	0
									YEELQITAGR	0.000137	1178.59	1178.59	-1.06907	2	0
									SLDLDSIIAEVK	0.00014	1301.71	1301.71	-1.9605	2	0
									SLDLDSIIAEVK	0.000142	1301.71	1301.71	-1.58561	2	0
									SLDLDSIIAEVK	0.000143	1301.71	1301.7	-3.17967	2	0
									SLNNQFASFIDK	0.000146	1382.68	1382.68	-1.37703	2	0
									TNAENEFVTIKK	0.00015	1392.72	1392.72	-2.50301	2	1
									DVDGAYMTK	0.000151	1014.43	1014.43	-2.06815	2	0	DVDGAYM[147]TK
									SLNNQFASFIDK	0.000153	1382.68	1382.68	-3.4961	2	0
									DVDGAYMTK	0.000157	1014.43	1014.43	-2.97112	2	0	DVDGAYM[147]TK
									SLDLDSIIAEVK	0.000157	1301.71	1301.7	-6.08662	2	0
									DVDGAYMTK	0.00016	1014.43	1014.43	-2.49006	2	0	DVDGAYM[147]TK
									YEELQITAGR	0.000162	1178.59	1178.59	-1.58664	2	0
									SLDLDSIIAEVK	0.000162	1301.71	1301.7	-2.24244	2	0
									TNAENEFVTIKK	0.000163	1392.72	1392.72	-2.50301	2	1
									SLDLDSIIAEVK	0.000163	1301.71	1301.7	-3.17967	2	0
									YEELQITAGR	0.000167	1178.59	1178.59	-1.79366	2	0
									TLLEGEESR	0.000174	1032.51	1032.51	-0.228569	2	0
									LNDLEDALQQAK	0.000176	1356.69	1356.69	-1.84272	2	0
									LNDLEDALQQAK	0.00018	1356.69	1356.68	-3.46284	2	0
									YEELQITAGR	0.000187	1178.59	1178.59	-1.06907	2	0
									SLNNQFASFIDK	0.000192	1382.68	1382.68	-2.43657	2	0
									SLDLDSIIAEVK	0.000201	1301.71	1301.71	-2.14795	2	0
									SLNNQFASFIDK	0.000207	1382.68	1382.68	-2.43657	2	0
									YEELQITAGR	0.000207	1178.59	1178.59	-1.48312	2	0
									TLLEGEESR	0.000212	1032.51	1032.51	0.00774812	2	0
									YEELQITAGR	0.000214	1178.59	1178.59	-1.79366	2	0
									SLDLDSIIAEVK	0.000216	1301.71	1301.71	2.25934	2	0
									SLDLDSIIAEVK	0.000217	1301.71	1301.7	-3.8365	2	0
									SLDLDSIIAEVK	0.000222	1301.71	1301.7	-2.80478	2	0
									SLDLDSIIAEVK	0.000229	1301.71	1301.71	-1.49189	2	0
									SLDLDSIIAEVK	0.000232	1301.71	1301.7	-3.08595	2	0
									LNDLEDALQQAK	0.000237	1356.69	1356.68	-3.01248	2	0
									SLDLDSIIAEVK	0.000241	1301.71	1301.71	2.44679	2	0
									SLNNQFASFIDK	0.000242	1382.68	1382.68	-2.17186	2	0
									SLDLDSIIAEVK	0.000245	1301.71	1301.7	-2.71105	2	0
									TLLEGEESR	0.000245	1032.51	1032.51	-1.41016	2	0
									TLLEGEESR	0.000254	1032.51	1032.51	-2.12008	2	0
									TLLEGEESR	0.000255	1032.51	1032.51	0.00774812	2	0
									SKAEAESLYQSK	0.000257	1339.66	1339.66	-1.73103	2	1
									SLDLDSIIAEVK	0.000263	1301.71	1301.7	-2.61733	2	0
									SKAEAESLYQSK	0.000265	1339.66	1339.66	-2.0953	2	1
									TLLEGEESR	0.000266	1032.51	1032.51	-0.110411	2	0
									TLLEGEESR	0.000273	1032.51	1032.51	-1.88376	2	0
									TLLEGEESR	0.000287	1032.51	1032.51	1.30846	2	0
									SLDLDSIIAEVK	0.000302	1301.71	1301.7	-2.24244	2	0
									LNDLEDALQQAK	0.000302	1356.69	1356.68	-3.46284	2	0
									TLLEGEESR	0.000327	1032.51	1032.51	-1.88376	2	0
									SKAEAESLYQSK	0.000337	1339.66	1339.66	-2.27744	2	1
									LNDLEDALQQAK	0.000339	1356.69	1356.68	-3.19233	2	0
									SLNNQFASFIDK	0.000346	1382.68	1382.68	-2.70127	2	0
									TLLEGEESR	0.000347	1032.51	1032.51	-2.3564	2	0
									SLNNQFASFIDK	0.000351	1382.68	1382.68	-2.08363	2	0
									TLLEGEESR	0.000353	1032.51	1032.51	-1.52832	2	0
									SLDLDSIIAEVK	0.000354	1301.71	1301.71	-1.86678	2	0
									DVDGAYMTK	0.000355	1014.43	1014.43	-3.45218	2	0	DVDGAYM[147]TK
									SLNNQFASFIDK	0.000368	1382.68	1382.68	-2.2601	2	0
									SLNNQFASFIDK	0.000369	1382.68	1382.68	-0.759393	2	0
									TNAENEFVTIKK	0.000374	1392.72	1392.72	-2.06502	2	1
									TNAENEFVTIKK	0.000385	1392.72	1392.72	-1.6579	3	1
									TLLEGEESR	0.000389	1032.51	1032.51	-1.52832	2	0
									SLDLDSIIAEVK	0.000392	1301.71	1301.71	-1.30444	2	0
									SLDLDSIIAEVK	0.000413	1301.71	1301.7	-2.24244	2	0
									SLDLDSIIAEVK	0.000415	1301.71	1301.7	-2.24244	2	0
									SLDLDSIIAEVK	0.000416	1301.71	1301.71	2.44679	2	0
									TLLEGEESR	0.00044	1032.51	1032.51	-1.7656	2	0
									SLDLDSIIAEVK	0.000444	1301.71	1301.7	-2.24244	2	0
									SLDLDSIIAEVK	0.000454	1301.71	1301.7	-2.24244	2	0
									SLDLDSIIAEVK	0.000457	1301.71	1301.7	-3.17967	2	0
									LNDLEDALQQAK	0.000481	1356.69	1356.69	-2.56286	2	0
									TNAENEFVTIKK	0.000515	1392.72	1392.72	-2.3156	3	1
									LNDLEDALQQAK	0.000522	1356.69	1356.68	-3.19233	2	0
									SLNNQFASFIDK	0.000541	1382.68	1382.68	-2.08363	2	0
									TLLEGEESR	0.000561	1032.51	1032.51	-1.17384	2	0
									TLLEGEESR	0.000563	1032.51	1032.51	-1.52832	2	0
									TNAENEFVTIKK	0.000582	1392.72	1392.72	-1.72396	3	1
									TLLEGEESR	0.000695	1032.51	1032.51	-0.110411	2	0
									SLDLDSIIAEVK	0.000707	1301.71	1301.71	-1.58561	2	0
									TLLEGEESR	0.00072	1032.51	1032.51	-0.228569	2	0
									SLDLDSIIAEVK	0.000735	1301.71	1301.7	-6.36856	2	0
									SLDLDSIIAEVK	0.00075	1301.71	1301.7	-2.42988	2	0
									TLLEGEESR	0.000762	1032.51	1032.51	-0.110411	2	0
									TLLEGEESR	0.000763	1032.51	1032.51	-1.52832	2	0
									TNAENEFVTIKK	0.000766	1392.72	1392.72	-2.51234	3	1
									AQYEDIAQK	0.000777	1064.51	1064.51	-2.70452	2	0
									SLDLDSIIAEVK	0.000785	1301.71	1301.71	-1.49189	2	0
									SLDLDSIIAEVK	0.000785	1301.71	1301.7	-3.17967	2	0
									LNDLEDALQQAK	0.000839	1356.69	1356.68	-3.19233	2	0
									DVDGAYMTK	0.000918	1014.43	1014.43	-2.97112	2	0	DVDGAYM[147]TK
									TNAENEFVTIKK	0.000929	1392.72	1392.72	-2.11815	3	1
									SLDLDSIIAEVK	0.000948	1301.71	1301.7	-3.8365	2	0
									SLDLDSIIAEVK	0.000958	1301.71	1301.71	2.25934	2	0
									LNDLEDALQQAK	0.000975	1356.69	1356.69	-2.11323	2	0
									TLLEGEESR	0.001	1032.51	1032.51	-1.17384	2	0
									SKAEAESLYQSK	0.00107	1339.66	1339.66	-2.45958	2	1
									TLLEGEESR	0.00109	1032.51	1032.51	-1.88376	2	0
									AQYEDIAQK	0.00109	1064.51	1064.51	-3.04834	2	0
									TLLEGEESR	0.00112	1032.51	1032.51	-2.12008	2	0
									AQYEDIAQK	0.00117	1064.51	1064.51	-3.04834	2	0
									SLDLDSIIAEVK	0.00117	1301.71	1301.7	-2.61733	2	0
									TLLEGEESR	0.00118	1032.51	1032.51	-1.52832	2	0
									TLLEGEESR	0.00121	1032.51	1032.51	-1.41016	2	0
									SLNNQFASFIDK	0.00126	1382.68	1382.68	-2.17186	2	0
									AQYEDIAQK	0.00129	1064.51	1064.51	-2.93373	2	0
									AQYEDIAQK	0.0013	1064.51	1064.51	-3.04834	2	0
									AQYEDIAQK	0.00133	1064.51	1064.51	-3.16389	2	0
									AQYEDIAQK	0.0014	1064.51	1064.51	-2.81913	2	0
									TNAENEFVTIKK	0.00144	1392.72	1392.72	-2.05209	3	1
									AQYEDIAQK	0.00146	1064.51	1064.51	-3.04834	2	0
									SLNNQFASFIDK	0.00149	1382.68	1382.68	-3.4961	2	0
									LNDLEDALQQAK	0.00153	1356.69	1356.68	-3.01248	2	0
									SKAEAESLYQSK	0.00161	1339.66	1339.66	-1.45708	2	1
									TLLEGEESR	0.00166	1032.51	1032.51	-0.110411	2	0
									SLDLDSIIAEVK	0.00166	1301.71	1301.71	-1.49189	2	0
									TNAENEFVTIKK	0.00166	1392.72	1392.72	-3.63029	3	1
									YEELQITAGR	0.00169	1178.59	1178.59	-1.17258	2	0
									AQYEDIAQK	0.00172	1064.51	1064.51	-2.58991	2	0
									AQYEDIAQK	0.00172	1064.51	1064.51	-3.04834	2	0
									TNAENEFVTIKK	0.00173	1392.72	1392.72	-2.7658	2	1
									AQYEDIAQK	0.00177	1064.51	1064.51	-3.04834	2	0
									TNAENEFVTIKK	0.00189	1392.72	1392.72	-1.7893	3	1
									TLLEGEESR	0.00194	1032.51	1032.51	-2.00192	2	0
									SLNNQFASFIDK	0.00194	1382.68	1382.68	-3.2314	2	0
									AQYEDIAQK	0.00195	1064.51	1064.51	-2.81913	2	0
									AQYEDIAQK	0.00199	1064.51	1064.51	-2.93373	2	0
									TNAENEFVTIKK	0.00204	1392.72	1392.72	-1.9207	3	1
									LNDLEDALQQAK	0.00204	1356.69	1356.69	-2.29308	2	0
									AQYEDIAQK	0.00208	1064.51	1064.51	-2.93373	2	0
									AQYEDIAQK	0.00221	1064.51	1064.51	-2.81913	2	0
									AQYEDIAQK	0.00224	1064.51	1064.51	-1.67306	2	0
									TLLEGEESR	0.00243	1032.51	1032.51	-1.05568	2	0
									SLNNQFASFIDK	0.00244	1382.68	1382.68	-1.20056	2	0
									SLDLDSIIAEVK	0.00249	1301.71	1301.7	-2.33616	2	0
									AQYEDIAQK	0.00251	1064.51	1064.51	-3.27849	2	0
									AQYEDIAQK	0.00254	1064.51	1064.51	-3.16389	2	0
									AQYEDIAQK	0.00255	1064.51	1064.51	-2.58991	2	0
									AQYEDIAQK	0.00264	1064.51	1064.51	-3.16389	2	0
									AQYEDIAQK	0.00265	1064.51	1064.51	-2.81913	2	0
									AQYEDIAQK	0.00265	1064.51	1064.51	-2.81913	2	0
									AQYEDIAQK	0.00271	1064.51	1064.51	-1.78767	2	0
									AQYEDIAQK	0.00276	1064.51	1064.51	-2.93373	2	0
									TNAENEFVTIKK	0.00278	1392.72	1392.72	-2.3156	3	1
									TNAENEFVTIKK	0.00282	1392.72	1392.72	-1.6579	3	1
									AQYEDIAQK	0.00286	1064.51	1064.51	-3.16389	2	0
									AQYEDIAQK	0.00289	1064.51	1064.51	-3.16389	2	0
									AQYEDIAQK	0.00292	1064.51	1064.51	-1.78767	2	0
									AQYEDIAQK	0.00299	1064.51	1064.51	-2.70452	2	0
									TNAENEFVTIKK	0.00302	1392.72	1392.72	-2.05209	3	1
									AQYEDIAQK	0.00304	1064.51	1064.51	-2.93373	2	0
									TNAENEFVTIKK	0.00306	1392.72	1392.72	-2.24955	3	1
									AQYEDIAQK	0.00308	1064.51	1064.51	-2.93373	2	0
									AQYEDIAQK	0.00317	1064.51	1064.51	-1.78767	2	0
									AQYEDIAQK	0.00325	1064.51	1064.51	-2.58991	2	0
									AQYEDIAQK	0.00331	1064.51	1064.51	-1.67306	2	0
									AQYEDIAQK	0.00335	1064.51	1064.51	-3.04834	2	0
									AQYEDIAQK	0.00336	1064.51	1064.51	-3.3931	2	0
									AQYEDIAQK	0.00338	1064.51	1064.51	-3.3931	2	0
									AQYEDIAQK	0.00352	1064.51	1064.51	-2.3607	2	0
									AQYEDIAQK	0.00354	1064.51	1064.51	-3.16389	2	0
									AQYEDIAQK	0.00356	1064.51	1064.51	-2.58991	2	0
									TNAENEFVTIKK	0.00357	1392.72	1392.72	-1.39511	3	1
									SLDLDSIIAEVK	0.00357	1301.71	1301.7	-6.36856	2	0
									AQYEDIAQK	0.0036	1064.51	1064.51	-3.04834	2	0
									AQYEDIAQK	0.00363	1064.51	1064.51	-2.01688	2	0
									TNAENEFVTIKK	0.00365	1392.72	1392.72	-2.05209	3	1
									AQYEDIAQK	0.00366	1064.51	1064.51	-3.16389	2	0
									AQYEDIAQK	0.00372	1064.51	1064.51	-2.3607	2	0
									AQYEDIAQK	0.00373	1064.51	1064.51	-3.04834	2	0
									TLLEGEESR	0.0038	1032.51	1032.51	-1.7656	2	0
									AQYEDIAQK	0.00385	1064.51	1064.51	-2.93373	2	0
									AQYEDIAQK	0.00396	1064.51	1064.51	-1.55846	2	0
									SKAEAESLYQSK	0.004	1339.66	1339.66	-1.09281	2	1
									TNAENEFVTIKK	0.00401	1392.72	1392.72	-2.5784	3	1
									AQYEDIAQK	0.00405	1064.51	1064.51	-3.16389	2	0
									AQYEDIAQK	0.00405	1064.51	1064.51	-2.93373	2	0
									AQYEDIAQK	0.00416	1064.51	1064.51	-3.16389	2	0
									AQYEDIAQK	0.00418	1064.51	1064.51	-1.78767	2	0
									TNAENEFVTIKK	0.00425	1392.72	1392.72	-1.5265	3	1
									AQYEDIAQK	0.00426	1064.51	1064.51	-3.27849	2	0
									TNAENEFVTIKK	0.00426	1392.72	1392.72	-1.46045	3	1
									TNAENEFVTIKK	0.00433	1392.72	1392.72	-1.5265	3	1
									AQYEDIAQK	0.00438	1064.51	1064.51	-2.70452	2	0
									LNDLEDALQQAK	0.00471	1356.69	1356.68	-3.64269	2	0
									AQYEDIAQK	0.00477	1064.51	1064.51	-3.27849	2	0
									NKYEDEINKR	0.00507	1307.65	1307.64	-2.55574	3	2
									DYQELMNTK	0.00534	1156.51	1156.5	-2.19195	2	0	DYQELM[147]NTK
									AQYEDIAQK	0.00544	1064.51	1064.51	-2.01688	2	0
									TLLEGEESR	0.00554	1032.51	1032.51	-2.00192	2	0
									AQYEDIAQK	0.00567	1064.51	1064.51	-1.55846	2	0
									AQYEDIAQK	0.00575	1064.51	1064.51	-2.58991	2	0
									AQYEDIAQK	0.00584	1064.51	1064.51	-2.13149	2	0
									AQYEDIAQK	0.00592	1064.51	1064.51	-3.04834	2	0
									AQYEDIAQK	0.00648	1064.51	1064.51	-2.13149	2	0
									AQYEDIAQK	0.00685	1064.51	1064.51	-2.3607	2	0
									TNAENEFVTIKK	0.00717	1392.72	1392.72	-1.72396	3	1
									AQYEDIAQK	0.00785	1064.51	1064.51	-1.78767	2	0
									TNAENEFVTIKK	0.00789	1392.72	1392.72	-2.11815	3	1
									AQYEDIAQK	0.0089	1064.51	1064.51	-2.3607	2	0
									AQYEDIAQK	0.00892	1064.51	1064.51	-1.90228	2	0
									TNAENEFVTIKK	0.0091	1392.72	1392.72	-1.5265	3	1
									TNAENEFVTIKK	0.0106	1392.72	1392.72	-2.5784	3	1
									TNAENEFVTIKK	0.0107	1392.72	1392.72	-1.39511	3	1
									LRSEIDNVKK	0.0108	1200.68	1200.68	-2.41279	3	2
									DYQELMNTK	0.0108	1156.51	1156.5	-1.76998	2	0	DYQELM[147]NTK
									LRSEIDNVKK	0.0111	1200.68	1200.68	-2.18376	3	2
									TNAENEFVTIKK	0.0119	1392.72	1392.72	-1.98675	3	1
									TNAENEFVTIKK	0.0123	1392.72	1392.72	-2.5784	3	1
									AQYEDIAQK	0.0141	1064.51	1064.51	-2.3607	2	0
									TNAENEFVTIKK	0.0144	1392.72	1392.72	-2.51234	3	1
									AQYEDIAQK	0.0145	1064.51	1064.51	-2.70452	2	0
									NKYEDEINKR	0.0151	1307.65	1307.64	-2.62609	3	2
									TNAENEFVTIKK	0.0152	1392.72	1392.72	-1.9207	3	1
									TNAENEFVTIKK	0.0161	1392.72	1392.72	-1.19765	3	1
									AQYEDIAQK	0.0163	1064.51	1064.51	-2.13149	2	0
									AQYEDIAQK	0.0163	1064.51	1064.51	-2.01688	2	0
									TNAENEFVTIKK	0.0165	1392.72	1392.72	-1.7893	3	1
									TNAENEFVTIKK	0.0179	1392.72	1392.72	-2.5784	3	1
									TLLEGEESR	0.0184	1032.51	1032.51	-2.23824	2	0
									NKYEDEINKR	0.0185	1307.65	1307.64	-3.53612	3	2
									TNAENEFVTIKK	0.0185	1392.72	1392.72	-2.11815	3	1
									NKYEDEINKR	0.0189	1307.65	1307.64	-2.69568	3	2
									TNAENEFVTIKK	0.019	1392.72	1392.72	-1.46045	3	1
									AQYEDIAQK	0.0211	1064.51	1064.51	-0.296849	2	0
									TNAENEFVTIKK	0.022	1392.72	1392.72	-3.30144	3	1
									LRSEIDNVKK	0.023	1200.68	1200.68	-4.20594	2	2
									LRSEIDNVKK	0.0231	1200.68	1200.68	-4.01355	3	2
									LRSEIDNVKK	0.0235	1200.68	1200.68	-0.658792	3	2
									TNAENEFVTIKK	0.0286	1392.72	1392.72	-1.5265	3	1
									LRSEIDNVKK	0.0289	1200.68	1200.68	-2.10797	3	2
									TNAENEFVTIKK	0.0341	1392.72	1392.72	-1.98675	3	1
									NKYEDEINKR	0.0345	1307.65	1307.64	-2.27584	3	2
									SLVNLGGSK	0.0426	873.492	873.486	-6.57247	2	0
									LRSEIDNVKK	0.0447	1200.68	1200.68	-3.09907	3	2
									NKYEDEINKR	0.0467	1307.65	1307.64	-2.1359	3	2
									LRSEIDNVKK	0.0474	1200.68	1200.68	-2.18376	3	2
	P35908.2	-	Homo sapiens	Keratin, type II cytoskeletal 2 epidermal	65432.1	8.07353	12	19.0923	GFSSGSAVVSGGSR	1.24e-07	1253.6	1253.6	-1.71905	2	0
									GFSSGSAVVSGGSR	1.75e-07	1253.6	1253.6	-1.52441	2	0
									GFSSGSAVVSGGSR	2.22e-07	1253.6	1253.6	-2.59572	2	0
									GFSSGSAVVSGGSR	2.84e-07	1253.6	1253.6	-1.52441	2	0
									GFSSGSAVVSGGSR	3.63e-07	1253.6	1253.6	-2.01101	2	0
									GFSSGSAVVSGGSR	5.04e-07	1253.6	1253.6	-2.20645	2	0
									GFSSGSAVVSGGSR	5.16e-07	1253.6	1253.6	-1.91369	2	0
									GFSSGSAVVSGGSR	5.3e-07	1253.6	1253.6	-2.79036	2	0
									GFSSGSAVVSGGSR	5.65e-07	1253.6	1253.6	-3.08232	2	0
									GFSSGSAVVSGGSR	7.13e-07	1253.6	1253.6	-1.52441	2	0
									GFSSGSAVVSGGSR	7.15e-07	1253.6	1253.6	-2.4984	2	0
									GFSSGSAVVSGGSR	1.25e-06	1253.6	1253.6	-2.4984	2	0
									GGSISGGGYGSGGGK	6.55e-06	1196.54	1196.54	-2.62674	2	0
									LNDLEEALQQAK	9.28e-06	1370.7	1370.7	-3.17793	2	0
									LNDLEEALQQAK	1.03e-05	1370.7	1370.7	-2.6439	2	0
									LNDLEEALQQAK	1.17e-05	1370.7	1370.7	-2.6439	2	0
									LNDLEEALQQAK	1.86e-05	1370.7	1370.7	-2.99992	2	0
									LNDLEEALQQAK	1.92e-05	1370.7	1370.7	-3.35667	2	0
									LNDLEEALQQAK	2.25e-05	1370.7	1370.7	-3.26766	2	0
									LNDLEEALQQAK	2.82e-05	1370.7	1370.7	-3.62368	2	0
									NLDLDSIIAEVK	2.95e-05	1328.72	1328.71	-4.24394	2	0
									LNDLEEALQQAK	3.13e-05	1370.7	1370.7	-2.99992	2	0
									LNDLEEALQQAK	3.28e-05	1370.7	1370.7	-2.6439	2	0
									LNDLEEALQQAK	4.17e-05	1370.7	1370.7	-3.44567	2	0
									LNDLEEALQQAK	4.2e-05	1370.7	1370.7	-2.7329	2	0
									NLDLDSIIAEVK	4.21e-05	1328.72	1328.72	-2.68228	2	0
									TAAENDFVTLK	5.31e-05	1207.61	1207.61	-0.989559	2	0
									LNDLEEALQQAK	5.95e-05	1370.7	1370.7	-3.26766	2	0
									NLDLDSIIAEVK	6.09e-05	1328.72	1328.72	-2.31426	2	0
									NLDLDSIIAEVK	6.17e-05	1328.72	1328.72	-0.660787	2	0
									LNDLEEALQQAK	6.45e-05	1370.7	1370.7	-3.26766	2	0
									LNDLEEALQQAK	6.85e-05	1370.7	1370.7	-3.26766	2	0
									VDLLNQEIEFLK	6.94e-05	1459.79	1459.78	-6.54751	2	0
									VDLLNQEIEFLK	7.14e-05	1459.79	1459.79	-4.37323	2	0
									NLDLDSIIAEVK	7.18e-05	1328.72	1328.71	-4.51939	2	0
									LNDLEEALQQAK	7.25e-05	1370.7	1370.7	-2.46589	2	0
									NLDLDSIIAEVK	7.37e-05	1328.72	1328.72	-1.21169	2	0
									LNDLEEALQQAK	7.44e-05	1370.7	1370.7	-3.44567	2	0
									LNDLEEALQQAK	7.61e-05	1370.7	1370.7	-3.26766	2	0
									VDLLNQEIEFLK	7.64e-05	1459.79	1459.78	-5.37679	2	0
									LNDLEEALQQAK	8.16e-05	1370.7	1370.7	-3.35667	2	0
									YEELQVTVGR	8.46e-05	1192.61	1192.61	-0.872038	2	0
									NLDLDSIIAEVK	8.53e-05	1328.72	1328.72	-0.568969	2	0
									NLDLDSIIAEVK	8.74e-05	1328.72	1328.72	-1.39608	2	0
									LNDLEEALQQAK	8.8e-05	1370.7	1370.7	-2.6439	2	0
									LNDLEEALQQAK	9.19e-05	1370.7	1370.7	-3.17793	2	0
									TAAENDFVTLK	0.0001	1207.61	1207.61	-0.686481	2	0
									LNDLEEALQQAK	0.000104	1370.7	1370.7	-2.7329	2	0
									NLDLDSIIAEVK	0.000105	1328.72	1328.72	-2.59047	2	0
									VDLLNQEIEFLK	0.000116	1459.79	1459.79	-2.86822	2	0
									LNDLEEALQQAK	0.000118	1370.7	1370.7	-2.6439	2	0
									GGSISGGGYGSGGGK	0.000119	1196.54	1196.54	-2.52478	2	0
									LNDLEEALQQAK	0.000122	1370.7	1370.7	-3.26766	2	0
									TAAENDFVTLK	0.000124	1207.61	1207.61	-1.19161	2	0
									LNDLEEALQQAK	0.000137	1370.7	1370.7	-3.62368	2	0
									NLDLDSIIAEVK	0.000138	1328.72	1328.72	-1.21169	2	0
									LNDLEEALQQAK	0.00014	1370.7	1370.7	-4.60347	2	0
									VDLLNQEIEFLK	0.00015	1459.79	1459.78	-5.20965	2	0
									NLDLDSIIAEVK	0.00015	1328.72	1328.72	-2.31426	2	0
									TAAENDFVTLK	0.00015	1207.61	1207.61	-2.30373	2	0
									GFSSGSAVVSGGSR	0.000153	1253.6	1253.6	-2.20645	2	0
									NLDLDSIIAEVK	0.000163	1328.72	1328.72	-2.59047	2	0
									NLDLDSIIAEVK	0.000164	1328.72	1328.72	-2.59047	2	0
									NLDLDSIIAEVK	0.000165	1328.72	1328.72	0.258143	2	0
									TAAENDFVTLK	0.000216	1207.61	1207.61	-0.686481	2	0
									NLDLDSIIAEVK	0.000247	1328.72	1328.72	-2.31426	2	0
									GGSISGGGYGSGGGK	0.000247	1196.54	1196.54	-3.03458	2	0
									NLDLDSIIAEVK	0.000295	1328.72	1328.72	-2.68228	2	0
									TAAENDFVTLK	0.000312	1207.61	1207.61	-1.19161	2	0
									TAAENDFVTLK	0.00035	1207.61	1207.61	-0.686481	2	0
									NLDLDSIIAEVK	0.000361	1328.72	1328.71	-3.7841	2	0
									NLDLDSIIAEVK	0.000363	1328.72	1328.71	-3.41683	2	0
									NLDLDSIIAEVK	0.00037	1328.72	1328.71	-4.51939	2	0
									NLDLDSIIAEVK	0.000378	1328.72	1328.71	-3.41683	2	0
									NLDLDSIIAEVK	0.00038	1328.72	1328.72	-2.13062	2	0
									VDLLNQEIEFLK	0.000417	1459.79	1459.79	-3.20251	2	0
									TAAENDFVTLK	0.000476	1207.61	1207.61	-2.30373	2	0
									TAAENDFVTLK	0.00048	1207.61	1207.61	-1.79777	2	0
									TAAENDFVTLK	0.000604	1207.61	1207.61	-1.49469	2	0
									TAAENDFVTLK	0.000654	1207.61	1207.61	-1.49469	2	0
									NLDLDSIIAEVK	0.000743	1328.72	1328.72	-0.660787	2	0
									TAAENDFVTLK	0.000778	1207.61	1207.61	-1.99982	2	0
									YLDGLTAER	0.000813	1036.52	1036.52	-2.38491	2	0
									TAAENDFVTLK	0.000821	1207.61	1207.61	-1.99982	2	0
									TAAENDFVTLK	0.000822	1207.61	1207.61	-0.686481	2	0
									VDLLNQEIEFLK	0.000844	1459.79	1459.79	-3.03536	2	0
									VDLLNQEIEFLK	0.000882	1459.79	1459.79	-2.28252	2	0
									NLDLDSIIAEVK	0.000896	1328.72	1328.72	-1.76335	2	0
									TAAENDFVTLK	0.000957	1207.61	1207.61	-1.99982	2	0
									YLDGLTAER	0.000982	1036.52	1036.52	-1.6787	2	0
									TAAENDFVTLK	0.00102	1207.61	1207.61	-1.39366	2	0
									YLDGLTAER	0.00103	1036.52	1036.52	-2.1495	2	0
									TAAENDFVTLK	0.00103	1207.61	1207.61	-1.79777	2	0
									TAAENDFVTLK	0.00103	1207.61	1207.61	-1.29264	2	0
									VDLLNQEIEFLK	0.00104	1459.79	1459.78	-5.20965	2	0
									TAAENDFVTLK	0.0011	1207.61	1207.61	-2.30373	2	0
									TAAENDFVTLK	0.00113	1207.61	1207.61	-0.989559	2	0
									YLDGLTAER	0.00114	1036.52	1036.52	-1.56099	2	0
									YLDGLTAER	0.00114	1036.52	1036.52	-2.50261	2	0
									NLDLDSIIAEVK	0.00114	1328.72	1328.72	-0.568969	2	0
									VDLLNQEIEFLK	0.00119	1459.79	1459.79	-3.20251	2	0
									VDLLNQEIEFLK	0.00126	1459.79	1459.78	-8.38681	2	0
									TAAENDFVTLK	0.00129	1207.61	1207.61	-1.69674	2	0
									YLDGLTAER	0.0014	1036.52	1036.52	-1.9141	2	0
									YLDGLTAER	0.00145	1036.52	1036.52	-2.38491	2	0
									TAAENDFVTLK	0.00149	1207.61	1207.61	-1.59572	2	0
									NLDLDSIIAEVK	0.00151	1328.72	1328.72	-2.31426	2	0
									TAAENDFVTLK	0.00168	1207.61	1207.61	-1.99982	2	0
									YLDGLTAER	0.00171	1036.52	1036.52	-2.0318	2	0
									YLDGLTAER	0.00174	1036.52	1036.52	-2.1495	2	0
									TAAENDFVTLK	0.00175	1207.61	1207.61	-1.39366	2	0
									TAAENDFVTLK	0.0018	1207.61	1207.61	-1.49469	2	0
									TAAENDFVTLK	0.00186	1207.61	1207.61	-1.49469	2	0
									YLDGLTAER	0.00192	1036.52	1036.52	-1.9141	2	0
									NLDLDSIIAEVK	0.00206	1328.72	1328.72	-0.660787	2	0
									YLDGLTAER	0.00221	1036.52	1036.52	-2.38491	2	0
									YLDGLTAER	0.0023	1036.52	1036.52	-2.2672	2	0
									YLDGLTAER	0.00234	1036.52	1036.52	-1.9141	2	0
									IEISELNR	0.00266	972.524	972.522	-1.62053	2	0
									NLDLDSIIAEVK	0.00289	1328.72	1328.72	-2.13062	2	0
									VDLLNQEIEFLK	0.00303	1459.79	1459.79	-3.20251	2	0
									VDLLNQEIEFLK	0.00322	1459.79	1459.79	-0.191808	2	0
									IEISELNR	0.00348	972.524	972.522	-1.87142	2	0
									IEISELNR	0.00351	972.524	972.522	-1.93414	2	0
									NLDLDSIIAEVK	0.00351	1328.72	1328.72	-1.39608	2	0
									TAAENDFVTLKK	0.00356	1335.7	1335.7	-2.58965	3	1
									NLDLDSIIAEVK	0.00385	1328.72	1328.72	-1.30426	2	0
									YLDGLTAER	0.00394	1036.52	1036.52	-2.38491	2	0
									YLDGLTAER	0.00396	1036.52	1036.52	-2.2672	2	0
									IEISELNR	0.00398	972.524	972.522	-1.8087	2	0
									IEISELNR	0.0041	972.524	972.522	-2.56138	2	0
									IEISELNR	0.00416	972.524	972.522	-2.31048	2	0
									YLDGLTAER	0.00416	1036.52	1036.52	-1.7964	2	0
									IEISELNR	0.00433	972.524	972.522	-1.8087	2	0
									LQGEIAHVK	0.00436	993.561	993.558	-2.4226	2	0
									SLVGLGGTK	0.0044	830.486	830.484	-2.26494	2	0
									TAAENDFVTLK	0.00445	1207.61	1207.61	-2.30373	2	0
									YLDGLTAER	0.00467	1036.52	1036.52	-2.1495	2	0
									IEISELNR	0.00502	972.524	972.522	-1.93414	2	0
									YLDGLTAER	0.00552	1036.52	1036.52	-1.7964	2	0
									IEISELNR	0.00555	972.524	972.522	-2.12231	2	0
									IEISELNR	0.00589	972.524	972.523	-1.11771	2	0
									IEISELNR	0.00606	972.524	972.523	-0.92954	2	0
									IEISELNR	0.00635	972.524	972.522	-1.5578	2	0
									IEISELNR	0.00702	972.524	972.522	-1.5578	2	0
									IEISELNR	0.00726	972.524	972.522	-1.87142	2	0
									LQGEIAHVK	0.00742	993.561	993.558	-2.97516	2	0
									SLVGLGGTK	0.00748	830.486	830.485	-1.16197	2	0
									IEISELNR	0.00785	972.524	972.522	-1.74597	2	0
									IEISELNR	0.00808	972.524	972.522	-1.74597	2	0
									IEISELNR	0.00829	972.524	972.522	-1.68325	2	0
									IEISELNR	0.00832	972.524	972.522	-1.68325	2	0
									IEISELNR	0.00844	972.524	972.522	-2.31048	2	0
									TAAENDFVTLKK	0.0085	1335.7	1335.7	-1.42397	3	1
									SLVGLGGTK	0.00904	830.486	830.486	-0.0602057	2	0
									IEISELNR	0.00972	972.524	972.522	-1.93414	2	0
									SLVGLGGTK	0.0101	830.486	830.484	-2.04338	2	0
									IEISELNR	0.0102	972.524	972.522	-1.8087	2	0
									VDLLNQEIEFLK	0.0104	1459.79	1459.78	-5.37679	2	0
									IEISELNR	0.0114	972.524	972.522	-1.8087	2	0
									IEISELNR	0.0115	972.524	972.522	-1.5578	2	0
									IEISELNR	0.0117	972.524	972.522	-1.87142	2	0
									IEISELNR	0.0118	972.524	972.522	-1.62053	2	0
									TAAENDFVTLKK	0.0126	1335.7	1335.7	-2.10975	3	1
									SLVGLGGTK	0.0132	830.486	830.484	-2.04338	2	0
									SLVGLGGTK	0.0134	830.486	830.486	-0.0602057	2	0
									TAAENDFVTLK	0.0147	1207.61	1207.61	-0.584627	2	0
									LQGEIAHVK	0.0154	993.561	993.558	-2.85237	2	0
									IEISELNR	0.0155	972.524	972.522	-1.87142	2	0
									TAAENDFVTLKK	0.0181	1335.7	1335.7	-2.79478	3	1
									IEISELNR	0.0183	972.524	972.522	-1.62053	2	0
									IEISELNR	0.0187	972.524	972.522	-1.87142	2	0
									SLVGLGGTK	0.0189	830.486	830.484	-2.41184	2	0
									LQGEIAHVK	0.019	993.561	993.559	-2.17702	2	0
									TAAENDFVTLKK	0.019	1335.7	1335.7	-2.31489	3	1
									SLVGLGGTK	0.019	830.486	830.486	-0.133657	2	0
									IEISELNR	0.0205	972.524	972.522	-2.56138	2	0
									IEISELNR	0.0216	972.524	972.522	-1.87142	2	0
									TAAENDFVTLKK	0.0233	1335.7	1335.7	-1.62985	3	1
									LQGEIAHVK	0.0303	993.561	993.558	-2.66818	2	0
									IEISELNR	0.0314	972.524	972.522	-1.93414	2	0
									IEISELNR	0.0381	972.524	972.522	-1.93414	2	0
									IEISELNR	0.0447	972.524	972.522	-1.5578	2	0
	P35527.3	-	Homo sapiens	Keratin, type I cytoskeletal 9	62063.6	5.13619	10	19.7432	GGSGGSYGGGGSGGGYGGGSGSR	8.66e-10	1790.72	1790.71	-3.40757	2	0
									GGSGGSYGGGGSGGGYGGGSGSR	1.19e-09	1790.72	1790.72	-0.748861	2	0
									GGSGGSYGGGGSGGGYGGGSGSR	2.43e-09	1790.72	1790.71	-3.95316	2	0
									GGSGGSYGGGGSGGGYGGGSGSR	2.17e-08	1790.72	1790.72	-0.0675706	2	0
									GGSGGSYGGGGSGGGYGGGSGSR	4.72e-08	1790.72	1790.72	-2.86254	2	0
									GGSGGSYGGGGSGGGYGGGSGSR	7.31e-08	1790.72	1790.72	1.02305	2	0
									GGSGGSYGGGGSGGGYGGGSGSR	7.34e-08	1790.72	1790.72	-0.748861	2	0
									GGSGGSYGGGGSGGGYGGGSGSR	9.45e-08	1790.72	1790.71	-4.22567	2	0
									GGSGGSYGGGGSGGGYGGGSGSR	2.01e-07	1790.72	1790.72	-2.86254	2	0
									FSSSSGYGGGSSR	7.15e-07	1234.52	1234.52	-2.1644	2	0
									SGGGGGGGLGSGGSIR	1.12e-06	1231.59	1231.59	-1.56708	2	0
									FSSSSGYGGGSSR	1.16e-06	1234.52	1234.52	-1.86793	2	0
									SGGGGGGGLGSGGSIR	1.37e-06	1231.59	1231.59	-1.7652	2	0
									SGGGGGGGLGSGGSIR	1.47e-06	1231.59	1231.59	-1.56708	2	0
									FSSSSGYGGGSSR	1.64e-06	1234.52	1234.52	-1.86793	2	0
									FSSSSGYGGGSSR	1.7e-06	1234.52	1234.52	-1.86793	2	0
									SGGGGGGGLGSGGSIR	2.41e-06	1231.59	1231.59	-1.56708	2	0
									SGGGGGGGLGSGGSIR	2.45e-06	1231.59	1231.59	-1.56708	2	0
									SGGGGGGGLGSGGSIR	2.56e-06	1231.59	1231.59	-0.872855	2	0
									FSSSSGYGGGSSR	3.06e-06	1234.52	1234.52	-2.1644	2	0
									SGGGGGGGLGSGGSIR	3.14e-06	1231.59	1231.59	-0.971914	2	0
									SGGGGGGGLGSGGSIR	3.26e-06	1231.59	1231.59	-1.56708	2	0
									FSSSSGYGGGSSR	4.34e-06	1234.52	1234.52	-1.7683	2	0
									FSSSSGYGGGSSR	4.46e-06	1234.52	1234.52	-1.96675	2	0
									FSSSSGYGGGSSR	4.59e-06	1234.52	1234.52	-2.36205	2	0
									FSSSSGYGGGSSR	4.76e-06	1234.52	1234.52	-2.36205	2	0
									FSSSSGYGGGSSR	5.03e-06	1234.52	1234.52	-1.86793	2	0
									SGGGGGGGLGSGGSIR	5.1e-06	1231.59	1231.59	-1.07097	2	0
									FSSSSGYGGGSSR	5.14e-06	1234.52	1234.52	-2.65852	2	0
									FSSSSGYGGGSSR	6.07e-06	1234.52	1234.52	-2.1644	2	0
									SGGGGGGGLGSGGSIR	6.11e-06	1231.59	1231.59	-1.56708	2	0
									FSSSSGYGGGSSR	6.37e-06	1234.52	1234.52	-2.75734	2	0
									FSSSSGYGGGSSR	6.98e-06	1234.52	1234.52	-2.1644	2	0
									SGGGGGGGLGSGGSIR	7.1e-06	1231.59	1231.59	-0.872855	2	0
									FSSSSGYGGGSSR	7.26e-06	1234.52	1234.52	-2.1644	2	0
									SGGGGGGGLGSGGSIR	7.4e-06	1231.59	1231.59	-2.26049	2	0
									SGGGGGGGLGSGGSIR	7.54e-06	1231.59	1231.59	-0.971914	2	0
									SGGGGGGGLGSGGSIR	7.59e-06	1231.59	1231.59	-2.26049	2	0
									SGGGGGGGLGSGGSIR	7.79e-06	1231.59	1231.59	-1.56708	2	0
									SGGGGGGGLGSGGSIR	8.07e-06	1231.59	1231.59	-1.56708	2	0
									SGGGGGGGLGSGGSIR	8.15e-06	1231.59	1231.59	-1.56708	2	0
									SGGGGGGGLGSGGSIR	8.19e-06	1231.59	1231.59	-1.96331	2	0
									SGGGGGGGLGSGGSIR	8.39e-06	1231.59	1231.59	-1.56708	2	0
									SGGGGGGGLGSGGSIR	9.38e-06	1231.59	1231.59	-1.96331	2	0
									FSSSSGYGGGSSR	1.02e-05	1234.52	1234.52	-1.7683	2	0
									FSSSSGYGGGSSR	1.1e-05	1234.52	1234.52	-2.1644	2	0
									FSSSSGYGGGSSR	1.23e-05	1234.52	1234.52	-1.57065	2	0
									SGGGGGGGLGSGGSIR	1.3e-05	1231.59	1231.59	-1.56708	2	0
									SGGGGGGGLGSGGSIR	1.33e-05	1231.59	1231.59	-1.7652	2	0
									FSSSSGYGGGSSR	1.43e-05	1234.52	1234.52	-1.86793	2	0
									FSSSSGYGGGSSR	1.43e-05	1234.52	1234.52	-2.75734	2	0
									SGGGGGGGLGSGGSIR	1.45e-05	1231.59	1231.59	-2.26049	2	0
									FSSSSGYGGGSSR	1.45e-05	1234.52	1234.52	-1.57065	2	0
									SGGGGGGGLGSGGSIR	1.45e-05	1231.59	1231.59	-0.971914	2	0
									FSSSSGYGGGSSR	1.55e-05	1234.52	1234.52	-2.65852	2	0
									SGGGGGGGLGSGGSIR	1.79e-05	1231.59	1231.59	-0.971914	2	0
									SGGGGGGGLGSGGSIR	1.84e-05	1231.59	1231.59	-1.46721	2	0
									SGGGGGGGLGSGGSIR	1.98e-05	1231.59	1231.59	-1.7652	2	0
									FSSSSGYGGGSSR	2e-05	1234.52	1234.52	-2.36205	2	0
									SGGGGGGGLGSGGSIR	2.03e-05	1231.59	1231.59	-1.96331	2	0
									SGGGGGGGLGSGGSIR	2.2e-05	1231.59	1231.59	-1.07097	2	0
									SGGGGGGGLGSGGSIR	2.33e-05	1231.59	1231.59	-1.7652	2	0
									FSSSSGYGGGSSR	2.34e-05	1234.52	1234.52	-0.977707	2	0
									FSSSSGYGGGSSR	2.4e-05	1234.52	1234.52	-1.7683	2	0
									SGGGGGGGLGSGGSIR	2.47e-05	1231.59	1231.59	-1.96331	2	0
									SGGGGGGGLGSGGSIR	2.55e-05	1231.59	1231.59	-2.26049	2	0
									FSSSSGYGGGSSR	2.66e-05	1234.52	1234.52	-2.36205	2	0
									FSSSSGYGGGSSR	3.06e-05	1234.52	1234.52	-2.1644	2	0
									FSSSSGYGGGSSR	3.5e-05	1234.52	1234.52	-1.57065	2	0
									SGGGGGGGLGSGGSIR	3.63e-05	1231.59	1231.59	-2.26049	2	0
									SGGGGGGGLGSGGSIR	3.83e-05	1231.59	1231.59	-1.7652	2	0
									SGGGGGGGLGSGGSIR	5.7e-05	1231.59	1231.59	-1.26909	2	0
									SGGGGGGGLGSGGSIR	5.93e-05	1231.59	1231.59	-0.872855	2	0
									TLLDIDNTR	0.000175	1059.56	1059.55	-2.91254	2	0
									TLLDIDNTR	0.000196	1059.56	1059.55	-2.56711	2	0
									TLLDIDNTR	0.000265	1059.56	1059.55	-2.56711	2	0
									TLLDIDNTR	0.000269	1059.56	1059.55	-2.10654	2	0
									TLLDIDNTR	0.000283	1059.56	1059.55	-2.22169	2	0
									TLLDIDNTR	0.000299	1059.56	1059.55	-2.68226	2	0
									TLNDMRQEYEQLIAK	0.000306	1866.91	1866.91	-1.45856	3	1	TLNDM[147]RQEYEQLIAK
									TLLDIDNTR	0.00033	1059.56	1059.55	-2.56711	2	0
									TLLDIDNTR	0.000337	1059.56	1059.55	-2.7974	2	0
									TLNDMRQEYEQLIAK	0.000345	1866.91	1866.91	-1.75262	3	1	TLNDM[147]RQEYEQLIAK
									TLLDIDNTR	0.000368	1059.56	1059.55	-2.56711	2	0
									TLLDIDNTR	0.000371	1059.56	1059.55	-2.56711	2	0
									TLLDIDNTR	0.000406	1059.56	1059.55	-2.56711	2	0
									TLLDIDNTR	0.000408	1059.56	1059.55	-2.45197	2	0
									TLLDIDNTR	0.00042	1059.56	1059.55	-2.68226	2	0
									TLLDIDNTR	0.000424	1059.56	1059.55	-2.45197	2	0
									TLLDIDNTR	0.00046	1059.56	1059.55	-2.33683	2	0
									TLLDIDNTR	0.000462	1059.56	1059.55	-3.02768	2	0
									TLNDMRQEYEQLIAK	0.000491	1866.91	1866.91	-2.53734	3	1	TLNDM[147]RQEYEQLIAK
									TLLDIDNTR	0.000499	1059.56	1059.55	-2.68226	2	0
									TLLDIDNTR	0.00051	1059.56	1059.55	-1.87531	2	0
									TLLDIDNTR	0.000522	1059.56	1059.55	-2.56711	2	0
									TLLDIDNTR	0.000531	1059.56	1059.55	-2.91254	2	0
									TLLDIDNTR	0.00056	1059.56	1059.55	-2.91254	2	0
									TLLDIDNTR	0.000577	1059.56	1059.55	-2.45197	2	0
									TLLDIDNTR	0.000591	1059.56	1059.55	-2.91254	2	0
									TLLDIDNTR	0.000593	1059.56	1059.55	-2.91254	2	0
									TLLDIDNTR	0.000597	1059.56	1059.55	-2.91254	2	0
									TLLDIDNTR	0.000619	1059.56	1059.55	-2.56711	2	0
									TLLDIDNTR	0.000626	1059.56	1059.55	-2.33683	2	0
									TLLDIDNTR	0.000629	1059.56	1059.55	-1.76017	2	0
									TLLDIDNTR	0.000641	1059.56	1059.55	-2.56711	2	0
									TLLDIDNTR	0.000645	1059.56	1059.55	-1.76017	2	0
									TLLDIDNTR	0.000656	1059.56	1059.55	-2.56711	2	0
									TLLDIDNTR	0.000669	1059.56	1059.55	-2.91254	2	0
									TLLDIDNTR	0.000703	1059.56	1059.55	-2.68226	2	0
									TLLDIDNTR	0.000748	1059.56	1059.55	-2.91254	2	0
									TLLDIDNTR	0.00077	1059.56	1059.55	-1.64503	2	0
									TLLDIDNTR	0.000784	1059.56	1059.55	-1.87531	2	0
									TLLDIDNTR	0.000823	1059.56	1059.55	-2.22169	2	0
									TLLDIDNTR	0.000826	1059.56	1059.55	-2.68226	2	0
									QGVDADINGLR	0.000869	1156.58	1156.58	-1.42229	2	0
									TLLDIDNTR	0.000878	1059.56	1059.55	-1.64503	2	0
									TLLDIDNTR	0.000883	1059.56	1059.55	-2.33683	2	0
									QGVDADINGLR	0.000887	1156.58	1156.58	-2.58347	2	0
									TLLDIDNTR	0.000916	1059.56	1059.55	-1.87531	2	0
									TLLDIDNTR	0.000919	1059.56	1059.55	-2.33683	2	0
									TLLDIDNTR	0.000923	1059.56	1059.55	-2.45197	2	0
									TLLDIDNTR	0.000937	1059.56	1059.55	-2.33683	2	0
									TLLDIDNTR	0.000937	1059.56	1059.55	-2.45197	2	0
									TLLDIDNTR	0.000948	1059.56	1059.55	-1.2996	2	0
									TLNDMRQEYEQLIAK	0.00095	1866.91	1866.91	-2.04669	3	1	TLNDM[147]RQEYEQLIAK
									TLLDIDNTR	0.00096	1059.56	1059.55	-2.45197	2	0
									TLLDIDNTR	0.000967	1059.56	1059.55	-2.56711	2	0
									TLLDIDNTR	0.000972	1059.56	1059.55	-2.33683	2	0
									TLLDIDNTR	0.000974	1059.56	1059.55	-1.99046	2	0
									TLLDIDNTR	0.000997	1059.56	1059.55	-3.02768	2	0
									IKFEMEQNLR	0.00103	1322.67	1322.66	-2.29461	3	1	IKFEM[147]EQNLR
									TLLDIDNTR	0.00105	1059.56	1059.55	-1.2996	2	0
									TLLDIDNTR	0.00108	1059.56	1059.55	-2.56711	2	0
									TLLDIDNTR	0.00112	1059.56	1059.55	-2.22169	2	0
									TLLDIDNTR	0.00118	1059.56	1059.55	-1.41474	2	0
									QVLDNLTMEK	0.00126	1205.6	1205.59	-2.53899	2	0	QVLDNLTM[147]EK
									TLLDIDNTR	0.00127	1059.56	1059.55	-1.2996	2	0
									TLLDIDNTR	0.00146	1059.56	1059.55	-1.99046	2	0
									MTLDDFR	0.00159	896.406	896.404	-2.08834	2	0
									TLLDIDNTR	0.00177	1059.56	1059.55	-2.33683	2	0
									TLLDIDNTR	0.00184	1059.56	1059.55	-2.33683	2	0
									TLNDMRQEYEQLIAK	0.00185	1866.91	1866.91	-1.75262	3	1	TLNDM[147]RQEYEQLIAK
									TLNDMRQEYEQLIAK	0.00192	1866.91	1866.91	-1.55658	3	1	TLNDM[147]RQEYEQLIAK
									TLLDIDNTR	0.00206	1059.56	1059.55	-2.56711	2	0
									TLNDMRQEYEQLIAK	0.00219	1866.91	1866.91	-1.06593	3	1	TLNDM[147]RQEYEQLIAK
									TLLDIDNTR	0.00223	1059.56	1059.55	-2.56711	2	0
									TLNDMRQEYEQLIAK	0.00251	1866.91	1866.91	-2.04669	3	1	TLNDM[147]RQEYEQLIAK
									STMQELNSR	0.00406	1064.49	1064.49	-3.11416	2	0
									TLNDMRQEYEQLIAK	0.00416	1866.91	1866.91	-1.55658	3	1	TLNDM[147]RQEYEQLIAK
									TLNDMRQEYEQLIAK	0.00421	1866.91	1866.91	-1.6546	3	1	TLNDM[147]RQEYEQLIAK
									IKFEMEQNLR	0.0047	1322.67	1322.66	-2.84804	3	1	IKFEM[147]EQNLR
									IKFEMEQNLR	0.00502	1322.67	1322.66	-1.87954	3	1	IKFEM[147]EQNLR
									TLLDIDNTR	0.00576	1059.56	1059.55	-3.37311	2	0
									TLNDMRQEYEQLIAK	0.00604	1866.91	1866.91	-1.55658	3	1	TLNDM[147]RQEYEQLIAK
									TLLDIDNTR	0.00665	1059.56	1059.55	-1.99046	2	0
									TLNDMRQEYEQLIAK	0.00692	1866.91	1866.91	-1.16395	3	1	TLNDM[147]RQEYEQLIAK
									TLNDMRQEYEQLIAK	0.00872	1866.91	1866.91	-1.75262	3	1	TLNDM[147]RQEYEQLIAK
									TLNDMRQEYEQLIAK	0.0103	1866.91	1866.91	-2.04669	3	1	TLNDM[147]RQEYEQLIAK
									TLNDMRQEYEQLIAK	0.0115	1866.91	1866.91	-1.75262	3	1	TLNDM[147]RQEYEQLIAK
									TLNDMRQEYEQLIAK	0.0116	1866.91	1866.91	-1.36053	3	1	TLNDM[147]RQEYEQLIAK
									TLNDMRQEYEQLIAK	0.0136	1866.91	1866.91	-0.477794	3	1	TLNDM[147]RQEYEQLIAK
									MTLDDFR	0.0197	896.406	896.404	-2.22444	2	0
									TLNDMRQEYEQLIAK	0.0271	1866.91	1866.91	-1.85065	3	1	TLNDM[147]RQEYEQLIAK
									TLNDMRQEYEQLIAK	0.0316	1866.91	1866.91	-1.85065	3	1	TLNDM[147]RQEYEQLIAK
	P13645.6	-	Homo sapiens	Keratin, type I cytoskeletal 10	58826.4	5.13429	10	16.6096	GSLGGGFSSGGFSGGSFSR	9.84e-08	1706.76	1706.76	-3.00159	2	0
									GSLGGGFSSGGFSGGSFSR	1.34e-07	1706.76	1706.76	-3.85993	2	0
									GSLGGGFSSGGFSGGSFSR	3.18e-07	1706.76	1706.76	-2.07176	2	0
									GSLGGGFSSGGFSGGSFSR	8.64e-07	1706.76	1706.76	-3.00159	2	0
									QSLEASLAETEGR	8.83e-07	1389.67	1389.67	-2.48116	2	0
									GSLGGGFSSGGFSGGSFSR	1.04e-06	1706.76	1706.76	-1.14193	2	0
									GSLGGGFSSGGFSGGSFSR	1.25e-06	1706.76	1706.76	-1.14193	2	0
									GSLGGGFSSGGFSGGSFSR	1.53e-06	1706.76	1706.76	-3.28751	2	0
									GSLGGGFSSGGFSGGSFSR	1.87e-06	1706.76	1706.76	-4.3603	2	0
									QSLEASLAETEGR	1.95e-06	1389.67	1389.67	-2.04149	2	0
									QSLEASLAETEGR	2e-06	1389.67	1389.67	-2.21707	2	0
									QSLEASLAETEGR	2.39e-06	1389.67	1389.67	-2.39265	2	0
									QSLEASLAETEGR	2.42e-06	1389.67	1389.67	-2.65674	2	0
									QSLEASLAETEGR	2.51e-06	1389.67	1389.67	-2.56895	2	0
									GSLGGGFSSGGFSGGSFSR	2.76e-06	1706.76	1706.76	-4.3603	2	0
									SQYEQLAEQNR	2.88e-06	1364.63	1364.63	-2.2387	2	0
									QSLEASLAETEGR	3.82e-06	1389.67	1389.67	-2.65674	2	0
									QSLEASLAETEGR	4e-06	1389.67	1389.67	-2.12928	2	0
									QSLEASLAETEGR	4.31e-06	1389.67	1389.67	-2.21707	2	0
									QSLEASLAETEGR	5.7e-06	1389.67	1389.67	-2.21707	2	0
									GSLGGGFSSGGFSGGSFSR	6.32e-06	1706.76	1706.76	-3.35899	2	0
									QSLEASLAETEGR	7.5e-06	1389.67	1389.67	-2.39265	2	0
									SQYEQLAEQNR	7.57e-06	1364.63	1364.63	-2.1493	2	0
									QSLEASLAETEGR	8.32e-06	1389.67	1389.67	-3.09569	2	0
									QSLEASLAETEGR	8.33e-06	1389.67	1389.67	-2.48116	2	0
									GSLGGGFSSGGFSGGSFSR	8.68e-06	1706.76	1706.76	-2.42916	2	0
									QSLEASLAETEGR	1.01e-05	1389.67	1389.67	-2.48116	2	0
									QSLEASLAETEGR	1.21e-05	1389.67	1389.67	-2.48116	2	0
									QSLEASLAETEGR	1.29e-05	1389.67	1389.67	-1.42695	2	0
									QSLEASLAETEGR	1.38e-05	1389.67	1389.67	-2.30486	2	0
									SLLEGEGSSGGGGR	1.48e-05	1261.59	1261.59	-1.19373	2	0
									QSLEASLAETEGR	1.61e-05	1389.67	1389.67	-1.42695	2	0
									QSLEASLAETEGR	1.91e-05	1389.67	1389.67	-3.09569	2	0
									QSLEASLAETEGR	2.46e-05	1389.67	1389.67	-2.12928	2	0
									SLLEGEGSSGGGGR	3.69e-05	1261.59	1261.59	-1.38714	2	0
									GSLGGGFSSGGFSGGSFSR	4.42e-05	1706.76	1706.76	-2.42916	2	0
									SLLEGEGSSGGGGR	4.65e-05	1261.59	1261.59	-0.806126	2	0
									SLLEGEGSSGGGGR	5.3e-05	1261.59	1261.59	-1.96736	2	0
									GSLGGGFSSGGFSGGSFSR	5.61e-05	1706.76	1706.76	-2.07176	2	0
									SLLEGEGSSGGGGR	5.71e-05	1261.59	1261.59	-1.96736	2	0
									SLLEGEGSSGGGGR	6.62e-05	1261.59	1261.59	-2.06406	2	0
									SLLEGEGSSGGGGR	7.36e-05	1261.59	1261.59	-1.48384	2	0
									QSLEASLAETEGR	7.54e-05	1389.67	1389.67	-2.12928	2	0
									VLDELTLTK	7.98e-05	1030.59	1030.59	-2.83236	2	0
									VLDELTLTK	8.46e-05	1030.59	1030.59	-2.12111	2	0
									SLLEGEGSSGGGGR	9.51e-05	1261.59	1261.59	-1.67725	2	0
									VLDELTLTK	0.000102	1030.59	1030.59	-3.30587	2	0
									VLDELTLTK	0.000107	1030.59	1030.59	-2.23949	2	0
									SLLEGEGSSGGGGR	0.000109	1261.59	1261.59	-1.96736	2	0
									VLDELTLTK	0.000112	1030.59	1030.59	-2.12111	2	0
									VLDELTLTK	0.000113	1030.59	1030.59	-3.06911	2	0
									VLDELTLTK	0.00013	1030.59	1030.59	-2.35884	2	0
									SLLEGEGSSGGGGR	0.000131	1261.59	1261.59	-1.29044	2	0
									VLDELTLTK	0.000131	1030.59	1030.59	-2.47722	2	0
									VLDELTLTK	0.000136	1030.59	1030.59	-2.35884	2	0
									SQYEQLAEQNR	0.000147	1364.63	1364.63	-1.79169	2	0
									VLDELTLTK	0.000153	1030.59	1030.59	-2.47722	2	0
									VLDELTLTK	0.00016	1030.59	1030.59	-2.71398	2	0
									VLDELTLTK	0.000161	1030.59	1030.59	-2.00273	2	0
									VLDELTLTK	0.000162	1030.59	1030.59	-2.83236	2	0
									QSLEASLAETEGR	0.000163	1389.67	1389.67	-2.74453	2	0
									VLDELTLTK	0.000166	1030.59	1030.59	-2.95073	2	0
									VLDELTLTK	0.000166	1030.59	1030.59	-2.5956	2	0
									VLDELTLTK	0.000176	1030.59	1030.59	-2.71398	2	0
									VLDELTLTK	0.00018	1030.59	1030.59	-2.71398	2	0
									VLDELTLTK	0.000181	1030.59	1030.59	-2.5956	2	0
									VLDELTLTK	0.000182	1030.59	1030.59	-3.06911	2	0
									VLDELTLTK	0.000183	1030.59	1030.59	-2.83236	2	0
									VLDELTLTK	0.000184	1030.59	1030.59	-2.83236	2	0
									VLDELTLTK	0.000189	1030.59	1030.59	-2.23949	2	0
									VLDELTLTK	0.000192	1030.59	1030.59	-2.83236	2	0
									VLDELTLTK	0.000196	1030.59	1030.59	-2.83236	2	0
									VLDELTLTK	0.000198	1030.59	1030.59	-2.71398	2	0
									VLDELTLTK	0.000199	1030.59	1030.59	-2.47722	2	0
									SQYEQLAEQNR	0.000203	1364.63	1364.63	-2.68644	2	0
									VLDELTLTK	0.000205	1030.59	1030.59	-2.12111	2	0
									VLDELTLTK	0.000211	1030.59	1030.59	-2.95073	2	0
									VLDELTLTK	0.000211	1030.59	1030.59	-2.83236	2	0
									VLDELTLTK	0.000211	1030.59	1030.59	-2.5956	2	0
									VLDELTLTK	0.000225	1030.59	1030.59	-2.5956	2	0
									VLDELTLTK	0.000226	1030.59	1030.59	-2.00273	2	0
									VLDELTLTK	0.000226	1030.59	1030.59	-2.71398	2	0
									VLDELTLTK	0.000228	1030.59	1030.59	-2.5956	2	0
									VLDELTLTK	0.000229	1030.59	1030.59	-2.95073	2	0
									VLDELTLTK	0.000233	1030.59	1030.59	-2.71398	2	0
									VLDELTLTK	0.000236	1030.59	1030.59	-2.71398	2	0
									VLDELTLTK	0.000236	1030.59	1030.59	-2.12111	2	0
									VLDELTLTK	0.000242	1030.59	1030.59	-2.35884	2	0
									SLLEGEGSSGGGGR	0.00025	1261.59	1261.59	-2.54837	2	0
									VLDELTLTK	0.000252	1030.59	1030.59	-2.95073	2	0
									VLDELTLTK	0.000254	1030.59	1030.59	-2.47722	2	0
									VLDELTLTK	0.000254	1030.59	1030.59	-2.23949	2	0
									SQYEQLAEQNR	0.000255	1364.63	1364.63	-1.61289	2	0
									VLDELTLTK	0.000264	1030.59	1030.59	-2.83236	2	0
									VLDELTLTK	0.000265	1030.59	1030.59	-3.30587	2	0
									VLDELTLTK	0.00027	1030.59	1030.59	-2.5956	2	0
									SQYEQLAEQNR	0.000297	1364.63	1364.63	-2.3281	2	0
									VLDELTLTK	0.000303	1030.59	1030.59	-2.83236	2	0
									VLDELTLTK	0.000307	1030.59	1030.59	-3.06911	2	0
									VLDELTLTK	0.000311	1030.59	1030.59	-2.71398	2	0
									VLDELTLTK	0.000312	1030.59	1030.59	-2.47722	2	0
									SQYEQLAEQNR	0.000321	1364.63	1364.63	-2.1493	2	0
									VLDELTLTK	0.000323	1030.59	1030.59	-2.83236	2	0
									VLDELTLTK	0.000325	1030.59	1030.59	-2.5956	2	0
									SQYEQLAEQNR	0.000328	1364.63	1364.63	-2.5069	2	0
									VLDELTLTK	0.000344	1030.59	1030.59	-2.71398	2	0
									LKYENEVALR	0.000349	1233.67	1233.67	-3.08672	3	1
									VLDELTLTK	0.000357	1030.59	1030.59	-2.95073	2	0
									VLDELTLTK	0.000358	1030.59	1030.59	-2.47722	2	0
									VLDELTLTK	0.000364	1030.59	1030.59	-2.5956	2	0
									LKYENEVALR	0.000364	1233.67	1233.67	-2.93838	3	1
									VLDELTLTK	0.000371	1030.59	1030.59	-2.95073	2	0
									VLDELTLTK	0.000437	1030.59	1030.59	-2.12111	2	0
									SQYEQLAEQNR	0.000469	1364.63	1364.63	-1.61289	2	0
									LKYENEVALR	0.000481	1233.67	1233.67	-2.04755	3	1
									VLDELTLTK	0.000514	1030.59	1030.59	-2.35884	2	0
									LENEIQTYR	0.000584	1164.58	1164.57	-2.31758	2	0
									SQYEQLAEQNR	0.000626	1364.63	1364.63	-1.97049	2	0
									VLDELTLTK	0.000634	1030.59	1030.59	-2.83236	2	0
									VLDELTLTK	0.00064	1030.59	1030.59	-2.5956	2	0
									LENEIQTYR	0.000657	1164.58	1164.57	-2.21282	2	0
									LENEIQTYR	0.000661	1164.58	1164.57	-2.4232	2	0
									VLDELTLTK	0.000689	1030.59	1030.59	-2.95073	2	0
									LKYENEVALR	0.000695	1233.67	1233.67	-2.04755	3	1
									VLDELTLTK	0.000721	1030.59	1030.59	-2.5956	2	0
									VLDELTLTK	0.000776	1030.59	1030.59	-2.95073	2	0
									LKYENEVALR	0.000893	1233.67	1233.67	-2.71547	3	1
									QSVEADINGLR	0.000921	1200.61	1200.61	-1.95567	2	0
									LENEIQTYR	0.000969	1164.58	1164.58	-1.06047	2	0
									VLDELTLTK	0.00108	1030.59	1030.59	-1.76598	2	0
									QSVEADINGLR	0.00111	1200.61	1200.61	-1.14192	2	0
									LENEIQTYR	0.00115	1164.58	1164.57	-2.4232	2	0
									QSVEADINGLR	0.00122	1200.61	1200.61	-2.26052	2	0
									QSVEADINGLR	0.00123	1200.61	1200.61	-1.75161	2	0
									VLDELTLTK	0.00125	1030.59	1030.59	-2.83236	2	0
									LENEIQTYR	0.00127	1164.58	1164.57	-2.31758	2	0
									SLLEGEGSSGGGGR	0.00127	1261.59	1261.59	-1.19373	2	0
									VLDELTLTK	0.00127	1030.59	1030.59	-2.35884	2	0
									QSVEADINGLR	0.00146	1200.61	1200.61	-1.85406	2	0
									LKYENEVALR	0.00147	1233.67	1233.67	-2.04755	3	1
									LENEIQTYR	0.00152	1164.58	1164.57	-2.73747	2	0
									YENEVALR	0.0017	992.493	992.491	-2.0907	2	0
									LENEIQTYR	0.00175	1164.58	1164.58	-2.10806	2	0
									LKYENEVALR	0.00177	1233.67	1233.67	-3.3834	3	1
									LENEIQTYR	0.00184	1164.58	1164.57	-2.52796	2	0
									QSVEADINGLR	0.00185	1200.61	1200.61	-2.05729	2	0
									VLDELTLTK	0.00186	1030.59	1030.59	-2.5956	2	0
									LENEIQTYR	0.0019	1164.58	1164.58	-1.79378	2	0
									YENEVALR	0.00192	992.493	992.491	-1.96777	2	0
									QSVEADINGLR	0.00194	1200.61	1200.61	-0.837075	2	0
									YENEVALR	0.00212	992.493	992.491	-2.15216	2	0
									LENEIQTYR	0.00218	1164.58	1164.57	-2.63271	2	0
									LENEIQTYR	0.00219	1164.58	1164.57	-2.4232	2	0
									LENEIQTYR	0.00226	1164.58	1164.57	-2.4232	2	0
									YENEVALR	0.00236	992.493	992.49	-2.88969	2	0
									YENEVALR	0.00247	992.493	992.49	-3.07509	2	0
									YENEVALR	0.00257	992.493	992.49	-2.33654	2	0
									YENEVALR	0.0026	992.493	992.491	-1.90631	2	0
									YENEVALR	0.00264	992.493	992.491	-2.21362	2	0
									LKYENEVALR	0.00274	1233.67	1233.67	-2.79005	3	1
									VLDELTLTK	0.00274	1030.59	1030.59	-1.76598	2	0
									YENEVALR	0.00276	992.493	992.49	-2.27508	2	0
									SLLEGEGSSGGGGR	0.00302	1261.59	1261.59	-1.96736	2	0
									LKYENEVALR	0.00318	1233.67	1233.67	-3.16129	3	1
									YENEVALR	0.00325	992.493	992.49	-2.33654	2	0
									YENEVALR	0.00348	992.493	992.491	-1.90631	2	0
									LKYENEVALR	0.00392	1233.67	1233.67	-1.97378	3	1
									YENEVALR	0.0042	992.493	992.49	-2.58239	2	0
									SQYEQLAEQNRK	0.00427	1492.73	1492.73	-1.29428	3	1
									YENEVALR	0.00442	992.493	992.49	-2.398	2	0
									LKYENEVALR	0.0048	1233.67	1233.67	-2.71547	3	1
									LKYENEVALR	0.0055	1233.67	1233.67	-3.16129	3	1
									LKYENEVALR	0.0068	1233.67	1233.67	-2.79005	3	1
									SQYEQLAEQNRK	0.00695	1492.73	1492.72	-2.09147	3	1
									SLLEGEGSSGGGGR	0.00728	1261.59	1261.59	-2.06406	2	0
									LKYENEVALR	0.00749	1233.67	1233.67	-2.93838	3	1
									LKYENEVALR	0.00785	1233.67	1233.67	-1.97378	3	1
									SQYEQLAEQNRK	0.01	1492.73	1492.72	-2.09147	3	1
									YENEVALR	0.0185	992.493	992.49	-2.33654	2	0
									SQYEQLAEQNRK	0.029	1492.73	1492.72	-2.3983	3	1
									SQYEQLAEQNRK	0.0308	1492.73	1492.72	-2.2757	3	1
									SQYEQLAEQNRK	0.0321	1492.73	1492.72	-2.88867	3	1
	ABF10300.1	Rmet_3428	Cupriavidus metallidurans CH34	conserved hypothetical protein; predicted periplasmic or secreted lipoprotein	29257.7	9.37604	6	26.4085	DVVNELQVTASPGFMTR	8.7e-08	1878.91	1878.91	-2.2215	2	0	DVVNELQVTASPGFM[147]TR
									DVVNELQVTASPGFMTR	2.76e-07	1878.91	1878.91	-2.2215	2	0	DVVNELQVTASPGFM[147]TR
									DVVNELQVTASPGFMTR	3.05e-07	1878.91	1878.91	-1.63712	2	0	DVVNELQVTASPGFM[147]TR
									DVVNELQVTASPGFMTR	1.34e-06	1878.91	1878.91	-0.792479	2	0	DVVNELQVTASPGFM[147]TR
									DVVNELQVTASPGFMTR	2.13e-06	1878.91	1878.91	0.0521578	2	0	DVVNELQVTASPGFM[147]TR
									GLQMEIDSTLSSR	4e-06	1451.69	1451.69	-0.836265	2	0	GLQM[147]EIDSTLSSR
									DVVNELQVTASPGFMTR	4.98e-06	1878.91	1878.91	-1.57165	2	0	DVVNELQVTASPGFM[147]TR
									GLQMEIDSTLSSR	5.01e-06	1451.69	1451.69	-0.668186	2	0	GLQM[147]EIDSTLSSR
									GLQMEIDSTLSSR	5.9e-06	1451.69	1451.69	0.0881729	2	0	GLQM[147]EIDSTLSSR
									VLLVGEVSNADVK	8.08e-06	1341.75	1341.75	-0.485932	2	0
									DVVNELQVTASPGFMTR	9.42e-06	1878.91	1878.91	-1.50672	2	0	DVVNELQVTASPGFM[147]TR
									DVVNELQVTASPGFMTR	1.06e-05	1878.91	1878.91	-1.247	2	0	DVVNELQVTASPGFM[147]TR
									VLLVGEVSNADVK	1.48e-05	1341.75	1341.75	-1.39519	2	0
									TLMVTAEGVPANSIK	1.73e-05	1545.81	1545.8	-1.66191	2	0	TLM[147]VTAEGVPANSIK
									VLLVGEVSNADVK	2.16e-05	1341.75	1341.75	0.0603689	2	0
									TLMVTAEGVPANSIK	2.28e-05	1545.81	1545.81	-0.71419	2	0	TLM[147]VTAEGVPANSIK
									GLQMEIDSTLSSR	2.48e-05	1451.69	1451.69	-1.42523	2	0	GLQM[147]EIDSTLSSR
									VLLVGEVSNADVK	2.49e-05	1341.75	1341.75	-0.667784	2	0
									DVVNELQVTASPGFMTR	2.52e-05	1878.91	1878.91	-1.57165	2	0	DVVNELQVTASPGFM[147]TR
									DVVNELQVTASPGFMTR	2.67e-05	1878.91	1878.91	-0.85741	2	0	DVVNELQVTASPGFM[147]TR
									VLLVGEVSNADVK	2.79e-05	1341.75	1341.75	-0.940562	2	0
									GLQMEIDSTLSSR	3.66e-05	1451.69	1451.69	-1.42523	2	0	GLQM[147]EIDSTLSSR
									VLLVGEVSNADVK	4.3e-05	1341.75	1341.75	-1.39519	2	0
									TLMVTAEGVPANSIK	4.47e-05	1545.81	1545.81	-1.10945	2	0	TLM[147]VTAEGVPANSIK
									VLLVGEVSNADVK	4.71e-05	1341.75	1341.75	0.0603689	2	0
									GLQMEIDSTLSSR	4.76e-05	1451.69	1451.69	-0.752225	2	0	GLQM[147]EIDSTLSSR
									GLQMEIDSTLSSR	4.99e-05	1451.69	1451.69	-0.752225	2	0	GLQM[147]EIDSTLSSR
									TLMVTAEGVPANSIK	5.57e-05	1545.81	1545.8	-2.21502	2	0	TLM[147]VTAEGVPANSIK
									DVVNELQVTASPGFMTR	5.72e-05	1878.91	1878.91	-0.337429	2	0	DVVNELQVTASPGFM[147]TR
									GLQMEIDSTLSSR	5.85e-05	1451.69	1451.69	-0.920305	2	0	GLQM[147]EIDSTLSSR
									TLMVTAEGVPANSIK	5.92e-05	1545.81	1545.8	-1.74084	2	0	TLM[147]VTAEGVPANSIK
									VLLVGEVSNADVK	5.95e-05	1341.75	1341.75	-1.30427	2	0
									VLLVGEVSNADVK	6.31e-05	1341.75	1341.75	0.333147	2	0
									VLLVGEVSNADVK	7.89e-05	1341.75	1341.75	-0.667784	2	0
									GLQMEIDSTLSSR	8.2e-05	1451.69	1451.69	-0.752225	2	0	GLQM[147]EIDSTLSSR
									GLQMEIDSTLSSR	8.48e-05	1451.69	1451.69	-1.08907	2	0	GLQM[147]EIDSTLSSR
									GLQMEIDSTLSSR	9.16e-05	1451.69	1451.69	-0.752225	2	0	GLQM[147]EIDSTLSSR
									GLQMEIDSTLSSR	0.000104	1451.69	1451.69	-1.08907	2	0	GLQM[147]EIDSTLSSR
									DVVNELQVTASPGFMTR	0.000114	1878.91	1878.91	-2.0267	2	0	DVVNELQVTASPGFM[147]TR
									GLQMEIDSTLSSR	0.000126	1451.69	1451.69	-0.668186	2	0	GLQM[147]EIDSTLSSR
									GLQMEIDSTLSSR	0.000455	1451.69	1451.69	-1.50927	2	0	GLQM[147]EIDSTLSSR
									GLQMEIDSTLSSR	0.000469	1451.69	1451.69	1.60227	2	0	GLQM[147]EIDSTLSSR
									GLQMEIDSTLSSR	0.000889	1451.69	1451.69	-2.01351	2	0	GLQM[147]EIDSTLSSR
									GLQMEIDSTLSSR	0.00121	1451.69	1451.69	-0.668186	2	0	GLQM[147]EIDSTLSSR
									GLQMEIDSTLSSR	0.00132	1451.69	1451.69	-0.668186	2	0	GLQM[147]EIDSTLSSR
									GLQMEIDSTLSSR	0.00152	1451.69	1451.69	-2.35036	2	0	GLQM[147]EIDSTLSSR
									GLQMEIDSTLSSR	0.00167	1451.69	1451.69	-2.35036	2	0	GLQM[147]EIDSTLSSR
									SNDAYLTSK	0.00182	997.472	997.469	-2.25069	2	0
									GLQMEIDSTLSSR	0.00232	1451.69	1451.69	0.0881729	2	0	GLQM[147]EIDSTLSSR
									GLQMEIDSTLSSR	0.00274	1451.69	1451.69	-2.09755	2	0	GLQM[147]EIDSTLSSR
									GLQMEIDSTLSSR	0.00412	1451.69	1451.69	-0.920305	2	0	GLQM[147]EIDSTLSSR
									GLQMEIDSTLSSR	0.0043	1451.69	1451.69	-0.332026	2	0	GLQM[147]EIDSTLSSR
									SNDAYLTSK	0.00565	997.472	997.469	-2.80108	2	0
									GLQMEIDSTLSSR	0.00757	1451.69	1451.69	-0.500106	2	0	GLQM[147]EIDSTLSSR
									GLQMEIDSTLSSR	0.00998	1451.69	1451.69	-0.752225	2	0	GLQM[147]EIDSTLSSR
									GLQMEIDSTLSSR	0.0142	1451.69	1451.69	-1.42523	2	0	GLQM[147]EIDSTLSSR
									QQVEQYVR	0.044	1048.53	1048.53	-2.24409	2	0
									QQVEQYVR	0.0465	1048.53	1048.53	-0.8469	2	0
	P00761.1	-	Sus Scrofa	Trypsin	24409.2	6.99753	5	28.5714	LGEHNIDVLEGNEQFINAAK	4.11e-09	2210.1	2210.09	-2.42976	3	0
									SCAAAGTECLISGWGNTK	2.16e-07	1881.83	1881.83	-2.13993	2	0	SC[160]AAAGTEC[160]LISGWGNTK
									SCAAAGTECLISGWGNTK	2.99e-07	1881.83	1881.83	-1.29661	2	0	SC[160]AAAGTEC[160]LISGWGNTK
									SCAAAGTECLISGWGNTK	3.61e-07	1881.83	1881.83	-2.46408	2	0	SC[160]AAAGTEC[160]LISGWGNTK
									SCAAAGTECLISGWGNTK	6.92e-07	1881.83	1881.83	-0.582942	2	0	SC[160]AAAGTEC[160]LISGWGNTK
									LGEHNIDVLEGNEQFINAAK	1.03e-06	2210.1	2210.09	-1.84969	3	0
									LGEHNIDVLEGNEQFINAAK	1.48e-06	2210.1	2210.09	-1.43568	3	0
									LGEHNIDVLEGNEQFINAAK	1.72e-06	2210.1	2210.09	-1.43568	3	0
									LGEHNIDVLEGNEQFINAAK	2.63e-06	2210.1	2210.09	-1.68409	3	0
									LGEHNIDVLEGNEQFINAAK	2.99e-06	2210.1	2210.09	-2.92702	3	0
									LGEHNIDVLEGNEQFINAAK	6.24e-06	2210.1	2210.09	-1.68409	3	0
									APVLSDSSCK	6.24e-06	1062.5	1062.5	-2.64188	2	0	APVLSDSSC[160]K
									APVLSDSSCK	7.05e-06	1062.5	1062.5	-2.29741	2	0	APVLSDSSC[160]K
									APVLSDSSCK	7.81e-06	1062.5	1062.5	-2.06776	2	0	APVLSDSSC[160]K
									LGEHNIDVLEGNEQFINAAK	8.23e-06	2210.1	2210.09	-1.76689	3	0
									LGEHNIDVLEGNEQFINAAK	8.64e-06	2210.1	2210.09	-3.25823	3	0
									LGEHNIDVLEGNEQFINAAK	8.78e-06	2210.1	2210.09	-2.42976	3	0
									LGEHNIDVLEGNEQFINAAK	9.2e-06	2210.1	2210.09	-3.25823	3	0
									LGEHNIDVLEGNEQFINAAK	1.06e-05	2210.1	2210.09	-1.68409	3	0
									LGEHNIDVLEGNEQFINAAK	1.38e-05	2210.1	2210.09	-2.92702	3	0
									LGEHNIDVLEGNEQFINAAK	1.46e-05	2210.1	2210.09	-2.42976	3	0
									LGEHNIDVLEGNEQFINAAK	1.66e-05	2210.1	2210.09	-2.59536	3	0
									LGEHNIDVLEGNEQFINAAK	2.41e-05	2210.1	2210.09	-2.84422	3	0
									APVLSDSSCK	2.52e-05	1062.5	1062.5	-2.06776	2	0	APVLSDSSC[160]K
									LGEHNIDVLEGNEQFINAAK	2.68e-05	2210.1	2210.09	-2.26415	3	0
									LGEHNIDVLEGNEQFINAAK	3.17e-05	2210.1	2210.09	-2.92702	3	0
									LGEHNIDVLEGNEQFINAAK	3.18e-05	2210.1	2210.09	-2.42976	3	0
									APVLSDSSCK	3.5e-05	1062.5	1062.5	-2.87153	2	0	APVLSDSSC[160]K
									APVLSDSSCK	3.64e-05	1062.5	1062.5	-2.18259	2	0	APVLSDSSC[160]K
									APVLSDSSCK	3.83e-05	1062.5	1062.5	-2.18259	2	0	APVLSDSSC[160]K
									LGEHNIDVLEGNEQFINAAK	4.19e-05	2210.1	2210.09	-1.84969	3	0
									LGEHNIDVLEGNEQFINAAK	5.45e-05	2210.1	2210.09	-2.34696	3	0
									APVLSDSSCK	5.47e-05	1062.5	1062.5	-2.06776	2	0	APVLSDSSC[160]K
									LGEHNIDVLEGNEQFINAAK	5.62e-05	2210.1	2210.09	-2.26415	3	0
									LGEHNIDVLEGNEQFINAAK	6.15e-05	2210.1	2210.09	-1.84969	3	0
									LGEHNIDVLEGNEQFINAAK	6.86e-05	2210.1	2210.09	-4.1695	3	0
									LGEHNIDVLEGNEQFINAAK	7.26e-05	2210.1	2210.09	-2.26415	3	0
									LGEHNIDVLEGNEQFINAAK	7.48e-05	2210.1	2210.09	-2.34696	3	0
									LGEHNIDVLEGNEQFINAAK	8.13e-05	2211.1	2211.09	-4.65921	3	0
									LGEHNIDVLEGNEQFINAAK	9.87e-05	2210.1	2210.09	-1.84969	3	0
									LGEHNIDVLEGNEQFINAAK	0.000111	2211.1	2211.1	-3.25132	3	0
									LGEHNIDVLEGNEQFINAAK	0.000136	2210.1	2210.09	-2.01575	3	0
									LGEHNIDVLEGNEQFINAAK	0.000137	2210.1	2210.09	-2.51256	3	0
									LGEHNIDVLEGNEQFINAAK	0.000153	2210.1	2210.09	-2.59536	3	0
									APVLSDSSCK	0.000164	1062.5	1062.5	-2.41223	2	0	APVLSDSSC[160]K
									LGEHNIDVLEGNEQFINAAK	0.000184	2211.1	2211.09	-6.06665	3	0
									LGEHNIDVLEGNEQFINAAK	0.000226	2210.1	2210.09	-1.43568	3	0
									LGEHNIDVLEGNEQFINAAK	0.000245	2210.1	2210.09	-2.09855	3	0
									LGEHNIDVLEGNEQFINAAK	0.000284	2210.1	2210.09	-2.42976	3	0
									LGEHNIDVLEGNEQFINAAK	0.000353	2210.1	2210.09	-2.59536	3	0
									LGEHNIDVLEGNEQFINAAK	0.000918	2210.1	2210.09	-2.34696	3	0
									LGEHNIDVLEGNEQFINAAK	0.000919	2210.1	2210.09	-2.26415	3	0
									LGEHNIDVLEGNEQFINAAK	0.00101	2210.1	2210.09	-5.24683	3	0
									LGEHNIDVLEGNEQFINAAK	0.00104	2210.1	2210.1	-0.0271481	3	0
									LGEHNIDVLEGNEQFINAAK	0.00108	2210.1	2210.09	-1.68409	3	0
									LSSPATLNSR	0.00127	1044.56	1044.55	-2.4575	2	0
									LSSPATLNSR	0.00163	1044.56	1044.55	-3.15828	2	0
									LSSPATLNSR	0.00164	1044.56	1044.55	-3.50867	2	0
									LSSPATLNSR	0.00183	1044.56	1044.55	-3.15828	2	0
									LSSPATLNSR	0.00226	1044.56	1044.55	-2.80789	2	0
									LSSPATLNSR	0.00233	1044.56	1044.55	-3.97585	2	0
									LSSPATLNSR	0.00234	1044.56	1044.55	-2.10616	2	0
									LSSPATLNSR	0.00236	1044.56	1044.55	-3.50867	2	0
									LSSPATLNSR	0.00259	1044.56	1044.55	-2.10616	2	0
									LSSPATLNSR	0.0026	1044.56	1044.55	-3.50867	2	0
									LSSPATLNSR	0.00265	1044.56	1044.55	-3.15828	2	0
									LSSPATLNSR	0.00267	1044.56	1044.55	-3.15828	2	0
									LSSPATLNSR	0.0027	1044.56	1044.55	-2.10616	2	0
									LSSPATLNSR	0.00271	1044.56	1044.55	-4.0936	2	0
									LSSPATLNSR	0.00287	1044.56	1044.55	-2.80789	2	0
									LSSPATLNSR	0.0029	1044.56	1044.55	-2.92469	2	0
									LSSPATLNSR	0.00314	1044.56	1044.55	-3.27507	2	0
									LSSPATLNSR	0.00328	1044.56	1044.55	-2.5743	2	0
									LSSPATLNSR	0.00328	1044.56	1044.55	-2.92469	2	0
									LSSPATLNSR	0.00343	1044.56	1044.55	-2.5743	2	0
									LSSPATLNSR	0.00353	1044.56	1044.55	-2.22295	2	0
									LSSPATLNSR	0.00364	1044.56	1044.55	-2.5743	2	0
									LSSPATLNSR	0.00367	1044.56	1044.55	-2.5743	2	0
									LSSPATLNSR	0.00368	1044.56	1044.55	-3.97585	2	0
									LSSPATLNSR	0.0037	1044.56	1044.55	-3.39187	2	0
									LSSPATLNSR	0.0037	1044.56	1044.55	-3.50867	2	0
									LSSPATLNSR	0.00402	1044.56	1044.55	-3.15828	2	0
									LSSPATLNSR	0.00407	1044.56	1044.55	-4.0936	2	0
									LSSPATLNSR	0.00411	1044.56	1044.55	-3.15828	2	0
									LSSPATLNSR	0.00411	1044.56	1044.55	-2.33975	2	0
									LSSPATLNSR	0.00417	1044.56	1044.55	-2.5743	2	0
									LSSPATLNSR	0.00421	1044.56	1044.55	-3.50867	2	0
									LSSPATLNSR	0.00424	1044.56	1044.55	-3.15828	2	0
									LSSPATLNSR	0.00425	1044.56	1044.55	-3.74226	2	0
									LSSPATLNSR	0.00435	1044.56	1044.55	-2.22295	2	0
									LSSPATLNSR	0.00436	1044.56	1044.55	-2.22295	2	0
									LSSPATLNSR	0.00437	1044.56	1044.55	-3.15828	2	0
									LSSPATLNSR	0.00437	1044.56	1044.55	-2.92469	2	0
									LSSPATLNSR	0.00451	1044.56	1044.55	-2.80789	2	0
									LSSPATLNSR	0.00452	1044.56	1044.55	-3.39187	2	0
									LSSPATLNSR	0.00452	1044.56	1044.55	-3.97585	2	0
									LSSPATLNSR	0.00452	1044.56	1044.55	-2.10616	2	0
									LSSPATLNSR	0.00461	1044.56	1044.55	-2.69109	2	0
									LSSPATLNSR	0.00471	1044.56	1044.55	-2.5743	2	0
									LSSPATLNSR	0.00479	1044.56	1044.55	-3.74226	2	0
									LSSPATLNSR	0.00486	1044.56	1044.55	-4.0936	2	0
									LSSPATLNSR	0.00491	1044.56	1044.55	-3.27507	2	0
									LSSPATLNSR	0.00497	1044.56	1044.55	-3.39187	2	0
									LSSPATLNSR	0.00511	1044.56	1044.55	-2.33975	2	0
									LSSPATLNSR	0.00515	1044.56	1044.55	-3.15828	2	0
									LSSPATLNSR	0.0052	1044.56	1044.55	-3.15828	2	0
									LSSPATLNSR	0.00525	1044.56	1044.55	-2.69109	2	0
									LSSPATLNSR	0.00527	1044.56	1044.55	-2.69109	2	0
									LSSPATLNSR	0.00534	1044.56	1044.55	-2.4575	2	0
									LSSPATLNSR	0.00548	1044.56	1044.55	-2.22295	2	0
									LSSPATLNSR	0.00551	1044.56	1044.55	-2.22295	2	0
									LSSPATLNSR	0.00556	1044.56	1044.55	-4.0936	2	0
									LSSPATLNSR	0.0056	1044.56	1044.55	-2.10616	2	0
									LSSPATLNSR	0.00576	1044.56	1044.55	-2.69109	2	0
									LSSPATLNSR	0.00599	1044.56	1044.55	-3.97585	2	0
									LSSPATLNSR	0.00603	1044.56	1044.55	-2.5743	2	0
									LSSPATLNSR	0.00615	1044.56	1044.55	-3.74226	2	0
									VATVSLPR	0.00621	841.502	841.5	-2.58942	2	0
									LSSPATLNSR	0.00624	1044.56	1044.55	-3.50867	2	0
									LSSPATLNSR	0.00631	1044.56	1044.55	-3.15828	2	0
									LSSPATLNSR	0.00642	1044.56	1044.55	-3.15828	2	0
									LSSPATLNSR	0.00653	1044.56	1044.55	-3.50867	2	0
									LSSPATLNSR	0.00653	1045.56	1045.54	-23.4581	2	0
									LSSPATLNSR	0.00654	1044.56	1044.55	-3.85905	2	0
									LSSPATLNSR	0.0066	1044.56	1044.55	-2.69109	2	0
									LSSPATLNSR	0.00665	1044.56	1044.55	-3.15828	2	0
									LSSPATLNSR	0.00666	1044.56	1044.55	-3.27507	2	0
									LSSPATLNSR	0.00672	1044.56	1044.55	-3.85905	2	0
									LSSPATLNSR	0.00677	1044.56	1044.55	-2.10616	2	0
									LSSPATLNSR	0.0068	1044.56	1044.55	-4.0936	2	0
									LSSPATLNSR	0.00694	1044.56	1044.55	-2.69109	2	0
									LSSPATLNSR	0.00698	1044.56	1044.55	-2.10616	2	0
									VATVSLPR	0.00704	841.502	841.5	-2.15329	2	0
									LSSPATLNSR	0.00739	1044.56	1044.55	-2.22295	2	0
									LSSPATLNSR	0.00747	1044.56	1044.55	-2.5743	2	0
									LSSPATLNSR	0.00755	1044.56	1044.55	-2.69109	2	0
									LSSPATLNSR	0.00787	1044.56	1044.55	-3.15828	2	0
									LSSPATLNSR	0.00792	1044.56	1044.55	-3.39187	2	0
									LSSPATLNSR	0.00817	1044.56	1044.55	-2.22295	2	0
									VATVSLPR	0.0082	841.502	841.5	-2.15329	2	0
									VATVSLPR	0.00835	841.502	841.501	-1.86333	2	0
									LGEHNIDVLEGNEQFINAAK	0.00839	2211.1	2211.09	-4.99027	3	0
									LSSPATLNSR	0.00839	1044.56	1044.55	-2.10616	2	0
									VATVSLPR	0.0085	841.502	841.502	-0.486036	2	0
									VATVSLPR	0.00866	841.502	841.5	-2.58942	2	0
									LSSPATLNSR	0.00867	1044.56	1044.55	-2.4575	2	0
									LSSPATLNSR	0.00895	1044.56	1044.55	-2.92469	2	0
									VATVSLPR	0.00903	841.502	841.501	-1.50089	2	0
									VATVSLPR	0.00908	841.502	841.5	-2.44325	2	0
									LSSPATLNSR	0.00913	1044.56	1044.55	-2.5743	2	0
									VATVSLPR	0.00914	841.502	841.501	-1.64587	2	0
									VATVSLPR	0.00916	841.502	841.502	-0.558525	2	0
									LSSPATLNSR	0.00928	1044.56	1044.55	-3.27507	2	0
									VATVSLPR	0.00929	841.502	841.501	-1.13844	2	0
									LSSPATLNSR	0.00933	1044.56	1044.55	-3.15828	2	0
									VATVSLPR	0.0096	841.502	841.499	-4.03921	2	0
									VATVSLPR	0.00974	841.502	841.5	-2.44325	2	0
									LSSPATLNSR	0.00974	1044.56	1044.55	-2.22295	2	0
									VATVSLPR	0.00976	841.502	841.5	-2.80689	2	0
									VATVSLPR	0.00982	841.502	841.502	-0.631014	2	0
									LSSPATLNSR	0.00994	1044.56	1044.55	-2.33975	2	0
									VATVSLPR	0.01	841.502	841.501	-1.93582	2	0
									VATVSLPR	0.01	841.502	841.501	-1.4284	2	0
									LSSPATLNSR	0.0102	1044.56	1044.55	-2.10616	2	0
									VATVSLPR	0.0102	841.502	841.5	-2.66191	2	0
									VATVSLPR	0.0102	841.502	841.5	-2.7344	2	0
									VATVSLPR	0.0103	841.502	841.501	-1.86333	2	0
									LSSPATLNSR	0.0105	1044.56	1044.55	-3.15828	2	0
									VATVSLPR	0.0105	841.502	841.5	-2.7344	2	0
									VATVSLPR	0.0105	841.502	841.5	-2.15329	2	0
									VATVSLPR	0.0107	841.502	841.501	-0.848483	2	0
									VATVSLPR	0.0107	841.502	841.501	-1.4284	2	0
									VATVSLPR	0.0107	841.502	841.5	-3.02435	2	0
									LSSPATLNSR	0.0108	1045.56	1045.54	-24.1582	2	0
									LSSPATLNSR	0.0108	1044.56	1044.55	-3.85905	2	0
									VATVSLPR	0.0109	841.502	841.501	-1.71836	2	0
									LSSPATLNSR	0.0109	1044.56	1044.55	-2.4575	2	0
									VATVSLPR	0.0112	841.502	841.5	-2.66191	2	0
									LSSPATLNSR	0.0112	1044.56	1044.55	-2.69109	2	0
									VATVSLPR	0.0112	841.502	841.5	-3.09684	2	0
									VATVSLPR	0.0112	841.502	841.5	-2.15329	2	0
									VATVSLPR	0.0114	841.502	841.5	-3.09684	2	0
									LSSPATLNSR	0.0115	1044.56	1044.55	-2.5743	2	0
									VATVSLPR	0.0115	841.502	841.502	-0.631014	2	0
									VATVSLPR	0.0115	841.502	841.502	-0.631014	2	0
									VATVSLPR	0.0115	841.502	841.502	-0.631014	2	0
									VATVSLPR	0.0116	841.502	841.501	-0.920972	2	0
									VATVSLPR	0.0117	841.502	841.5	-2.15329	2	0
									VATVSLPR	0.0117	841.502	841.501	-1.28342	2	0
									VATVSLPR	0.0118	841.502	841.5	-2.37076	2	0
									LSSPATLNSR	0.0118	1044.56	1044.55	-2.4575	2	0
									VATVSLPR	0.0119	841.502	841.5	-2.29827	2	0
									VATVSLPR	0.0119	841.502	841.499	-3.24182	2	0
									VATVSLPR	0.0121	841.502	841.501	-1.86333	2	0
									VATVSLPR	0.0123	841.502	841.503	0.674983	2	0
									VATVSLPR	0.0123	841.502	841.501	-1.93582	2	0
									VATVSLPR	0.0123	841.502	841.502	-0.558525	2	0
									VATVSLPR	0.0123	841.502	841.5	-2.15329	2	0
									VATVSLPR	0.0124	841.502	841.501	-1.64587	2	0
									VATVSLPR	0.0124	841.502	841.501	-1.93582	2	0
									LSSPATLNSR	0.0125	1044.56	1044.55	-2.4575	2	0
									LSSPATLNSR	0.0126	1045.56	1045.54	-22.1737	2	0
									LSSPATLNSR	0.0126	1044.56	1044.55	-2.80789	2	0
									VATVSLPR	0.0126	841.502	841.502	-0.631014	2	0
									VATVSLPR	0.0127	841.502	841.502	-0.558525	2	0
									VATVSLPR	0.0127	841.502	841.499	-3.31431	2	0
									VATVSLPR	0.0129	841.502	841.5	-2.0808	2	0
									VATVSLPR	0.0129	841.502	841.501	-1.57338	2	0
									VATVSLPR	0.0129	841.502	841.501	-1.13844	2	0
									VATVSLPR	0.013	841.502	841.502	-0.631014	2	0
									VATVSLPR	0.0131	841.502	841.501	-1.79085	2	0
									VATVSLPR	0.0132	841.502	841.499	-3.31431	2	0
									VATVSLPR	0.0132	841.502	841.501	-1.50089	2	0
									VATVSLPR	0.0132	841.502	841.501	-1.57338	2	0
									LSSPATLNSR	0.0133	1045.56	1045.54	-23.5748	2	0
									VATVSLPR	0.0134	841.502	841.501	-1.79085	2	0
									VATVSLPR	0.0135	841.502	841.501	-1.4284	2	0
									VATVSLPR	0.0135	841.502	841.5	-2.58942	2	0
									LSSPATLNSR	0.0135	1044.56	1044.55	-3.97585	2	0
									LSSPATLNSR	0.0135	1044.56	1044.55	-2.5743	2	0
									VATVSLPR	0.0136	841.502	841.501	-1.06595	2	0
									VATVSLPR	0.0137	841.502	841.501	-1.71836	2	0
									VATVSLPR	0.0137	841.502	841.501	-1.86333	2	0
									VATVSLPR	0.0138	841.502	841.5	-2.0808	2	0
									VATVSLPR	0.0138	841.502	841.499	-3.82174	2	0
									VATVSLPR	0.0138	841.502	841.499	-3.89423	2	0
									VATVSLPR	0.0138	841.502	841.5	-2.00831	2	0
									VATVSLPR	0.0141	841.502	841.5	-2.22578	2	0
									VATVSLPR	0.0141	841.502	841.501	-1.50089	2	0
									VATVSLPR	0.0141	841.502	841.499	-3.82174	2	0
									VATVSLPR	0.0141	841.502	841.499	-3.67676	2	0
									VATVSLPR	0.0142	841.502	841.502	-0.631014	2	0
									VATVSLPR	0.0142	841.502	841.501	-0.848483	2	0
									VATVSLPR	0.0142	841.502	841.5	-2.37076	2	0
									VATVSLPR	0.0144	841.502	841.501	-0.920972	2	0
									VATVSLPR	0.0144	841.502	841.5	-2.80689	2	0
									VATVSLPR	0.0145	841.502	841.503	1.54486	2	0
									VATVSLPR	0.0146	841.502	841.501	-1.86333	2	0
									VATVSLPR	0.0146	841.502	841.501	-1.50089	2	0
									VATVSLPR	0.0146	841.502	841.499	-3.74925	2	0
									VATVSLPR	0.0147	841.502	841.5	-2.0808	2	0
									VATVSLPR	0.0148	841.502	841.5	-2.15329	2	0
									VATVSLPR	0.015	841.502	841.501	-1.79085	2	0
									VATVSLPR	0.015	841.502	841.5	-2.80689	2	0
									VATVSLPR	0.015	841.502	841.5	-2.66191	2	0
									VATVSLPR	0.0151	841.502	841.502	-0.631014	2	0
									VATVSLPR	0.0151	841.502	841.5	-2.37076	2	0
									VATVSLPR	0.0151	841.502	841.501	-1.79085	2	0
									VATVSLPR	0.0151	841.502	841.501	-1.21093	2	0
									VATVSLPR	0.0151	841.502	841.5	-2.44325	2	0
									VATVSLPR	0.0152	841.502	841.5	-2.00831	2	0
									VATVSLPR	0.0153	841.502	841.502	-0.631014	2	0
									VATVSLPR	0.0153	841.502	841.5	-2.44325	2	0
									VATVSLPR	0.0154	841.502	841.5	-2.51693	2	0
									VATVSLPR	0.0154	841.502	841.497	-5.56267	2	0
									VATVSLPR	0.0155	841.502	841.5	-2.66191	2	0
									VATVSLPR	0.0155	841.502	841.5	-2.22578	2	0
									VATVSLPR	0.0155	841.502	841.499	-3.67676	2	0
									VATVSLPR	0.0156	841.502	841.5	-2.00831	2	0
									VATVSLPR	0.0156	841.502	841.501	-1.79085	2	0
									VATVSLPR	0.0157	841.502	841.5	-2.15329	2	0
									VATVSLPR	0.0157	841.502	841.5	-3.09684	2	0
									VATVSLPR	0.0157	841.502	841.499	-3.82174	2	0
									VATVSLPR	0.0157	841.502	841.501	-1.50089	2	0
									VATVSLPR	0.0158	841.502	841.5	-2.80689	2	0
									VATVSLPR	0.0158	841.502	841.501	-1.79085	2	0
									VATVSLPR	0.0158	841.502	841.5	-2.44325	2	0
									VATVSLPR	0.0159	841.502	841.499	-3.89423	2	0
									VATVSLPR	0.016	841.502	841.5	-2.37076	2	0
									VATVSLPR	0.0161	841.502	841.5	-2.58942	2	0
									VATVSLPR	0.0161	841.502	841.499	-3.45929	2	0
									VATVSLPR	0.0162	841.502	841.501	-0.775993	2	0
									VATVSLPR	0.0162	841.502	841.5	-2.66191	2	0
									VATVSLPR	0.0163	841.502	841.502	0.312536	2	0
									VATVSLPR	0.0163	841.502	841.501	-1.71836	2	0
									VATVSLPR	0.0163	841.502	841.5	-2.00831	2	0
									LGEHNIDVLEGNEQFINAAK	0.0163	2210.1	2210.09	-3.09262	3	0
									LSSPATLNSR	0.0164	1044.56	1044.55	-2.33975	2	0
									VATVSLPR	0.0165	841.502	841.502	-0.703504	2	0
									VATVSLPR	0.0166	841.502	841.499	-3.45929	2	0
									VATVSLPR	0.0166	841.502	841.5	-2.44325	2	0
									VATVSLPR	0.0167	841.502	841.5	-2.66191	2	0
									VATVSLPR	0.0168	841.502	841.5	-2.37076	2	0
									VATVSLPR	0.0169	841.502	841.501	-1.71836	2	0
									VATVSLPR	0.0169	841.502	841.499	-3.3868	2	0
									LSSPATLNSR	0.0169	1044.56	1044.55	-4.0936	2	0
									VATVSLPR	0.017	841.502	841.499	-3.89423	2	0
									VATVSLPR	0.017	841.502	841.501	-1.79085	2	0
									VATVSLPR	0.017	841.502	841.5	-2.87937	2	0
									VATVSLPR	0.017	841.502	841.5	-2.66191	2	0
									LSSPATLNSR	0.017	1045.56	1045.54	-24.1582	2	0
									VATVSLPR	0.0171	841.502	841.499	-3.3868	2	0
									VATVSLPR	0.0172	841.502	841.501	-1.86333	2	0
									VATVSLPR	0.0173	841.502	841.501	-1.35591	2	0
									VATVSLPR	0.0174	841.502	841.5	-2.0808	2	0
									VATVSLPR	0.0174	841.502	841.503	0.964941	2	0
									VATVSLPR	0.0174	841.502	841.5	-2.7344	2	0
									VATVSLPR	0.0175	841.502	841.502	-0.1224	2	0
									VATVSLPR	0.0175	841.502	841.502	-0.413546	2	0
									VATVSLPR	0.0177	841.502	841.502	-0.631014	2	0
									VATVSLPR	0.0178	841.502	841.501	-1.57338	2	0
									VATVSLPR	0.0178	841.502	841.5	-2.0808	2	0
									VATVSLPR	0.0178	841.502	841.501	-1.86333	2	0
									VATVSLPR	0.0179	841.502	841.5	-2.29827	2	0
									LSSPATLNSR	0.0181	1044.56	1044.55	-2.4575	2	0
									VATVSLPR	0.0182	841.502	841.501	-1.71836	2	0
									VATVSLPR	0.0182	841.502	841.5	-2.51693	2	0
									VATVSLPR	0.0183	841.502	841.501	-1.71836	2	0
									VATVSLPR	0.0183	841.502	841.5	-2.37076	2	0
									VATVSLPR	0.0183	841.502	841.5	-2.29827	2	0
									VATVSLPR	0.0184	841.502	841.501	-1.13844	2	0
									VATVSLPR	0.0184	841.502	841.501	-1.28342	2	0
									VATVSLPR	0.0184	841.502	841.499	-3.24182	2	0
									VATVSLPR	0.0186	841.502	841.5	-2.95186	2	0
									VATVSLPR	0.0187	841.502	841.502	0.0225787	2	0
									VATVSLPR	0.0187	841.502	841.5	-2.7344	2	0
									VATVSLPR	0.0189	841.502	841.501	-0.775993	2	0
									VATVSLPR	0.0192	841.502	841.5	-2.7344	2	0
									VATVSLPR	0.0192	841.502	841.5	-2.7344	2	0
									VATVSLPR	0.0193	841.502	841.5	-3.09684	2	0
									VATVSLPR	0.0193	841.502	841.501	-1.13844	2	0
									VATVSLPR	0.0193	841.502	841.499	-3.16933	2	0
									VATVSLPR	0.0197	841.502	841.5	-2.80689	2	0
									LSSPATLNSR	0.0197	1044.56	1044.55	-3.15828	2	0
									VATVSLPR	0.0198	841.502	841.5	-2.0808	2	0
									VATVSLPR	0.0198	841.502	841.5	-2.44325	2	0
									VATVSLPR	0.0199	841.502	841.5	-2.87937	2	0
									VATVSLPR	0.02	841.502	841.5	-2.44325	2	0
									VATVSLPR	0.02	841.502	841.499	-3.67676	2	0
									VATVSLPR	0.02	841.502	841.501	-1.21093	2	0
									VATVSLPR	0.02	841.502	841.5	-2.58942	2	0
									VATVSLPR	0.0201	841.502	841.501	-1.50089	2	0
									VATVSLPR	0.0202	841.502	841.5	-2.29827	2	0
									VATVSLPR	0.0202	841.502	841.501	-1.57338	2	0
									VATVSLPR	0.0202	841.502	841.5	-2.22578	2	0
									VATVSLPR	0.0203	841.502	841.499	-4.11169	2	0
									VATVSLPR	0.0203	841.502	841.5	-2.15329	2	0
									VATVSLPR	0.0203	841.502	841.5	-3.02435	2	0
									VATVSLPR	0.0203	841.502	841.499	-3.67676	2	0
									VATVSLPR	0.0204	841.502	841.501	-1.28342	2	0
									VATVSLPR	0.0204	841.502	841.501	-0.775993	2	0
									VATVSLPR	0.0205	841.502	841.5	-2.37076	2	0
									VATVSLPR	0.0206	841.502	841.501	-1.57338	2	0
									VATVSLPR	0.0206	841.502	841.5	-2.51693	2	0
									VATVSLPR	0.0206	841.502	841.5	-2.15329	2	0
									VATVSLPR	0.0207	841.502	841.501	-1.86333	2	0
									VATVSLPR	0.0207	841.502	841.5	-2.58942	2	0
									VATVSLPR	0.0208	841.502	841.499	-3.24182	2	0
									VATVSLPR	0.021	841.502	841.501	-1.13844	2	0
									VATVSLPR	0.0211	841.502	841.501	-1.93582	2	0
									VATVSLPR	0.0211	841.502	841.5	-2.00831	2	0
									VATVSLPR	0.0211	841.502	841.5	-2.37076	2	0
									VATVSLPR	0.0213	841.502	841.501	-1.28342	2	0
									VATVSLPR	0.0213	841.502	841.499	-4.03921	2	0
									VATVSLPR	0.0213	841.502	841.501	-1.06595	2	0
									VATVSLPR	0.0213	841.502	841.499	-3.3868	2	0
									VATVSLPR	0.0213	841.502	841.499	-3.24182	2	0
									VATVSLPR	0.0214	841.502	841.502	-0.631014	2	0
									VATVSLPR	0.0214	841.502	841.5	-2.44325	2	0
									VATVSLPR	0.0214	841.502	841.5	-2.87937	2	0
									LSSPATLNSR	0.0215	1045.56	1045.54	-20.5392	2	0
									VATVSLPR	0.0216	841.502	841.5	-2.0808	2	0
									VATVSLPR	0.0216	841.502	841.5	-3.09684	2	0
									VATVSLPR	0.0217	841.502	841.499	-3.89423	2	0
									VATVSLPR	0.0217	841.502	841.5	-2.22578	2	0
									LSSPATLNSR	0.0219	1044.56	1044.55	-3.15828	2	0
									VATVSLPR	0.0219	841.502	841.5	-2.87937	2	0
									VATVSLPR	0.0219	841.502	841.499	-3.74925	2	0
									VATVSLPR	0.0219	841.502	841.5	-2.22578	2	0
									VATVSLPR	0.0219	841.502	841.5	-2.51693	2	0
									VATVSLPR	0.0219	841.502	841.5	-2.66191	2	0
									VATVSLPR	0.0219	841.502	841.501	-1.21093	2	0
									VATVSLPR	0.022	841.502	841.5	-2.00831	2	0
									VATVSLPR	0.022	841.502	841.499	-3.45929	2	0
									VATVSLPR	0.022	841.502	841.5	-2.58942	2	0
									VATVSLPR	0.022	841.502	841.499	-3.16933	2	0
									VATVSLPR	0.022	841.502	841.5	-2.51693	2	0
									VATVSLPR	0.0221	841.502	841.5	-2.80689	2	0
									VATVSLPR	0.0221	841.502	841.499	-3.16933	2	0
									VATVSLPR	0.0222	841.502	841.5	-2.44325	2	0
									VATVSLPR	0.0223	841.502	841.503	0.747473	2	0
									VATVSLPR	0.0223	841.502	841.501	-1.06595	2	0
									VATVSLPR	0.0223	841.502	841.501	-1.50089	2	0
									VATVSLPR	0.0223	841.502	841.5	-2.29827	2	0
									VATVSLPR	0.0223	841.502	841.498	-5.05525	2	0
									VATVSLPR	0.0223	841.502	841.5	-2.00831	2	0
									VATVSLPR	0.0224	841.502	841.502	0.0225787	2	0
									VATVSLPR	0.0224	841.502	841.5	-2.87937	2	0
									VATVSLPR	0.0225	841.502	841.501	-0.775993	2	0
									VATVSLPR	0.0226	841.502	841.501	-0.920972	2	0
									VATVSLPR	0.0226	841.502	841.501	-1.93582	2	0
									VATVSLPR	0.0226	841.502	841.501	-1.4284	2	0
									VATVSLPR	0.0227	841.502	841.5	-2.0808	2	0
									VATVSLPR	0.0227	841.502	841.5	-2.87937	2	0
									VATVSLPR	0.0228	841.502	841.5	-3.09684	2	0
									VATVSLPR	0.0229	841.502	841.5	-2.37076	2	0
									VATVSLPR	0.0229	841.502	841.501	-0.993462	2	0
									VATVSLPR	0.0233	841.502	841.501	-1.57338	2	0
									VATVSLPR	0.0233	841.502	841.501	-1.93582	2	0
									VATVSLPR	0.0233	841.502	841.501	-1.93582	2	0
									VATVSLPR	0.0234	841.502	841.5	-2.58942	2	0
									VATVSLPR	0.0235	841.502	841.499	-3.3868	2	0
									VATVSLPR	0.0235	841.502	841.499	-3.24182	2	0
									VATVSLPR	0.0237	841.502	841.499	-4.03921	2	0
									VATVSLPR	0.0238	841.502	841.502	-0.267379	2	0
									VATVSLPR	0.0239	841.502	841.499	-3.67676	2	0
									VATVSLPR	0.0239	841.502	841.502	-0.631014	2	0
									VATVSLPR	0.0239	841.502	841.501	-1.13844	2	0
									VATVSLPR	0.0239	841.502	841.499	-4.03921	2	0
									VATVSLPR	0.0241	841.502	841.5	-2.87937	2	0
									VATVSLPR	0.0241	841.502	841.5	-2.22578	2	0
									VATVSLPR	0.0241	841.502	841.5	-3.02435	2	0
									VATVSLPR	0.0241	841.502	841.5	-2.15329	2	0
									VATVSLPR	0.0242	841.502	841.501	-1.35591	2	0
									VATVSLPR	0.0242	841.502	841.502	-0.19489	2	0
									VATVSLPR	0.0242	841.502	841.503	0.747473	2	0
									VATVSLPR	0.0242	841.502	841.5	-2.87937	2	0
									VATVSLPR	0.0243	841.502	841.5	-2.0808	2	0
									VATVSLPR	0.0243	841.502	841.501	-1.50089	2	0
									VATVSLPR	0.0243	841.502	841.502	0.0950681	2	0
									VATVSLPR	0.0243	841.502	841.501	-1.21093	2	0
									VATVSLPR	0.0243	841.502	841.501	-1.57338	2	0
									VATVSLPR	0.0243	841.502	841.5	-2.00831	2	0
									VATVSLPR	0.0244	841.502	841.5	-2.66191	2	0
									VATVSLPR	0.0245	841.502	841.499	-4.03921	2	0
									VATVSLPR	0.0246	841.502	841.5	-2.66191	2	0
									VATVSLPR	0.0247	841.502	841.5	-2.0808	2	0
									VATVSLPR	0.0247	841.502	841.501	-1.64587	2	0
									LSSPATLNSR	0.0247	1044.56	1044.55	-2.10616	2	0
									VATVSLPR	0.0249	841.502	841.5	-2.44325	2	0
									VATVSLPR	0.025	841.502	841.5	-2.51693	2	0
									VATVSLPR	0.025	841.502	841.502	-0.631014	2	0
									VATVSLPR	0.025	841.502	841.5	-2.15329	2	0
									VATVSLPR	0.0251	841.502	841.501	-1.64587	2	0
									VATVSLPR	0.0251	841.502	841.501	-0.775993	2	0
									VATVSLPR	0.0251	841.502	841.501	-1.93582	2	0
									VATVSLPR	0.0252	841.502	841.501	-1.93582	2	0
									VATVSLPR	0.0254	841.502	841.501	-1.71836	2	0
									VATVSLPR	0.0255	841.502	841.5	-2.58942	2	0
									VATVSLPR	0.0255	841.502	841.502	-0.486036	2	0
									VATVSLPR	0.0255	841.502	841.501	-1.57338	2	0
									VATVSLPR	0.0255	841.502	841.501	-1.79085	2	0
									VATVSLPR	0.0256	841.502	841.5	-3.02435	2	0
									VATVSLPR	0.0257	841.502	841.502	-0.486036	2	0
									VATVSLPR	0.0257	841.502	841.5	-2.7344	2	0
									VATVSLPR	0.0258	841.502	841.502	-0.558525	2	0
									VATVSLPR	0.0258	841.502	841.5	-2.44325	2	0
									VATVSLPR	0.0259	841.502	841.5	-2.00831	2	0
									VATVSLPR	0.026	841.502	841.501	-1.86333	2	0
									VATVSLPR	0.026	841.502	841.5	-2.37076	2	0
									VATVSLPR	0.0261	841.502	841.5	-2.15329	2	0
									VATVSLPR	0.0263	841.502	841.501	-0.775993	2	0
									VATVSLPR	0.0263	841.502	841.5	-2.87937	2	0
									VATVSLPR	0.0263	841.502	841.499	-4.03921	2	0
									VATVSLPR	0.0264	841.502	841.501	-1.35591	2	0
									VATVSLPR	0.0264	841.502	841.5	-2.44325	2	0
									VATVSLPR	0.0265	841.502	841.5	-2.80689	2	0
									VATVSLPR	0.0266	841.502	841.5	-2.22578	2	0
									VATVSLPR	0.0266	841.502	841.5	-2.58942	2	0
									VATVSLPR	0.0266	841.502	841.5	-2.58942	2	0
									VATVSLPR	0.0266	841.502	841.5	-2.66191	2	0
									VATVSLPR	0.0267	841.502	841.502	-0.0499107	2	0
									VATVSLPR	0.0268	841.502	841.5	-2.51693	2	0
									VATVSLPR	0.0268	841.502	841.5	-2.44325	2	0
									VATVSLPR	0.0268	841.502	841.499	-3.82174	2	0
									VATVSLPR	0.0269	841.502	841.501	-1.28342	2	0
									VATVSLPR	0.027	841.502	841.501	-1.64587	2	0
									VATVSLPR	0.027	841.502	841.499	-4.03921	2	0
									VATVSLPR	0.0271	841.502	841.5	-3.09684	2	0
									VATVSLPR	0.0272	841.502	841.501	-1.57338	2	0
									VATVSLPR	0.0274	841.502	841.501	-0.848483	2	0
									VATVSLPR	0.0274	841.502	841.501	-1.35591	2	0
									VATVSLPR	0.0274	841.502	841.5	-2.51693	2	0
									VATVSLPR	0.0275	841.502	841.501	-0.848483	2	0
									VATVSLPR	0.0275	841.502	841.5	-2.51693	2	0
									VATVSLPR	0.0275	841.502	841.5	-2.80689	2	0
									VATVSLPR	0.0275	841.502	841.5	-2.44325	2	0
									VATVSLPR	0.0275	841.502	841.5	-2.66191	2	0
									VATVSLPR	0.0275	841.502	841.5	-2.80689	2	0
									VATVSLPR	0.0276	841.502	841.502	-0.267379	2	0
									VATVSLPR	0.0276	841.502	841.5	-2.58942	2	0
									VATVSLPR	0.0277	841.502	841.5	-3.09684	2	0
									VATVSLPR	0.0277	841.502	841.499	-3.60427	2	0
									VATVSLPR	0.0278	841.502	841.501	-1.86333	2	0
									VATVSLPR	0.0278	841.502	841.5	-2.58942	2	0
									VATVSLPR	0.0279	841.502	841.5	-3.02435	2	0
									VATVSLPR	0.0279	841.502	841.5	-2.7344	2	0
									VATVSLPR	0.028	841.502	841.5	-2.7344	2	0
									VATVSLPR	0.028	841.502	841.499	-3.82174	2	0
									VATVSLPR	0.028	841.502	841.5	-2.0808	2	0
									VATVSLPR	0.0281	841.502	841.501	-1.93582	2	0
									VATVSLPR	0.0281	841.502	841.498	-5.41769	2	0
									VATVSLPR	0.0281	841.502	841.5	-2.37076	2	0
									VATVSLPR	0.0282	841.502	841.5	-2.66191	2	0
									VATVSLPR	0.0283	841.502	841.502	-0.1224	2	0
									VATVSLPR	0.0283	841.502	841.5	-2.00831	2	0
									VATVSLPR	0.0283	841.502	841.5	-2.95186	2	0
									VATVSLPR	0.0285	841.502	841.5	-2.51693	2	0
									VATVSLPR	0.0285	841.502	841.499	-3.82174	2	0
									VATVSLPR	0.0285	841.502	841.5	-2.51693	2	0
									VATVSLPR	0.0285	841.502	841.5	-2.29827	2	0
									VATVSLPR	0.0286	841.502	841.501	-1.71836	2	0
									VATVSLPR	0.0287	841.502	841.5	-2.58942	2	0
									VATVSLPR	0.0288	841.502	841.5	-2.58942	2	0
									VATVSLPR	0.0288	841.502	841.501	-1.13844	2	0
									VATVSLPR	0.0289	841.502	841.502	-0.703504	2	0
									VATVSLPR	0.0289	841.502	841.5	-2.22578	2	0
									VATVSLPR	0.0289	841.502	841.5	-2.29827	2	0
									VATVSLPR	0.0291	841.502	841.502	-0.558525	2	0
									VATVSLPR	0.0291	841.502	841.499	-3.16933	2	0
									VATVSLPR	0.0291	841.502	841.5	-2.95186	2	0
									VATVSLPR	0.0292	841.502	841.501	-1.50089	2	0
									VATVSLPR	0.0292	841.502	841.501	-1.79085	2	0
									VATVSLPR	0.0293	841.502	841.5	-2.22578	2	0
									VATVSLPR	0.0293	841.502	841.5	-2.51693	2	0
									VATVSLPR	0.0293	841.502	841.5	-2.51693	2	0
									VATVSLPR	0.0294	841.502	841.501	-1.86333	2	0
									VATVSLPR	0.0294	841.502	841.5	-2.95186	2	0
									VATVSLPR	0.0294	841.502	841.5	-2.15329	2	0
									VATVSLPR	0.0295	841.502	841.499	-4.18418	2	0
									VATVSLPR	0.0295	841.502	841.5	-2.29827	2	0
									VATVSLPR	0.0297	841.502	841.499	-3.67676	2	0
									VATVSLPR	0.0297	841.502	841.5	-2.7344	2	0
									VATVSLPR	0.0297	841.502	841.502	0.312536	2	0
									VATVSLPR	0.0299	841.502	841.501	-1.79085	2	0
									VATVSLPR	0.03	841.502	841.5	-2.51693	2	0
									LSSPATLNSR	0.03	1044.56	1044.55	-3.15828	2	0
									VATVSLPR	0.03	841.502	841.502	-0.19489	2	0
									VATVSLPR	0.0302	841.502	841.499	-3.45929	2	0
									VATVSLPR	0.0303	841.502	841.499	-4.03921	2	0
									VATVSLPR	0.0303	841.502	841.5	-2.44325	2	0
									VATVSLPR	0.0304	841.502	841.5	-2.80689	2	0
									VATVSLPR	0.0305	841.502	841.5	-2.00831	2	0
									VATVSLPR	0.0305	841.502	841.501	-1.4284	2	0
									VATVSLPR	0.0308	841.502	841.5	-2.0808	2	0
									VATVSLPR	0.0308	841.502	841.501	-1.64587	2	0
									VATVSLPR	0.031	841.502	841.501	-1.13844	2	0
									VATVSLPR	0.031	841.502	841.5	-2.0808	2	0
									VATVSLPR	0.031	841.502	841.5	-2.7344	2	0
									VATVSLPR	0.0311	841.502	841.5	-2.15329	2	0
									VATVSLPR	0.0312	841.502	841.502	-0.0499107	2	0
									VATVSLPR	0.0314	841.502	841.499	-3.24182	2	0
									VATVSLPR	0.0315	841.502	841.501	-1.13844	2	0
									VATVSLPR	0.0316	841.502	841.5	-2.95186	2	0
									VATVSLPR	0.0317	841.502	841.5	-2.0808	2	0
									VATVSLPR	0.0318	841.502	841.501	-1.50089	2	0
									VATVSLPR	0.0319	841.502	841.5	-2.0808	2	0
									VATVSLPR	0.0319	841.502	841.5	-2.51693	2	0
									VATVSLPR	0.0319	841.502	841.5	-2.00831	2	0
									VATVSLPR	0.032	841.502	841.5	-2.22578	2	0
									VATVSLPR	0.0321	841.502	841.5	-3.09684	2	0
									VATVSLPR	0.0324	841.502	841.5	-2.87937	2	0
									VATVSLPR	0.0325	841.502	841.5	-2.51693	2	0
									VATVSLPR	0.0326	841.502	841.5	-2.58942	2	0
									VATVSLPR	0.0326	841.502	841.5	-2.58942	2	0
									VATVSLPR	0.0326	841.502	841.499	-3.53178	2	0
									VATVSLPR	0.0328	841.502	841.5	-2.0808	2	0
									VATVSLPR	0.0329	841.502	841.499	-3.60427	2	0
									VATVSLPR	0.0329	841.502	841.5	-2.7344	2	0
									VATVSLPR	0.033	841.502	841.499	-3.67676	2	0
									VATVSLPR	0.033	841.502	841.5	-2.37076	2	0
									VATVSLPR	0.033	841.502	841.5	-3.09684	2	0
									VATVSLPR	0.033	841.502	841.5	-2.80689	2	0
									LSSPATLNSR	0.0332	1045.56	1045.54	-23.6915	2	0
									VATVSLPR	0.0332	841.502	841.501	-0.848483	2	0
									VATVSLPR	0.0332	841.502	841.5	-2.29827	2	0
									VATVSLPR	0.0333	841.502	841.501	-1.86333	2	0
									VATVSLPR	0.0335	841.502	841.5	-3.09684	2	0
									VATVSLPR	0.0335	841.502	841.501	-1.57338	2	0
									VATVSLPR	0.0336	841.502	841.498	-4.47414	2	0
									VATVSLPR	0.0336	841.502	841.5	-2.87937	2	0
									VATVSLPR	0.0338	841.502	841.499	-3.45929	2	0
									VATVSLPR	0.0339	841.502	841.501	-1.64587	2	0
									VATVSLPR	0.0339	841.502	841.5	-2.37076	2	0
									VATVSLPR	0.0342	841.502	841.499	-4.25667	2	0
									VATVSLPR	0.0342	841.502	841.5	-2.80689	2	0
									VATVSLPR	0.0343	841.502	841.5	-2.0808	2	0
									VATVSLPR	0.0343	841.502	841.501	-1.06595	2	0
									VATVSLPR	0.0344	841.502	841.501	-1.4284	2	0
									VATVSLPR	0.0345	841.502	841.5	-2.58942	2	0
									VATVSLPR	0.0345	841.502	841.5	-2.0808	2	0
									VATVSLPR	0.0345	841.502	841.5	-2.95186	2	0
									VATVSLPR	0.0346	841.502	841.501	-1.79085	2	0
									VATVSLPR	0.0346	841.502	841.501	-1.86333	2	0
									VATVSLPR	0.0348	841.502	841.499	-4.03921	2	0
									VATVSLPR	0.0348	841.502	841.5	-2.22578	2	0
									VATVSLPR	0.0349	841.502	841.5	-2.15329	2	0
									VATVSLPR	0.0349	841.502	841.5	-2.15329	2	0
									VATVSLPR	0.035	841.502	841.501	-0.993462	2	0
									VATVSLPR	0.035	841.502	841.5	-2.58942	2	0
									VATVSLPR	0.0351	841.502	841.5	-2.44325	2	0
									VATVSLPR	0.0351	841.502	841.5	-2.15329	2	0
									VATVSLPR	0.0352	841.502	841.5	-2.66191	2	0
									VATVSLPR	0.0352	841.502	841.5	-3.09684	2	0
									VATVSLPR	0.0354	841.502	841.5	-2.80689	2	0
									VATVSLPR	0.0354	841.502	841.5	-2.00831	2	0
									VATVSLPR	0.0355	841.502	841.5	-2.15329	2	0
									VATVSLPR	0.0357	841.502	841.499	-3.53178	2	0
									VATVSLPR	0.0359	841.502	841.499	-3.67676	2	0
									VATVSLPR	0.0359	841.502	841.499	-4.03921	2	0
									VATVSLPR	0.0359	841.502	841.5	-2.7344	2	0
									VATVSLPR	0.036	841.502	841.499	-3.16933	2	0
									VATVSLPR	0.0361	841.502	841.5	-2.58942	2	0
									VATVSLPR	0.0361	841.502	841.502	0.385026	2	0
									VATVSLPR	0.0362	841.502	841.5	-2.80689	2	0
									VATVSLPR	0.0362	841.502	841.5	-2.80689	2	0
									VATVSLPR	0.0363	841.502	841.5	-2.58942	2	0
									VATVSLPR	0.0363	841.502	841.499	-3.24182	2	0
									VATVSLPR	0.0364	841.502	841.499	-4.18418	2	0
									VATVSLPR	0.0366	841.502	841.501	-1.50089	2	0
									VATVSLPR	0.0368	841.502	841.501	-1.57338	2	0
									VATVSLPR	0.0368	841.502	841.5	-2.29827	2	0
									VATVSLPR	0.0369	841.502	841.5	-2.95186	2	0
									VATVSLPR	0.0369	841.502	841.5	-2.37076	2	0
									VATVSLPR	0.0374	841.502	841.502	-0.1224	2	0
									VATVSLPR	0.0374	841.502	841.501	-1.93582	2	0
									VATVSLPR	0.0376	841.502	841.5	-2.44325	2	0
									VATVSLPR	0.038	841.502	841.499	-4.11169	2	0
									VATVSLPR	0.038	841.502	841.5	-2.29827	2	0
									VATVSLPR	0.0381	841.502	841.5	-2.44325	2	0
									VATVSLPR	0.0383	841.502	841.5	-2.51693	2	0
									VATVSLPR	0.0386	841.502	841.499	-3.74925	2	0
									VATVSLPR	0.0387	841.502	841.501	-1.79085	2	0
									VATVSLPR	0.0387	841.502	841.501	-1.50089	2	0
									VATVSLPR	0.0389	841.502	841.501	-1.35591	2	0
									VATVSLPR	0.0389	841.502	841.501	-1.86333	2	0
									VATVSLPR	0.039	841.502	841.498	-5.41769	2	0
									VATVSLPR	0.039	841.502	841.5	-2.7344	2	0
									VATVSLPR	0.039	841.502	841.502	-0.486036	2	0
									VATVSLPR	0.0391	841.502	841.501	-1.06595	2	0
									VATVSLPR	0.0392	841.502	841.5	-2.37076	2	0
									VATVSLPR	0.0396	841.502	841.501	-0.920972	2	0
									VATVSLPR	0.0396	841.502	841.501	-1.71836	2	0
									VATVSLPR	0.0398	841.502	841.5	-2.87937	2	0
									VATVSLPR	0.0403	841.502	841.5	-2.0808	2	0
									VATVSLPR	0.0403	841.502	841.499	-3.82174	2	0
									VATVSLPR	0.0404	841.502	841.502	-0.486036	2	0
									VATVSLPR	0.0405	841.502	841.502	-0.19489	2	0
									VATVSLPR	0.0406	841.502	841.5	-2.22578	2	0
									VATVSLPR	0.0406	841.502	841.499	-3.24182	2	0
									VATVSLPR	0.0407	841.502	841.5	-2.29827	2	0
									VATVSLPR	0.0408	841.502	841.499	-3.45929	2	0
									VATVSLPR	0.0408	841.502	841.5	-2.22578	2	0
									VATVSLPR	0.0409	841.502	841.499	-4.18418	2	0
									VATVSLPR	0.0409	841.502	841.5	-2.15329	2	0
									VATVSLPR	0.041	841.502	841.501	-1.79085	2	0
									VATVSLPR	0.0411	841.502	841.501	-1.4284	2	0
									VATVSLPR	0.0412	841.502	841.501	-1.4284	2	0
									VATVSLPR	0.0413	841.502	841.5	-2.00831	2	0
									VATVSLPR	0.0413	841.502	841.499	-4.18418	2	0
									VATVSLPR	0.0413	841.502	841.5	-2.00831	2	0
									VATVSLPR	0.0413	841.502	841.5	-2.44325	2	0
									VATVSLPR	0.0414	841.502	841.501	-1.86333	2	0
									VATVSLPR	0.0415	841.502	841.5	-2.87937	2	0
									VATVSLPR	0.0415	841.502	841.501	-1.64587	2	0
									VATVSLPR	0.0417	841.502	841.499	-3.74925	2	0
									VATVSLPR	0.0417	841.502	841.499	-3.45929	2	0
									VATVSLPR	0.0417	841.502	841.499	-3.3868	2	0
									VATVSLPR	0.0419	841.502	841.5	-2.7344	2	0
									VATVSLPR	0.0419	841.502	841.499	-3.31431	2	0
									VATVSLPR	0.0422	841.502	841.5	-2.95186	2	0
									VATVSLPR	0.0423	841.502	841.5	-2.44325	2	0
									VATVSLPR	0.0424	841.502	841.499	-3.82174	2	0
									VATVSLPR	0.0426	841.502	841.5	-2.44325	2	0
									VATVSLPR	0.0427	841.502	841.502	-0.703504	2	0
									VATVSLPR	0.0427	841.502	841.501	-1.50089	2	0
									VATVSLPR	0.0431	841.502	841.501	-1.64587	2	0
									VATVSLPR	0.0431	841.502	841.5	-3.02435	2	0
									VATVSLPR	0.0433	841.502	841.5	-2.37076	2	0
									VATVSLPR	0.0433	841.502	841.499	-3.45929	2	0
									VATVSLPR	0.0434	841.502	841.5	-2.22578	2	0
									VATVSLPR	0.0436	841.502	841.5	-2.51693	2	0
									VATVSLPR	0.0438	841.502	841.5	-2.66191	2	0
									VATVSLPR	0.044	841.502	841.5	-2.58942	2	0
									VATVSLPR	0.044	841.502	841.5	-3.09684	2	0
									VATVSLPR	0.0442	841.502	841.501	-1.79085	2	0
									VATVSLPR	0.0444	841.502	841.5	-2.44325	2	0
									VATVSLPR	0.0445	841.502	841.5	-2.58942	2	0
									VATVSLPR	0.0446	841.502	841.501	-1.71836	2	0
									VATVSLPR	0.0446	841.502	841.5	-2.15329	2	0
									VATVSLPR	0.0447	841.502	841.5	-2.22578	2	0
									VATVSLPR	0.0447	841.502	841.501	-1.93582	2	0
									VATVSLPR	0.0451	841.502	841.5	-2.7344	2	0
									VATVSLPR	0.0455	841.502	841.501	-1.86333	2	0
									VATVSLPR	0.0456	841.502	841.501	-1.93582	2	0
									VATVSLPR	0.0456	841.502	841.5	-2.7344	2	0
									VATVSLPR	0.0456	841.502	841.5	-2.00831	2	0
									VATVSLPR	0.0456	841.502	841.501	-1.79085	2	0
									VATVSLPR	0.0457	841.502	841.5	-2.58942	2	0
									VATVSLPR	0.0458	841.502	841.5	-2.15329	2	0
									VATVSLPR	0.0459	841.502	841.5	-2.00831	2	0
									VATVSLPR	0.046	841.502	841.5	-2.95186	2	0
									VATVSLPR	0.0461	841.502	841.501	-1.64587	2	0
									VATVSLPR	0.0461	841.502	841.501	-1.57338	2	0
									VATVSLPR	0.0462	841.502	841.5	-2.22578	2	0
									VATVSLPR	0.0463	841.502	841.501	-1.4284	2	0
									VATVSLPR	0.0464	841.502	841.5	-3.09684	2	0
									VATVSLPR	0.0468	841.502	841.5	-2.29827	2	0
									VATVSLPR	0.0468	841.502	841.499	-3.82174	2	0
									VATVSLPR	0.0469	841.502	841.499	-3.45929	2	0
									VATVSLPR	0.0471	841.502	841.501	-1.50089	2	0
									VATVSLPR	0.0471	841.502	841.5	-2.66191	2	0
									VATVSLPR	0.0472	841.502	841.5	-2.37076	2	0
									VATVSLPR	0.0472	841.502	841.501	-1.86333	2	0
									VATVSLPR	0.0473	841.502	841.5	-3.02435	2	0
									VATVSLPR	0.0474	841.502	841.501	-1.57338	2	0
									VATVSLPR	0.0475	841.502	841.5	-2.0808	2	0
									VATVSLPR	0.0475	841.502	841.501	-1.93582	2	0
									VATVSLPR	0.0477	841.502	841.501	-1.35591	2	0
									VATVSLPR	0.0478	841.502	841.501	-1.57338	2	0
									VATVSLPR	0.0479	841.502	841.5	-2.7344	2	0
									VATVSLPR	0.048	841.502	841.5	-2.37076	2	0
									VATVSLPR	0.048	841.502	841.501	-1.28342	2	0
									VATVSLPR	0.0481	841.502	841.5	-3.09684	2	0
									VATVSLPR	0.0482	841.502	841.501	-1.79085	2	0
									VATVSLPR	0.0482	841.502	841.5	-2.95186	2	0
									VATVSLPR	0.0482	841.502	841.501	-1.21093	2	0
									VATVSLPR	0.0482	841.502	841.501	-1.93582	2	0
									VATVSLPR	0.0483	841.502	841.499	-4.11169	2	0
									VATVSLPR	0.0483	841.502	841.5	-2.95186	2	0
									VATVSLPR	0.0484	841.502	841.501	-0.775993	2	0
									VATVSLPR	0.0487	841.502	841.501	-1.71836	2	0
									VATVSLPR	0.0487	841.502	841.5	-2.51693	2	0
									VATVSLPR	0.0488	841.502	841.499	-3.82174	2	0
									LGEHNIDVLEGNEQFINAAK	0.0489	2211.1	2211.09	-5.57007	3	0
									LGEHNIDVLEGNEQFINAAK	0.049	2211.1	2211.1	-2.58875	3	0
									VATVSLPR	0.0491	841.502	841.499	-3.3868	2	0
									VATVSLPR	0.0493	841.502	841.501	-1.93582	2	0
									VATVSLPR	0.0494	841.502	841.5	-2.00831	2	0
									VATVSLPR	0.0494	841.502	841.5	-2.66191	2	0
									VATVSLPR	0.0495	841.502	841.5	-2.80689	2	0
									VATVSLPR	0.0497	841.502	841.5	-2.29827	2	0
									VATVSLPR	0.0498	841.502	841.501	-1.64587	2	0
									VATVSLPR	0.0498	841.502	841.5	-2.44325	2	0
									VATVSLPR	0.0499	841.502	841.5	-3.09684	2	0
	P08727.4	-	Homo sapiens	Keratin, type I cytoskeletal 19	44105.5	5.04525	3	5.75	VLDELTLAR	8.27e-05	1028.59	1028.58	-2.45969	2	0
									VLDELTLAR	0.000184	1028.59	1028.58	-2.22247	2	0
									VLDELTLAR	0.000223	1028.59	1028.58	-2.5783	2	0
									VLDELTLAR	0.000282	1028.59	1028.59	-0.916792	2	0
									VLDELTLAR	0.000376	1028.59	1028.58	-2.22247	2	0
									VLDELTLAR	0.000538	1028.59	1028.58	-2.81551	2	0
									LAADDFR	0.000712	806.392	806.391	-1.99407	2	0
									VLDELTLAR	0.000772	1028.59	1028.58	-1.62942	2	0
									VLDELTLAR	0.000942	1030.6	1030.59	-13.3281	2	0
									VLDELTLAR	0.000943	1028.59	1028.58	-2.45969	2	0
									VLDELTLAR	0.000972	1028.59	1028.58	-3.05273	2	0
									LAADDFR	0.000983	806.392	806.39	-2.29665	2	0
									LAADDFR	0.00105	806.392	806.391	-1.99407	2	0
									LAADDFR	0.00116	806.392	806.391	-1.6146	2	0
									LAADDFR	0.00124	806.392	806.391	-1.23637	2	0
									LAADDFR	0.00127	806.392	806.391	-1.91718	2	0
									LAADDFR	0.00127	806.392	806.39	-2.221	2	0
									LAADDFR	0.00142	806.392	806.391	-1.08508	2	0
									LAADDFR	0.00147	806.392	806.391	-1.91718	2	0
									LAADDFR	0.00148	806.392	806.391	-1.91718	2	0
									LAADDFR	0.00154	806.392	806.391	-1.91718	2	0
									VLDELTLAR	0.00165	1028.59	1028.58	-1.98525	2	0
									LAADDFR	0.00175	806.392	806.391	-1.91718	2	0
									LAADDFR	0.0018	806.392	806.391	-1.23637	2	0
									LAADDFR	0.0018	806.392	806.391	-1.84154	2	0
									VLDELTLAR	0.00181	1028.59	1028.58	-2.22247	2	0
									VLDELTLAR	0.00185	1028.59	1028.58	-2.45969	2	0
									LAADDFR	0.00186	806.392	806.391	-1.91718	2	0
									LAADDFR	0.00194	806.392	806.392	0.0496037	2	0
									LAADDFR	0.00195	806.392	806.391	-1.6146	2	0
									LAADDFR	0.00205	806.392	806.39	-2.221	2	0
									VLDELTLAR	0.00205	1030.6	1030.59	-13.2098	2	0
									VLDELTLAR	0.00207	1028.59	1028.58	-2.6969	2	0
									LAADDFR	0.00223	806.392	806.391	-1.99407	2	0
									LAADDFR	0.00237	806.392	806.391	-1.84154	2	0
									LAADDFR	0.00246	806.392	806.391	-1.6146	2	0
									LAADDFR	0.00253	806.392	806.391	-1.99407	2	0
									VLDELTLAR	0.00281	1030.6	1030.59	-13.8016	2	0
									LAADDFR	0.00286	806.392	806.391	-1.99407	2	0
									LASYLDK	0.00316	808.433	808.431	-2.40465	2	0
									LASYLDK	0.00317	808.433	808.431	-1.95192	2	0
									LAADDFR	0.00326	806.392	806.391	-1.6146	2	0
									LAADDFR	0.00338	806.392	806.39	-2.221	2	0
									LASYLDK	0.00343	808.433	808.431	-2.17829	2	0
									LAADDFR	0.00359	806.392	806.39	-2.29665	2	0
									LAADDFR	0.00444	806.392	806.391	-1.38766	2	0
									LASYLDK	0.00511	808.433	808.431	-2.02738	2	0
									LASYLDK	0.00556	808.433	808.431	-2.25374	2	0
									LASYLDK	0.00569	808.433	808.431	-2.40465	2	0
									LAADDFR	0.0099	806.392	806.391	-1.6146	2	0
									LASYLDK	0.0103	808.433	808.431	-2.02738	2	0
									LAADDFR	0.0103	806.392	806.392	0.0496037	2	0
									LAADDFR	0.0119	806.392	806.391	-1.08508	2	0
									LASYLDK	0.0122	808.433	808.431	-2.17829	2	0
									LAADDFR	0.0124	806.392	806.391	-1.84154	2	0
									LASYLDK	0.0136	808.433	808.431	-2.3292	2	0
									LAADDFR	0.0147	806.392	806.391	-1.6146	2	0
									LAADDFR	0.0154	806.392	806.39	-2.221	2	0
									LASYLDK	0.0155	808.433	808.431	-2.25374	2	0
									LASYLDK	0.0159	808.433	808.432	-1.72556	2	0
									LAADDFR	0.016	806.392	806.391	-1.99407	2	0
									LASYLDK	0.0164	808.433	808.432	-1.80101	2	0
									LASYLDK	0.0169	808.433	808.431	-2.40465	2	0
									LAADDFR	0.0175	806.392	806.391	-1.53895	2	0
									LAADDFR	0.0185	806.392	806.391	-1.84154	2	0
									LASYLDK	0.0189	808.433	808.431	-2.55556	2	0
									LASYLDK	0.0194	808.433	808.432	-1.4992	2	0
									LAADDFR	0.0211	806.392	806.391	-1.53895	2	0
									LASYLDK	0.0215	808.433	808.432	-1.80101	2	0
									LASYLDK	0.0221	808.433	808.431	-2.25374	2	0
									LAADDFR	0.0227	806.392	806.391	-1.6146	2	0
									LAADDFR	0.0251	806.392	806.391	-1.6146	2	0
									LASYLDK	0.0264	808.433	808.431	-1.95192	2	0
									LASYLDK	0.0274	808.433	808.431	-2.10283	2	0
									LASYLDK	0.03	808.433	808.431	-2.40465	2	0
									LASYLDK	0.0307	808.433	808.431	-2.40465	2	0
									LASYLDK	0.031	808.433	808.432	-1.4992	2	0
									LASYLDK	0.0367	808.433	808.431	-2.40465	2	0
									LASYLDK	0.0406	808.433	808.432	-1.72556	2	0
	Q7Z3Y8.2	-	Homo sapiens	Keratin, type I cytoskeletal 27	49821.8	4.98077	2	3.92157	DAEAWFNEK	0.000112	1108.48	1108.48	-2.44208	2	0
									DAEAWFNEK	0.000113	1108.48	1108.48	-3.10334	2	0
									DAEAWFNEK	0.000133	1108.48	1108.48	-2.88232	2	0
									DAEAWFNEK	0.000205	1108.48	1108.48	-2.88232	2	0
									DAEAWFNEK	0.000227	1108.48	1108.48	-3.43352	2	0
									DAEAWFNEK	0.000245	1108.48	1108.48	-2.88232	2	0
									DAEAWFNEK	0.000251	1108.48	1108.48	-2.44208	2	0
									DAEAWFNEK	0.000281	1108.48	1108.48	-3.10334	2	0
									DAEAWFNEK	0.000307	1108.48	1108.48	-2.22196	2	0
									DAEAWFNEK	0.00031	1108.48	1108.48	-3.10334	2	0
									DAEAWFNEK	0.000337	1108.48	1108.48	-2.6622	2	0
									DAEAWFNEK	0.000367	1108.48	1108.48	-1.56159	2	0
									DAEAWFNEK	0.000388	1108.48	1108.48	-3.32346	2	0
									DAEAWFNEK	0.000399	1108.48	1108.48	-2.6622	2	0
									DAEAWFNEK	0.000442	1108.48	1108.48	-3.43352	2	0
									DAEAWFNEK	0.000567	1108.48	1108.48	-3.32346	2	0
									DAEAWFNEK	0.000865	1108.48	1108.48	-3.32346	2	0
									DAEAWFNEK	0.000883	1108.48	1108.48	-2.6622	2	0
									DAEAWFNEK	0.000893	1108.48	1108.48	-1.89178	2	0
									DAEAWFNEK	0.000976	1108.48	1108.48	-2.22196	2	0
									DAEAWFNEK	0.00106	1108.48	1108.48	-1.67165	2	0
									VTMQNLNDR	0.00123	1105.52	1105.51	-3.70143	2	0	VTM[147]QNLNDR
									DAEAWFNEK	0.00125	1108.48	1108.48	-2.44208	2	0
									DAEAWFNEK	0.00132	1108.48	1108.48	-2.6622	2	0
									DAEAWFNEK	0.00156	1108.48	1108.48	-1.89178	2	0
									DAEAWFNEK	0.00203	1108.48	1108.48	-2.44208	2	0
									VTMQNLNDR	0.00214	1105.52	1105.51	-3.26001	2	0	VTM[147]QNLNDR
									VTMQNLNDR	0.00226	1105.52	1105.52	-2.15555	2	0	VTM[147]QNLNDR
									VTMQNLNDR	0.00226	1105.52	1105.52	-0.609669	2	0	VTM[147]QNLNDR
									DAEAWFNEK	0.00233	1108.48	1108.48	-2.77226	2	0
									VTMQNLNDR	0.00237	1105.52	1105.52	-2.2659	2	0	VTM[147]QNLNDR
									VTMQNLNDR	0.00273	1105.52	1105.52	-2.2659	2	0	VTM[147]QNLNDR
									VTMQNLNDR	0.00299	1105.52	1105.52	-2.15555	2	0	VTM[147]QNLNDR
									VTMQNLNDR	0.00317	1105.52	1105.52	-2.92894	2	0	VTM[147]QNLNDR
									VTMQNLNDR	0.00323	1105.52	1105.52	-2.15555	2	0	VTM[147]QNLNDR
									DAEAWFNEK	0.0035	1108.48	1108.48	-2.77226	2	0
									VTMQNLNDR	0.00382	1105.52	1105.52	-2.92894	2	0	VTM[147]QNLNDR
									VTMQNLNDR	0.00387	1105.52	1105.51	-3.26001	2	0	VTM[147]QNLNDR
									VTMQNLNDR	0.00402	1105.52	1105.51	-3.26001	2	0	VTM[147]QNLNDR
									VTMQNLNDR	0.00427	1105.52	1105.52	-2.37626	2	0	VTM[147]QNLNDR
									DAEAWFNEK	0.0045	1108.48	1108.48	-1.56159	2	0
									VTMQNLNDR	0.00459	1105.52	1105.51	-3.37036	2	0	VTM[147]QNLNDR
									VTMQNLNDR	0.00486	1105.52	1105.52	-2.2659	2	0	VTM[147]QNLNDR
									VTMQNLNDR	0.00489	1105.52	1105.52	-0.609669	2	0	VTM[147]QNLNDR
									VTMQNLNDR	0.00494	1105.52	1105.52	-2.15555	2	0	VTM[147]QNLNDR
									VTMQNLNDR	0.00503	1105.52	1105.52	-2.92894	2	0	VTM[147]QNLNDR
									VTMQNLNDR	0.00521	1105.52	1105.52	-1.93484	2	0	VTM[147]QNLNDR
									VTMQNLNDR	0.00521	1105.52	1105.52	-1.82448	2	0	VTM[147]QNLNDR
									VTMQNLNDR	0.00533	1105.52	1105.52	-2.92894	2	0	VTM[147]QNLNDR
									VTMQNLNDR	0.00554	1105.52	1105.52	-2.2659	2	0	VTM[147]QNLNDR
									VTMQNLNDR	0.00562	1105.52	1105.52	-1.93484	2	0	VTM[147]QNLNDR
									VTMQNLNDR	0.00569	1105.52	1105.52	-1.82448	2	0	VTM[147]QNLNDR
									VTMQNLNDR	0.0059	1105.52	1105.51	-4.14285	2	0	VTM[147]QNLNDR
									VTMQNLNDR	0.00617	1105.52	1105.51	-3.59107	2	0	VTM[147]QNLNDR
									VTMQNLNDR	0.00648	1105.52	1105.52	-2.15555	2	0	VTM[147]QNLNDR
									VTMQNLNDR	0.00658	1105.52	1105.52	-3.14965	2	0	VTM[147]QNLNDR
									VTMQNLNDR	0.00658	1089.52	1089.52	-3.73099	2	0
									VTMQNLNDR	0.00668	1105.52	1105.52	-0.609669	2	0	VTM[147]QNLNDR
									VTMQNLNDR	0.00688	1105.52	1105.52	-2.70823	2	0	VTM[147]QNLNDR
									VTMQNLNDR	0.00691	1105.52	1105.52	-2.15555	2	0	VTM[147]QNLNDR
									VTMQNLNDR	0.00703	1105.52	1105.51	-3.37036	2	0	VTM[147]QNLNDR
									VTMQNLNDR	0.00715	1105.52	1105.52	-2.2659	2	0	VTM[147]QNLNDR
									VTMQNLNDR	0.00787	1105.52	1105.52	-1.82448	2	0	VTM[147]QNLNDR
									VTMQNLNDR	0.00843	1105.52	1105.52	-1.93484	2	0	VTM[147]QNLNDR
									VTMQNLNDR	0.00853	1105.52	1105.52	-2.70823	2	0	VTM[147]QNLNDR
									VTMQNLNDR	0.00871	1105.52	1105.52	-2.2659	2	0	VTM[147]QNLNDR
									VTMQNLNDR	0.00928	1105.52	1105.52	-2.59697	2	0	VTM[147]QNLNDR
									VTMQNLNDR	0.0093	1105.52	1105.52	-2.92894	2	0	VTM[147]QNLNDR
									VTMQNLNDR	0.00944	1105.52	1105.52	-2.2659	2	0	VTM[147]QNLNDR
									VTMQNLNDR	0.00957	1105.52	1105.52	-2.70823	2	0	VTM[147]QNLNDR
									VTMQNLNDR	0.00961	1105.52	1105.51	-3.37036	2	0	VTM[147]QNLNDR
									VTMQNLNDR	0.00974	1105.52	1105.52	-2.59697	2	0	VTM[147]QNLNDR
									VTMQNLNDR	0.00981	1105.52	1105.52	-2.2659	2	0	VTM[147]QNLNDR
									VTMQNLNDR	0.00981	1105.52	1105.52	-2.59697	2	0	VTM[147]QNLNDR
									VTMQNLNDR	0.0101	1105.52	1105.52	-3.14965	2	0	VTM[147]QNLNDR
									VTMQNLNDR	0.0101	1105.52	1105.52	-1.82448	2	0	VTM[147]QNLNDR
									VTMQNLNDR	0.0104	1105.52	1105.52	-3.14965	2	0	VTM[147]QNLNDR
									VTMQNLNDR	0.0116	1105.52	1105.51	-3.59107	2	0	VTM[147]QNLNDR
									VTMQNLNDR	0.0116	1105.52	1105.51	-3.70143	2	0	VTM[147]QNLNDR
									VTMQNLNDR	0.0116	1105.52	1105.52	-2.2659	2	0	VTM[147]QNLNDR
									VTMQNLNDR	0.012	1105.52	1105.52	-2.92894	2	0	VTM[147]QNLNDR
									VTMQNLNDR	0.0124	1105.52	1105.52	-2.48662	2	0	VTM[147]QNLNDR
									VTMQNLNDR	0.0125	1105.52	1105.52	-1.82448	2	0	VTM[147]QNLNDR
									VTMQNLNDR	0.0126	1105.52	1105.52	-2.48662	2	0	VTM[147]QNLNDR
									VTMQNLNDR	0.0139	1105.52	1105.51	-3.59107	2	0	VTM[147]QNLNDR
									VTMQNLNDR	0.0145	1105.52	1105.52	-2.92894	2	0	VTM[147]QNLNDR
									VTMQNLNDR	0.0153	1105.52	1105.52	-2.37626	2	0	VTM[147]QNLNDR
									VTMQNLNDR	0.0162	1105.52	1105.52	-2.92894	2	0	VTM[147]QNLNDR
									VTMQNLNDR	0.0193	1105.52	1105.52	-2.92894	2	0	VTM[147]QNLNDR
									VTMQNLNDR	0.0214	1105.52	1105.52	-2.92894	2	0	VTM[147]QNLNDR
									VTMQNLNDR	0.0217	1105.52	1105.52	-2.92894	2	0	VTM[147]QNLNDR
									VTMQNLNDR	0.0235	1105.52	1105.52	-2.48662	2	0	VTM[147]QNLNDR
									VTMQNLNDR	0.035	1105.52	1105.52	-1.82448	2	0	VTM[147]QNLNDR
									VTMQNLNDR	0.0493	1105.52	1105.52	-2.48662	2	0	VTM[147]QNLNDR
2	ABF08273.1	Rmet_1390	Cupriavidus metallidurans CH34	malate synthase A	58841	6.12364	20	30.1708	EVVGAGATYDR	1.2e-05	1136.55	1136.55	-1.04263	2	0
									EVVGAGATYDR	1.54e-05	1136.55	1136.54	-1.36466	2	0
									LDAGELPDFLPETK	1.64e-05	1543.78	1543.77	-2.39737	2	0
									AYALLLLK	1.98e-05	903.579	903.577	-2.5897	2	0
									AYALLLLK	2.07e-05	903.579	903.577	-2.85974	2	0
									EVVGAGATYDR	2.35e-05	1136.55	1136.54	-1.14998	2	0
									LDAGELPDFLPETK	2.47e-05	1543.78	1543.77	-3.34634	2	0
									EVVGAGATYDR	2.51e-05	1136.55	1136.54	-2.33075	2	0
									EVVGAGATYDR	2.51e-05	1136.55	1136.54	-1.36466	2	0
									LDAGELPDFLPETK	4.17e-05	1543.78	1543.77	-4.61142	2	0
									EVGLPQGTVK	4.5e-05	1026.57	1026.57	-2.20248	2	0
									LDAGELPDFLPETK	4.74e-05	1543.78	1543.78	2.10976	2	0
									EVVGAGATYDR	5.3e-05	1136.55	1136.54	-2.11606	2	0
									EVVGAGATYDR	5.99e-05	1136.55	1136.54	-1.14998	2	0
									LWNDIFVMAQK	7.55e-05	1379.69	1379.68	-5.46644	2	0	LWNDIFVM[147]AQK
									AYALLLLK	7.79e-05	903.579	903.577	-2.79223	2	0
									EVVGAGATYDR	7.87e-05	1136.55	1136.54	-1.79403	2	0
									EVVGAGATYDR	8.11e-05	1136.55	1136.54	-1.57935	2	0
									EVVGAGATYDR	8.29e-05	1136.55	1136.54	-1.36466	2	0
									LDAGELPDFLPETK	8.31e-05	1543.78	1543.77	-2.47639	2	0
									LDAGELPDFLPETK	8.36e-05	1543.78	1543.77	-2.39737	2	0
									EVVGAGATYDR	8.78e-05	1136.55	1136.55	-1.04263	2	0
									EVVGAGATYDR	8.8e-05	1136.55	1136.55	-0.719724	2	0
									EVVGAGATYDR	9.56e-05	1136.55	1136.54	-1.90137	2	0
									AYALLLLK	9.59e-05	903.579	903.577	-2.79223	2	0
									EVVGAGATYDR	0.000112	1136.55	1136.54	-2.33075	2	0
[truncated: 19,169 more rows]

## Sheet: TAble S5
NCBI Accession Number Version	Locus	Taxonomy	Protein Description	Mr	pI	# Unique Peptides	Coverage [%]	Heuristic	Peptide Sequence	Expectation	mr_calc	mr_exp	ppm	z	# Missed Cleavages	Modified Peptide Sequence
P04264.6	-	Homo sapiens	Keratin, type II cytoskeletal 1	66037.9	8.15059	10	15.8385	158.385	GSGGGSSGGSIGGR	0.000175	1091.5	1091.83	307.009	2	0
									SLDLDSIIAEVK	0.000349	1301.71	1301.96	190.751	2	0
									SKAEAESLYQSK	0.000363	1339.66	1340.15	360.928	2	1
									GSGGGSSGGSIGGR	0.000368	1091.5	1091.89	364.605	2	0
									GSGGGSSGGSIGGR	0.000594	1091.5	1091.95	415.715	2	0
									SKAEAESLYQSK	0.000602	1339.66	1340.07	306.985	2	1
									SLDLDSIIAEVK	0.000608	1301.71	1301.77	50.1795	2	0
									SKAEAESLYQSK	0.000729	1339.66	1339.96	225.888	2	1
									GSGGGSSGGSIGGR	0.00082	1091.5	1091.98	446.583	2	0
									SLDLDSIIAEVK	0.0009	1301.71	1301.84	99.3188	2	0
									SKAEAESLYQSK	0.000943	1340.67	1340.7	21.4072	2	1
									YEELQITAGR	0.00098	1178.59	1178.98	326.533	2	0
									SKAEAESLYQSK	0.00164	1339.66	1339.76	75.9945	2	1
									WELLQQVDTSTR	0.00184	1474.74	1474.79	29.6777	2	0
									SLDLDSIIAEVK	0.00187	1303.72	1303.21	-394.07	2	0
									GSGGGSSGGSIGGR	0.00236	1091.5	1091.79	272.898	2	0
									DVDGAYMTK	0.00249	1014.43	1014.81	376.2	2	0	DVDGAYM[147]TK
									SLDLDSIIAEVK	0.0026	1301.71	1301.71	0.946449	2	0
									SLNNQFASFIDK	0.0057	1384.7	1384.35	-250.928	2	0
									SLDLDSIIAEVK	0.00745	1302.72	1303.04	247.304	2	0
									TNAENEFVTIK	0.0121	1264.63	1264.79	129.479	2	0
									TNAENEFVTIKK	0.0174	1392.72	1393.21	347.565	2	1
									AQYEDIAQK	0.0186	1064.51	1064.77	243.841	2	0
									AQYEDIAQK	0.0202	1064.51	1064.81	276.179	2	0
									DVDGAYMTK	0.0219	1014.43	1014.41	-25.0524	2	0	DVDGAYM[147]TK
									WELLQQVDTSTR	0.0228	1474.74	1474.81	43.0869	2	0
									AQYEDIAQK	0.0236	1064.51	1064.79	261.73	2	0
									DVDGAYMTK	0.0299	1014.43	1014.71	268.562	2	0	DVDGAYM[147]TK
									AQYEDIAQK	0.0337	1064.51	1064.78	252.441	2	0
									AQYEDIAQK	0.0467	1064.51	1064.75	219.645	2	0
ABF09276.1	Rmet_2399	Cupriavidus metallidurans CH34	conserved hypothetical protein	11664.1	5.7351	3	34.5794	103.738	EPLEVLDGPAVIEMAR	7.49e-06	1753.89	1754.27	217.383	2	0	EPLEVLDGPAVIEM[147]AR
									EPLEVLDGPAVIEMAR	6.76e-05	1754.9	1754.83	-37.462	2	0	EPLEVLDGPAVIEM[147]AR
									EPLEVLDGPAVIEMAR	0.000191	1754.9	1754.42	-274.313	2	0	EPLEVLDGPAVIEM[147]AR
									EPLEVLDGPAVIEMAR	0.000205	1753.89	1754.38	276.682	2	0	EPLEVLDGPAVIEM[147]AR
									EPLEVLDGPAVIEMAR	0.000285	1753.89	1754.33	249.329	2	0	EPLEVLDGPAVIEM[147]AR
									EPLEVLDGPAVIEMAR	0.000559	1754.9	1754.97	39.6102	2	0	EPLEVLDGPAVIEM[147]AR
									VILHAPTAEAFER	0.00211	1453.78	1453.43	-240.361	2	0
									AAPDADVR	0.00719	813.398	813.68	346.477	2	0
									VILHAPTAEAFER	0.00763	1453.78	1453.42	-245.483	2	0
									VILHAPTAEAFER	0.00795	1453.78	1453.45	-227.934	2	0
									VILHAPTAEAFER	0.0216	1452.77	1453.23	316.05	2	0
									AAPDADVR	0.0292	813.398	813.69	359.459	2	0
									AAPDADVR	0.0303	813.398	813.673	337.848	2	0
									AAPDADVR	0.0326	813.398	813.586	231.445	2	0
									AAPDADVR	0.0379	813.398	813.613	263.861	2	0
									VILHAPTAEAFER	0.0392	1453.78	1453.67	-77.5482	2	0
									VILHAPTAEAFER	0.0395	1453.78	1453.31	-325.504	2	0
									AAPDADVR	0.0497	813.398	813.577	219.365	2	0
ABF10397.1	Rmet_3525	Cupriavidus metallidurans CH34	copper chaperone, heavy metal ion binding (modular protein)	14773.4	8.57688	3	27.0677	81.203	QALQQAIEGAGYPVK	5.64e-06	1571.83	1572.3	298.236	2	0
									QALQQAIEGAGYPVK	5.83e-06	1571.83	1572.31	306.158	2	0
									QALQQAIEGAGYPVK	5.86e-06	1572.84	1572.71	-82.243	2	0
									QALQQAIEGAGYPVK	1.32e-05	1572.84	1572.4	-275.806	2	0
									QALQQAIEGAGYPVK	1.84e-05	1572.84	1572.4	-281.316	2	0
									QALQQAIEGAGYPVK	9.32e-05	1572.84	1572.45	-247.866	2	0
									AVQAVDPAAR	0.00103	996.535	996.778	243.405	2	0
									AVQAVDPAAR	0.00135	996.535	996.741	206.473	2	0
									AVQAVDPAAR	0.00162	996.535	996.928	393.707	2	0
									AVQAVDPAAR	0.00198	996.535	996.841	306.613	2	0
									AVQAVDPAAR	0.00248	996.535	996.905	371.474	2	0
									AVQAVDPAAR	0.00318	996.535	996.944	410.243	2	0
									AVQAVDPAAR	0.00336	996.535	996.895	361.184	2	0
									AVQAVDPAAR	0.00393	996.535	996.91	376.313	2	0
									AVQAVDPAAR	0.00415	997.543	997.179	-364.889	2	0
									AVQAVDPAAR	0.00588	997.543	997.166	-377.677	2	0
									VSADVPTQSVK	0.00967	1129.6	1130.01	366.315	2	0
									VSADVPTQSVK	0.0171	1129.6	1129.86	236.313	2	0
									VSADVPTQSVK	0.0223	1129.6	1129.68	68.5952	2	0
									AVQAVDPAAR	0.0231	996.535	996.878	343.545	2	0
									VSADVPTQSVK	0.0257	1129.6	1129.95	312.175	2	0
									AVQAVDPAAR	0.027	996.535	996.082	-455.243	2	0
									AVQAVDPAAR	0.0356	996.535	996.732	197.593	2	0
									VSADVPTQSVK	0.0373	1129.6	1129.81	186.495	2	0
									VSADVPTQSVK	0.0491	1129.6	1129.85	223.777	2	0
ABF08652.1	Rmet_1773	Cupriavidus metallidurans CH34	putative Glyoxalase/bleomycin resistance protein/dioxygenase	15766.8	5.09366	3	18.1818	54.5455	LTLLTLGVGSLER	4.06e-05	1370.81	1371.09	200.37	2	0
									LTLLTLGVGSLER	4.28e-05	1371.82	1371.55	-200.197	2	0
									LTLLTLGVGSLER	0.000123	1370.81	1371.07	184.965	2	0
									SRAEVDAVIEQAR	0.000173	1442.75	1442.95	138.351	2	1
									LTLLTLGVGSLER	0.000173	1370.81	1371.27	335.459	2	0
									AEVDAVIEQAR	0.000322	1199.61	1200.07	376.591	2	0
									LTLLTLGVGSLER	0.00038	1371.82	1371.48	-250.74	2	0
									LTLLTLGVGSLER	0.000442	1370.81	1370.99	127.26	2	0
									LTLLTLGVGSLER	0.000465	1370.81	1370.95	102.594	2	0
									LTLLTLGVGSLER	0.00055	1370.81	1370.81	-1.05995	2	0
									AEVDAVIEQAR	0.00134	1199.61	1200.06	370.994	2	0
									LTLLTLGVGSLER	0.00134	1371.82	1371.75	-53.2839	2	0
									SRAEVDAVIEQAR	0.0014	1442.75	1443.03	195.886	2	1
									LTLLTLGVGSLER	0.00172	1370.81	1371.16	256.293	2	0
									LTLLTLGVGSLER	0.00189	1370.81	1371.21	292.27	2	0
									AEVDAVIEQAR	0.00333	1202.64	1202.74	88.1196	2	0
									AEVDAVIEQAR	0.00378	1199.61	1200.08	391.041	2	0
									LTLLTLGVGSLER	0.00951	1371.82	1371.74	-59.3343	2	0
									LTLLTLGVGSLER	0.021	1369.81	1370.22	300.228	2	0
ABF11332.1	Rmet_4467	Cupriavidus metallidurans CH34	3-demethylubiquinone-9 3-methyltransferase (plasmid)	16113.3	5.11657	2	18.75	37.5	IFNALAEGGQVFMPYQK	8.44e-06	1928.96	1929.1	75.8005	2	0	IFNALAEGGQVFM[147]PYQK
									FDEAMAFYGK	1.18e-05	1193.51	1193.94	360.86	2	0	FDEAM[147]AFYGK
									FDEAMAFYGK	1.65e-05	1193.51	1193.96	378.248	2	0	FDEAM[147]AFYGK
									IFNALAEGGQVFMPYQK	2.24e-05	1928.96	1928.87	-46.7154	2	0	IFNALAEGGQVFM[147]PYQK
									IFNALAEGGQVFMPYQK	2.24e-05	1928.96	1928.73	-118.351	2	0	IFNALAEGGQVFM[147]PYQK
									FDEAMAFYGK	2.46e-05	1193.51	1193.93	351.247	2	0	FDEAM[147]AFYGK
									IFNALAEGGQVFMPYQK	2.5e-05	1928.96	1928.95	-6.53047	2	0	IFNALAEGGQVFM[147]PYQK
									IFNALAEGGQVFMPYQK	2.6e-05	1928.96	1929.22	136.616	2	0	IFNALAEGGQVFM[147]PYQK
									IFNALAEGGQVFMPYQK	2.79e-05	1928.96	1928.47	-253.967	2	0	IFNALAEGGQVFM[147]PYQK
									FDEAMAFYGK	3.2e-05	1193.51	1193.95	374.668	2	0	FDEAM[147]AFYGK
									IFNALAEGGQVFMPYQK	3.52e-05	1928.96	1928.93	-13.9345	2	0	IFNALAEGGQVFM[147]PYQK
									IFNALAEGGQVFMPYQK	3.73e-05	1929.97	1929.5	-240.356	2	0	IFNALAEGGQVFM[147]PYQK
									FDEAMAFYGK	4.68e-05	1193.51	1193.83	272.799	2	0	FDEAM[147]AFYGK
									IFNALAEGGQVFMPYQK	4.78e-05	1928.96	1928.86	-52.6637	2	0	IFNALAEGGQVFM[147]PYQK
									FDEAMAFYGK	4.86e-05	1194.51	1194.42	-79.4742	2	0	FDEAM[147]AFYGK
									FDEAMAFYGK	5e-05	1194.51	1194.04	-395.146	2	0	FDEAM[147]AFYGK
									FDEAMAFYGK	5.05e-05	1193.51	1193.96	379.169	2	0	FDEAM[147]AFYGK
									FDEAMAFYGK	5.49e-05	1194.51	1194.09	-354.372	2	0	FDEAM[147]AFYGK
									FDEAMAFYGK	5.58e-05	1194.51	1194.13	-319.524	2	0	FDEAM[147]AFYGK
									IFNALAEGGQVFMPYQK	5.6e-05	1928.96	1928.79	-84.6851	2	0	IFNALAEGGQVFM[147]PYQK
									FDEAMAFYGK	5.95e-05	1194.51	1194.01	-418.242	2	0	FDEAM[147]AFYGK
									FDEAMAFYGK	6.24e-05	1194.51	1194.09	-359.072	2	0	FDEAM[147]AFYGK
									IFNALAEGGQVFMPYQK	6.8e-05	1928.96	1928.81	-74.9394	2	0	IFNALAEGGQVFM[147]PYQK
									FDEAMAFYGK	6.9e-05	1193.51	1194.01	418.034	2	0	FDEAM[147]AFYGK
									FDEAMAFYGK	6.91e-05	1193.51	1193.92	343.268	2	0	FDEAM[147]AFYGK
									IFNALAEGGQVFMPYQK	7.18e-05	1928.96	1928.91	-26.3381	2	0	IFNALAEGGQVFM[147]PYQK
									IFNALAEGGQVFMPYQK	7.22e-05	1928.96	1929.31	181.8	2	0	IFNALAEGGQVFM[147]PYQK
									IFNALAEGGQVFMPYQK	8.31e-05	1929.97	1929.49	-244.467	2	0	IFNALAEGGQVFM[147]PYQK
									FDEAMAFYGK	8.53e-05	1193.51	1193.91	337.234	2	0	FDEAM[147]AFYGK
									IFNALAEGGQVFMPYQK	8.6e-05	1928.96	1929.39	223.567	2	0	IFNALAEGGQVFM[147]PYQK
									FDEAMAFYGK	9.19e-05	1193.51	1193.95	368.122	2	0	FDEAM[147]AFYGK
									FDEAMAFYGK	9.96e-05	1193.51	1193.93	351.349	2	0	FDEAM[147]AFYGK
									FDEAMAFYGK	0.000109	1193.51	1193.91	341.019	2	0	FDEAM[147]AFYGK
									FDEAMAFYGK	0.000114	1194.51	1194.14	-310.531	2	0	FDEAM[147]AFYGK
									IFNALAEGGQVFMPYQK	0.000117	1928.96	1929.1	73.6491	2	0	IFNALAEGGQVFM[147]PYQK
									IFNALAEGGQVFMPYQK	0.000119	1928.96	1929	22.8963	2	0	IFNALAEGGQVFM[147]PYQK
									IFNALAEGGQVFMPYQK	0.000148	1928.96	1928.65	-159.612	2	0	IFNALAEGGQVFM[147]PYQK
									IFNALAEGGQVFMPYQK	0.00017	1929.97	1929.68	-148.137	2	0	IFNALAEGGQVFM[147]PYQK
									IFNALAEGGQVFMPYQK	0.000194	1928.96	1929.07	57.3221	2	0	IFNALAEGGQVFM[147]PYQK
									IFNALAEGGQVFMPYQK	0.000208	1928.96	1928.55	-213.15	2	0	IFNALAEGGQVFM[147]PYQK
									IFNALAEGGQVFMPYQK	0.00027	1928.96	1928.87	-43.804	2	0	IFNALAEGGQVFM[147]PYQK
									FDEAMAFYGK	0.000276	1193.51	1193.82	263.593	2	0	FDEAM[147]AFYGK
									IFNALAEGGQVFMPYQK	0.000283	1928.96	1929.2	127.25	2	0	IFNALAEGGQVFM[147]PYQK
									FDEAMAFYGK	0.000315	1193.51	1193.85	285.583	2	0	FDEAM[147]AFYGK
									FDEAMAFYGK	0.000409	1194.51	1194.02	-410.68	2	0	FDEAM[147]AFYGK
									FDEAMAFYGK	0.000416	1193.51	1193.83	269.73	2	0	FDEAM[147]AFYGK
									FDEAMAFYGK	0.000418	1194.51	1194.16	-298.779	2	0	FDEAM[147]AFYGK
									FDEAMAFYGK	0.000454	1193.51	1193.92	344.803	2	0	FDEAM[147]AFYGK
									FDEAMAFYGK	0.000485	1193.51	1193.91	337.336	2	0	FDEAM[147]AFYGK
									IFNALAEGGQVFMPYQK	0.000499	1928.96	1928.87	-45.0067	2	0	IFNALAEGGQVFM[147]PYQK
									FDEAMAFYGK	0.000511	1193.51	1193.7	164.178	2	0	FDEAM[147]AFYGK
									FDEAMAFYGK	0.000539	1193.51	1193.76	208.874	2	0	FDEAM[147]AFYGK
									FDEAMAFYGK	0.000574	1194.51	1194.07	-371.132	2	0	FDEAM[147]AFYGK
									FDEAMAFYGK	0.000609	1194.51	1194.54	20.4702	2	0	FDEAM[147]AFYGK
									IFNALAEGGQVFMPYQK	0.00062	1928.96	1928.96	0.747035	2	0	IFNALAEGGQVFM[147]PYQK
									IFNALAEGGQVFMPYQK	0.000631	1928.96	1928.95	-1.59464	2	0	IFNALAEGGQVFM[147]PYQK
									FDEAMAFYGK	0.000683	1193.51	1193.9	331.302	2	0	FDEAM[147]AFYGK
									FDEAMAFYGK	0.000714	1193.51	1193.58	60.0583	2	0	FDEAM[147]AFYGK
									IFNALAEGGQVFMPYQK	0.000728	1928.96	1928.68	-144.424	2	0	IFNALAEGGQVFM[147]PYQK
									FDEAMAFYGK	0.000788	1193.51	1193.55	35.0002	2	0	FDEAM[147]AFYGK
									FDEAMAFYGK	0.000921	1193.51	1193.68	146.791	2	0	FDEAM[147]AFYGK
									FDEAMAFYGK	0.000974	1193.51	1193.67	135.336	2	0	FDEAM[147]AFYGK
									FDEAMAFYGK	0.00103	1193.51	1193.34	-143.373	2	0	FDEAM[147]AFYGK
									IFNALAEGGQVFMPYQK	0.00122	1928.96	1928.88	-40.4503	2	0	IFNALAEGGQVFM[147]PYQK
									FDEAMAFYGK	0.0013	1194.51	1194.89	317.748	2	0	FDEAM[147]AFYGK
									IFNALAEGGQVFMPYQK	0.00143	1928.96	1929.18	113.075	2	0	IFNALAEGGQVFM[147]PYQK
									FDEAMAFYGK	0.002	1193.51	1193.65	121.426	2	0	FDEAM[147]AFYGK
									FDEAMAFYGK	0.00241	1193.51	1193.68	144.029	2	0	FDEAM[147]AFYGK
									FDEAMAFYGK	0.00351	1193.51	1193.73	190.157	2	0	FDEAM[147]AFYGK
									FDEAMAFYGK	0.0037	1194.51	1194.57	45.9157	2	0	FDEAM[147]AFYGK
									FDEAMAFYGK	0.00415	1193.51	1193.47	-32.6056	2	0	FDEAM[147]AFYGK
									FDEAMAFYGK	0.00479	1192.5	1192.22	-231.437	2	0	FDEAM[147]AFYGK
									FDEAMAFYGK	0.00536	1193.51	1193.57	51.058	2	0	FDEAM[147]AFYGK
									FDEAMAFYGK	0.00603	1193.51	1193.52	10.7599	2	0	FDEAM[147]AFYGK
									FDEAMAFYGK	0.00646	1195.52	1195.93	342.2	2	0	FDEAM[147]AFYGK
									FDEAMAFYGK	0.00745	1193.51	1193.43	-64.1077	2	0	FDEAM[147]AFYGK
									FDEAMAFYGK	0.0186	1193.51	1193.91	334.166	2	0	FDEAM[147]AFYGK
									FDEAMAFYGK	0.0214	1193.51	1193.52	9.02132	2	0	FDEAM[147]AFYGK
P13645.6	-	Homo sapiens	Keratin, type I cytoskeletal 10	58826.4	5.13429	5	7.02055	35.1027	SQYEQLAEQNR	0.00318	1364.63	1364.97	248.855	2	0
									SQYEQLAEQNRK	0.00494	1493.73	1493.24	-329.409	2	1
									SQYEQLAEQNRK	0.00546	1492.73	1493.19	312.063	2	1
									SQYEQLAEQNRK	0.00824	1493.73	1493.32	-278.741	2	1
									NHEEEMKDLR	0.0118	1315.58	1315.74	117.166	2	1	NHEEEM[147]KDLR
									VLDELTLTK	0.0132	1030.59	1030.7	108.153	2	0
									LKYENEVALR	0.0163	1234.68	1234.55	-107.864	2	1
									SQYEQLAEQNR	0.0292	1364.63	1364.59	-30.864	2	0
									SQYEQLAEQNR	0.0383	1364.63	1365.01	277.928	2	0
ABF09855.1	Rmet_2982	Cupriavidus metallidurans CH34	conserved hypothetical protein	15693.5	4.99332	2	11.1111	22.2222	AALDFYAR	0.0127	925.466	925.854	420.004	2	0
									AALDFYAR	0.0127	925.466	925.828	390.985	2	0
									AALDFYAR	0.0306	926.474	926.046	-461.243	2	0
									AALDFYAR	0.031	925.466	925.752	309.272	2	0
									AALDFYAR	0.032	925.466	925.845	409.781	2	0
									TPDSKPTP	0.036	841.418	841.669	298.614	2	0
									AALDFYAR	0.0496	925.466	925.783	342.907	2	0
P00761.1	-	Sus Scrofa	Trypsin	24409.2	6.99753	2	7.79221	15.5844	LSSPATLNSR	0.0245	1044.56	1044.93	362.39	2	0
									LSSPATLNSR	0.0329	1044.56	1044.98	403.76	2	0
									LSSPATLNSR	0.036	1044.56	1044.96	383.66	2	0
									LSSPATLNSR	0.0399	1044.56	1044.84	268.783	2	0
									VATVSLPR	0.0411	841.502	841.509	8.14615	2	0
P35908.2	-	Homo sapiens	Keratin, type II cytoskeletal 2 epidermal	65432.1	8.07353	2	4.53834	9.07668	GFSSGSAVVSGGSR	4.4e-05	1253.6	1253.89	233.638	2	0
									GFSSGSAVVSGGSR	0.000214	1253.6	1253.78	143.078	2	0
									GFSSGSAVVSGGSR	0.000279	1253.6	1253.84	194.298	2	0
									GGSISGGGYGSGGGK	0.000339	1196.54	1197	385.761	2	0
									GGSISGGGYGSGGGK	0.0011	1196.54	1196.83	240.077	2	0
									GGSISGGGYGSGGGK	0.0141	1196.54	1196.93	326.793	2	0
									GGSISGGGYGSGGGK	0.0239	1196.54	1196.64	79.601	2	0
O33522.2	Rmet_2922	Cupriavidus metallidurans CH34	Chaperone protein DnaK	69786	4.90584	2	3.54938	7.09877	DAEANAEEDKR	0.00353	1246.54	1246.68	112.717	2	1
									DAEANAEEDKR	0.0061	1246.54	1246.89	279.389	2	1
									DAEANAEEDKR	0.0064	1246.54	1246.89	274.981	2	1
									DAEANAEEDKR	0.00651	1246.54	1246.57	21.546	2	1
									ANSGLSEDEIQR	0.0237	1317.62	1317.73	85.9666	2	0
									DAEANAEEDKR	0.0271	1246.54	1246.82	224.255	2	1
									ANSGLSEDEIQR	0.0362	1317.62	1317.49	-95.247	2	0
									ANSGLSEDEIQR	0.0435	1317.62	1317.9	214.279	2	0
P35527.3	-	Homo sapiens	Keratin, type I cytoskeletal 9	62063.6	5.13619	2	3.5313	7.0626	FSSSSGYGGGSSR	3.48e-05	1234.52	1234.68	124.601	2	0
									FSSSSGYGGGSSR	8.06e-05	1234.52	1234.85	269.56	2	0
									FSSSSGYGGGSSR	0.000189	1234.52	1234.86	276.481	2	0
									FSSSSGYGGGSSR	0.000761	1234.52	1234.98	370.418	2	0
									STMQELNSR	0.0233	1080.49	1080.95	424.074	2	0	STM[147]QELNSR
									STMQELNSR	0.0479	1081.49	1081.04	-422.398	2	0	STM[147]QELNSR
Supplement Table XXX: Identified, signifiant (Expectation <0.05) peptides of infered proteins (>= 2 peptides) in gel spot corresponding to Au locus in native 2DE WB
Mr: Molecular weight of protein
# Unique peptides: Number of unique, significant peptides correspsonding to respective protein
Coverage [%]: Percentage of protein amino acid sequence covered by detect significant peptides
Heuristic: Heuristic (Number of unique peptides * Sequence Coverage [%]) to rank protein identifications within a spot
mr_calc: Theroretical peptide mass
mr_exp: Measured mass of peptide
ppm: Mass error in ppm
z: Peptide charge
# Missed cleavages: Number of missed tryptic cleavage sites within respective peptide
Modified Peptide Sequence: If amino acid modiciations are present (Oxidation of Methionine and Carbamidomethylation of Cysteine), they are shown here with their position and in brackets the changed mass of the amino acid
